# Supplementary material
Source: PubMed Central journal article supplement (PMC7097885)

# Supporting Information

## Regioselective Alkylative Cross-Coupling of Remote Unactivated C(sp<sup>3</sup>)-H Bonds

Scott M. Thullen, Sean M. Treacy, and Tomislav Rovis\*

*Department of Chemistry, Columbia University*

\*tr2504@columbia.edu

### Table of Contents:

|                                                                    |            |
|--------------------------------------------------------------------|------------|
| <b>Materials and Methods</b> .....                                 | <b>S2</b>  |
| <b>Extended Optimization Studies</b> .....                         | <b>S3</b>  |
| <b>Starting Material Synthesis and Characterization Data</b> ..... | <b>S5</b>  |
| <b>Standard Reaction Conditions</b> .....                          | <b>S9</b>  |
| <b>Characterization Data of Products</b> .....                     | <b>S10</b> |
| <b>NMR Spectra</b> .....                                           | <b>S26</b> |

## Materials and Methods:

Unless otherwise noted, all reactions were performed in oven-dried glassware and carried out under an atmosphere of argon or nitrogen with magnetic stirring. All photochemical reactions were run in 1.0 dram vials fitted with Teflon caps under irradiation from a Blue H150 Kessil 35W LED lamp with Teflon stir-bars under vigorous magnetic stirring. All photochemical reactions were set-up in a nitrogen glovebox, though can also be performed with suitable All column chromatography was performed using a Teledyne Isco Combiflash using CombiFlash gold pre-packed columns outfitted with an ELSD detector. As most of the compounds listed do not exhibit an UV trace, ELSD was integral to the separation of product while thin layer chromatography was performed on SiliCycle® 250  $\mu\text{m}$  60 Å plates. Visualization was accomplished with 254 nm UV light, Seebach's stain, or  $\text{I}_2$ .

$^1\text{H}$  NMR spectra were recorded on Bruker 400 or 500 MHz spectrometers at ambient temperature. Chemical shift is reported in parts per million (ppm) from  $\text{CDCl}_3$  (7.26 ppm) with multiplicity (s = singlet, bs = broad singlet, d = doublet, t = triplet, q = quartet, and m = multiplet) and coupling constants (Hz).  $^{13}\text{C}$  NMR was recorded on Bruker 500 MHz spectrometers (125 MHz) at ambient temperature. Chemical shifts are reported in ppm from  $\text{CDCl}_3$  (77.2 ppm). Mass spectra were recorded on an Agilent 7890B GC System 5977B MSD GCMS with an EI ionization method. Infrared spectra were collected on a Perkin Elmer Spectrum Two FT-IR Spectrometer.

Unless otherwise mentioned, all starting materials were obtained from commercial sources including Sigma-Aldrich, TCI, Matrix, Alfa-Aesar, and Oakwood Scientific. Anhydrous  $\text{Ni}(\text{glyme})\text{Cl}_2$ , 4,4'-di-methyl-2,2'-dipyridyl, anhydrous acetonitrile, and anhydrous  $\text{K}_3\text{PO}_4$  were obtained from Millipore-Sigma.  $\text{Ni}(\text{COD})_2$  was obtained through Strem. Photocatalysts used in this studied were either synthesized through known methods or bought from commercial sources.  $[\text{Ir}(\text{dF-CF}_3\text{ppy})_2(\text{dtbbpy})]\text{PF}_6$ , in particular, was synthesized according to a reported literature procedure<sup>1</sup> or purchased from Aspira Scientific.

## Extended Optimization Studies:

**Table S1:** Photocatalyst optimization

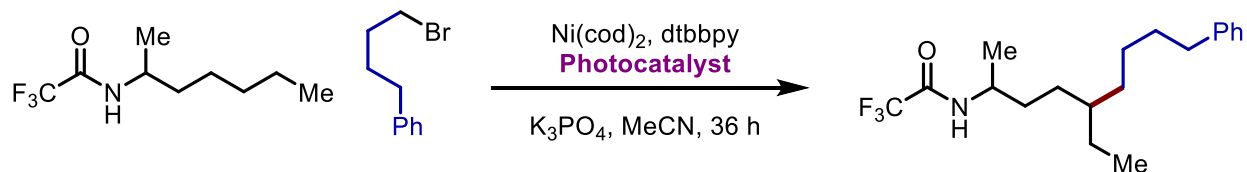

| Entry | Photocatalyst (1 mol%)                                                                   | Yield |
|-------|------------------------------------------------------------------------------------------|-------|
| 1     | [Ir(dF-CF <sub>3</sub> ppy) <sub>2</sub> dtbbpy]PF <sub>6</sub> :                        | 74%   |
| 2     | 4Cz-IPN (5 mol%):                                                                        | 73%   |
| 3     | 4Cz-TPN (5 mol%):                                                                        | 52%   |
| 4     | [Ir(ppy) <sub>2</sub> dtbbpy]PF <sub>6</sub> :                                           | 15%   |
| 5     | [Ir((dF-Me)ppy) <sub>2</sub> dtbbpy]PF <sub>6</sub> :                                    | 54%   |
| 6     | [Ir((dF-CF <sub>3</sub> )ppy) <sub>2</sub> (5,5'-dCF <sub>3</sub> )bpy]PF <sub>6</sub> : | 61%   |
| 7     | Ru(bpy <sub>3</sub> )Cl <sub>2</sub> :                                                   | 0%    |
| 8     | Ir(ppy) <sub>3</sub> :                                                                   | 0%    |

**Table S2:** Nickel Precatalyst Optimization

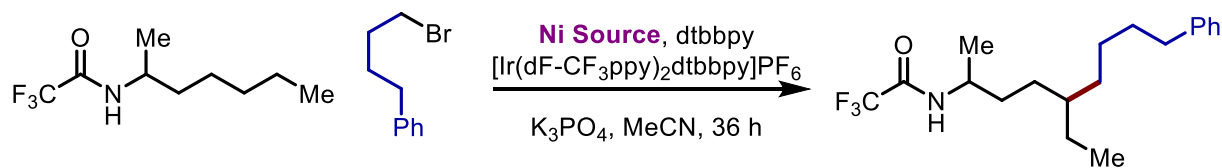

| Entry | Nickel Source (10 mol%)                            | Yield |
|-------|----------------------------------------------------|-------|
| 1     | Ni(cod) <sub>2</sub>                               | 63%   |
| 2     | Ni(glyme)Cl <sub>2</sub>                           | 78%   |
| 3     | Ni(acac) <sub>2</sub>                              | trace |
| 4     | NiBr <sub>2</sub>                                  | trace |
| 5     | Ni(OAc) <sub>2</sub> ·4H <sub>2</sub> O            | 43%   |
| 6     | Ni(PPh <sub>3</sub> ) <sub>2</sub> Cl <sub>2</sub> | 20%   |

**Table S3: Ligand Optimization**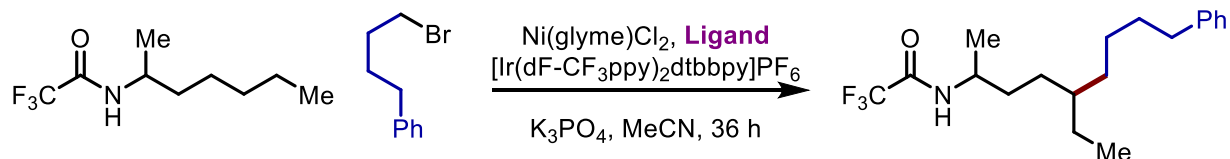

| Entry | Ligand         | Yield |
|-------|----------------|-------|
| 1     | bpy            | 62%   |
| 2     | dtbbpy         | 70%   |
| 3     | (4,4'-dMe)bpy  | 76%   |
| 4     | (6,6'-dMe)bpy  | 0%    |
| 5     | acridine       | 12%   |
| 6     | 2,9-neocuproin | 0%    |
| 7     | Bathocuproin   | 0%    |
| 8     | (diBn-BOX)     | 0%    |

**Table S4: Relative Equivalents**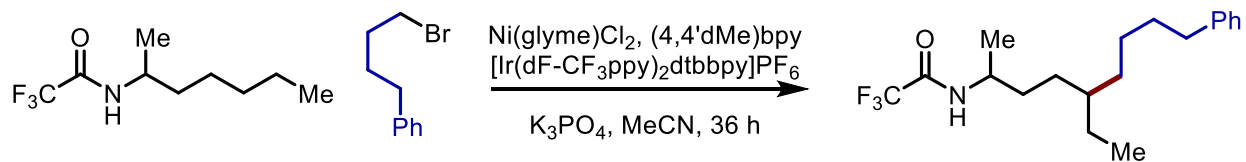

| Entry | Equivalents of alkyl bromide                 | Yield |
|-------|----------------------------------------------|-------|
| 1     | 4                                            | 30%   |
| 2     | 2                                            | 70%   |
| 3     | 1                                            | 55%   |
| 4     | 0.5                                          | 15%   |
| 5     | 0.25                                         | 12%   |
| 6     | 2 (2 aliquots, start, 18 h)                  | 36%   |
| 7     | 2 (4 aliquots, start, 6 h, 12 h, 18 h, 24 h) | 32%   |

**Scheme S5: Model for origin of stereoselectivity from cyclic systems.**

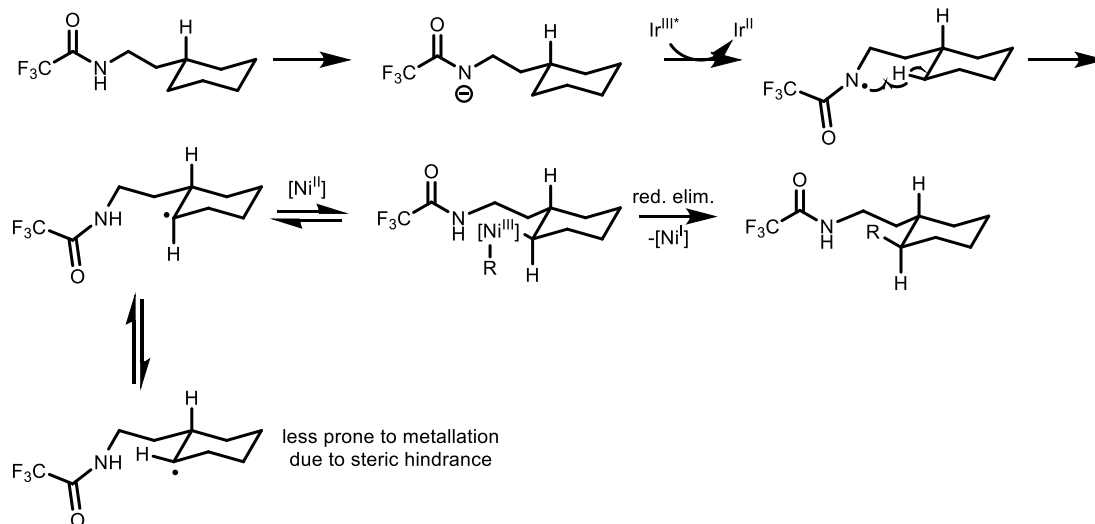

### Starting Material Synthesis and characterization Data:

Procedure A: To a stirring solution of amine (5 mmol) in dichloromethane (50 mL, 0.1 M), triethylamine (10 mmol, 2.0 equiv) was added under  $N_2$ . The resulting solution was cooled with an ice bath and trifluoroacetic anhydride (5.5 mmol, 1.1 equiv) was added dropwise. After complete addition, the reaction was warmed to room temperature and the solution was allowed to stir for 12 hours. The reaction was quenched with slow addition of 1 M HCl and extracted with dichloromethane (3 x 10 mL). The organic layer was then washed with concentrated  $NaHCO_3$  (50 mL) before being passed through a short silica plug and concentrated to afford the intended trifluoroacetamide without need for further chromatography.

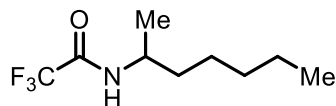

#### 1a - 2,2,2-trifluoro-N-(heptan-2-yl)acetamide

Prepared using procedure A from commercially available heptan-2-amine.

Yield 82%

$^1H$  NMR (500 MHz, Chloroform-*d*)  $\delta$  6.01 (s, 1H), 4.02 (dq,  $J = 8.5, 6.6$  Hz, 1H), 1.63 – 1.43 (m, 2H), 1.37 – 1.25 (m, 6H), 1.21 (d,  $J = 6.6$  Hz, 3H), 0.96 – 0.82 (m, 3H).

$^{13}C$  NMR (126 MHz, Chloroform-*d*)  $\delta$  156.65 (q,  $J = 36.7$  Hz), 116.08 (q,  $J = 288.2$  Hz), 46.71, 36.51, 31.64, 25.65, 22.66, 20.57, 14.13.

$^{19}F$  NMR (471 MHz, Chloroform-*d*)  $\delta$  -75.12.

IR (film)  $\nu_{max}$  3293, 3099, 2960, 2932, 2862, 1696, 1556, 1156, 1182, 724

LRMS (EI)  $m/z$  calculated 211.12, found 211.2

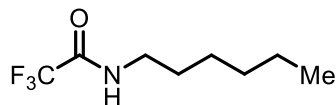

#### 1b - 2,2,2-trifluoro-N-hexylacetamide

Prepared using procedure A from commercially available hexylamine. Structure previously reported by Xu *et al.*<sup>2</sup>

Yield 90%

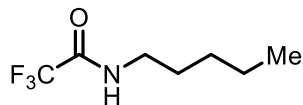

#### 1c - 2,2,2-trifluoro-N-pentylacetamide

Prepared using procedure A from commercially available pentylamine. Structure previously reported by Milan *et al.*<sup>1</sup>

Yield 92%

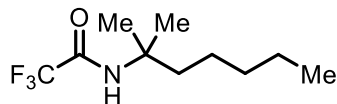

**1d** - 2,2,2-trifluoro-N-(2-methylheptan-2-yl)acetamide

Prepared according to previously published procedure from Chu *et al.*<sup>3</sup>

Yield 17% (3 steps)

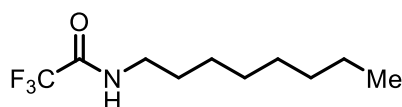

**1e** - 2,2,2-trifluoro-N-octylacetamide

Prepared using procedure A from commercially available octylamine. Structure previously reported by Xu *et al.*<sup>2</sup>

Yield 88%

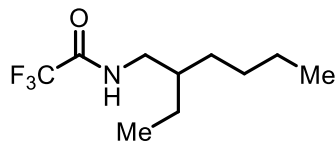

**1f** - N-(2-ethylhexyl)-2,2,2-trifluoroacetamide

Prepared using procedure A from commercially available 2-ethylhexan-1-amine.

Yield 83%

<sup>1</sup>H NMR (500 MHz, Chloroform-*d*)  $\delta$  6.24 (s, 1H), 3.31 (td,  $J$  = 6.2, 2.1 Hz, 2H), 1.53 (p,  $J$  = 6.2 Hz, 1H), 1.40 – 1.22 (m, 8H), 0.95 – 0.87 (m, 6H).

<sup>13</sup>C NMR (126 MHz, Chloroform-*d*)  $\delta$  157.49 (d,  $J$  = 36.1 Hz), 116.11 (q,  $J$  = 288.1 Hz), 43.00, 39.22, 30.96, 28.90, 24.25, 23.07, 14.15, 10.92.

<sup>19</sup>F NMR (471 MHz, Chloroform-*d*)  $\delta$  -75.00.

IR (film)  $\nu_{\max}$  3303, 3108, 2962, 2931, 2863, 1700, 1558, 1157, 1180, 722

LRMS (EI) [C<sub>10</sub>H<sub>18</sub>F<sub>3</sub>NO]  $m/z$  calculated 225.13, found 225.2

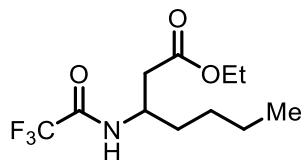

**1g** - ethyl 3-(2,2,2-trifluoroacetamido)heptanoate

Prepared using procedure A from commercially available ethyl 3-aminoheptanoate.

Yield 72%

<sup>1</sup>H NMR (500 MHz, Chloroform-*d*)  $\delta$  7.22 (s, 1H), 4.30 – 4.22 (m, 1H), 4.19 (qd,  $J$  = 7.1, 0.8 Hz, 2H), 2.81 – 2.44 (m, 2H), 1.70 – 1.52 (m, 2H), 1.34 (ddt,  $J$  = 7.8, 6.0, 4.3 Hz, 4H), 1.29 (t,  $J$  = 7.2 Hz, 3H), 0.91 (t,  $J$  = 7.0 Hz, 3H).

<sup>13</sup>C NMR (126 MHz, Chloroform-*d*)  $\delta$  171.57, 156.63 (q,  $J$  = 36.9 Hz), 115.88 (q,  $J$  = 288.0 Hz), 61.07, 46.83, 37.49, 33.33, 28.15, 22.27, 13.97 (d,  $J$  = 30.4 Hz).

<sup>19</sup>F NMR (471 MHz, Chloroform-*d*)  $\delta$  -75.21.

IR (film)  $\nu_{\max}$  3295, 3103, 2959, 2931, 2863, 1730, 1701, 1556, 1174, 725, 700

LRMS (EI) [C<sub>11</sub>H<sub>18</sub>F<sub>3</sub>NO<sub>3</sub>] m/z calculated 269.12, found 269.1

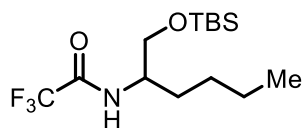

**1h** - N-(1-((tert-butyldimethylsilyloxy)hexan-2-yl)-2,2,2-trifluoroacetamide

From commercially available 2-aminoethanol (1.00 g, 8.53 mmol) 1-((tert-butyldimethylsilyloxy)hexan-2-amine was prepared by the portionwise addition of 1.5 equivalents (1.93 g) tert-Butyldimethylsilyl Chloride to a stirring solution of amino alcohol in dichloromethane (.1 M) at room temperature. After stirring for two hours, the reaction mixture was quenched with H<sub>2</sub>O and extracted three times dichloromethane. The organic layers were combined and washed with H<sub>2</sub>O and brine and dried over Na<sub>2</sub>SO<sub>4</sub>. The solution was concentrated *en vacuo* to give 1-((tert-butyldimethylsilyloxy)hexan-2-amine which was carried through without further purification. **2h** was prepared using procedure A from 1-((tert-butyldimethylsilyloxy)hexan-2-amine.

Yield 63%

<sup>1</sup>H NMR (500 MHz, Chloroform-*d*) δ 6.52 (d, *J* = 9.1 Hz, 1H), 3.98 (dtd, *J* = 10.5, 6.9, 3.2 Hz, 1H), 3.78 – 3.57 (m, 2H), 1.65 – 1.53 (m, 2H), 1.34 (dddd, *J* = 17.2, 13.9, 6.9, 5.0 Hz, 4H), 0.91 (s, 7H), 0.08 (d, *J* = 2.5 Hz, 6H).

<sup>13</sup>C NMR (126 MHz, Chloroform-*d*) δ 156.63 (q, *J* = 36.5 Hz), 115.97 (q, *J* = 288.1 Hz), 63.48, 51.28, 30.75, 27.95, 25.73, 22.46, 18.18, 13.89, -5.62 (d, *J* = 7.2 Hz).

<sup>19</sup>F NMR (471 MHz, Chloroform-*d*) δ -75.21.

IR (film)  $\nu_{\max}$  3305, 3104, 2932, 2859, 1702, 1557, 1161, 833, 774

LRMS (EI) [C<sub>14</sub>H<sub>28</sub>F<sub>3</sub>NO<sub>2</sub>Si] m/z calculated 327.18 found 327.0

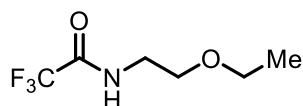

**1i** - N-(2-ethoxyethyl)-2,2,2-trifluoroacetamide

Prepared using procedure A from commercially available 2-ethoxyethan-1-amine.

<sup>1</sup>H NMR (500 MHz, Chloroform-*d*) δ 6.75 (s, 1H), 3.83 – 3.30 (m, 7H), 1.24 (t, *J* = 7.0 Hz, 3H).

<sup>13</sup>C NMR (126 MHz, Chloroform-*d*) δ 157.21 (q, *J* = 37.0 Hz), 115.84 (q, *J* = 287.6 Hz), 67.80, 66.69, 39.75, 14.99.

<sup>19</sup>F NMR (471 MHz, Chloroform-*d*) δ -75.09.

IR (film)  $\nu_{\max}$  3308, 3100, 2980, 2939, 2875, 1706, 1556, 1153, 1117, 723

LRMS (EI) [C<sub>6</sub>H<sub>10</sub>F<sub>3</sub>NO<sub>2</sub>] m/z calculated 185.15 found 185.9

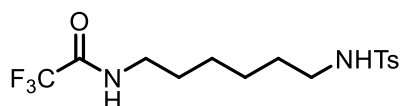

**1j** - 2,2,2-trifluoro-N-(6-((4-methylphenyl)sulfonamido)hexyl)acetamide

To a vigorously stirred solution of 20.0 g (172 mmol) hexane-1,6-diamine was added dropwise 1 equivalent (1.22 g, 8.6 mmol) of ethyl 2,2,2-trifluoroacetate at 0 °C overnight. The resulting solution was washed with a 1:1 mixture of brine and water until diamine was absent by TLC. The solution was then dried over Na<sub>2</sub>SO<sub>4</sub> and concentrated to a white paste. This paste was then dissolved in dichloromethane (0.1 M) at 0 °C. 2 equivalents (1.36 g, 17.2 mmol) of pyridine was added along with 1.5 equivalents (2.46 g, 12.9 mmol) of 4-Toluenesulfonyl chloride. The solution was permitted to warm to room temperature overnight. The product was purified by silica gel chromatography 20-40% EtOAc:Hexane.

Yield 38%

<sup>1</sup>H NMR (400 MHz, Chloroform-*d*) δ 7.75 (d, *J* = 8.3 Hz, 2H), 7.33 (d, *J* = 8.1 Hz, 2H), 6.75 (s, 1H), 4.87 (t, *J* = 6.2 Hz, 1H), 3.34 (q, *J* = 6.8 Hz, 2H), 2.93 (q, *J* = 6.7 Hz, 2H), 2.44 (s, 3H), 1.61 – 1.43 (m, 4H), 1.39-1.25 (m, 4H).

<sup>13</sup>C NMR (101 MHz, Chloroform-*d*) δ 157.33 (q, *J* = 36.7 Hz), 143.51, 136.80, 129.76, 127.03, 115.90 (q, *J* = 287.8 Hz), 42.81, 39.59, 29.26, 28.61, 25.78, 25.67, 21.51.

<sup>19</sup>F NMR (376 MHz, Chloroform-*d*) δ -75.88.

IR (film)  $\nu_{\max}$  3295, 3095, 2927, 2849, 1707, 1560, 1150, 1183, 1091, 722

LRMS (ESI+APCI) [C<sub>15</sub>H<sub>21</sub>F<sub>3</sub>N<sub>2</sub>O<sub>3</sub>S] m/z ([M+H]<sup>+</sup>) calculated 367.12 found 367.1

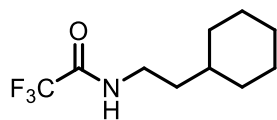

**1k** - N-(2-cyclohexylethyl)-2,2,2-trifluoroacetamide

Prepared using procedure A from commercially available 2-cyclohexylethan-1-amine.

Yield 92%

<sup>1</sup>H NMR (500 MHz, Chloroform-*d*) δ 6.21 (s, 1H), 3.43 – 3.33 (m, 2H), 1.75 – 1.63 (m, 3H), 1.52 – 1.43 (m, 2H), 1.35 – 1.10 (m, 3H), 1.00 – 0.87 (m, 2H).

<sup>13</sup>C NMR (126 MHz, Chloroform-*d*) δ 157.27 (q, *J* = 38.6, 37.6 Hz), 116.05 (q, *J* = 287.8 Hz), 38.07, 36.57, 35.42, 33.20, 26.55, 26.27.

<sup>19</sup>F NMR (471 MHz, Chloroform-*d*) δ -75.08.

IR (film) ν<sub>max</sub> 3303, 3106, 2924, 2853, 1700, 1560, 1449, 1157, 723

LRMS (EI) [C<sub>10</sub>H<sub>16</sub>F<sub>3</sub>NO] m/z calculated 223.12 found 223.1

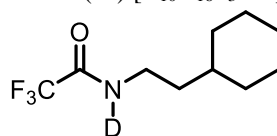

**1k-N(d)** - N-(2-cyclohexylethyl)-2,2,2-trifluoroacetamide-d

Prepared through portion wise addition of KH (40.1 mg, 1.0 equiv.) to 10 mL THF solution of 223 mg (1mmol) **1k**. The solution was allowed to stir for 6 hours under nitrogen atmosphere. The reaction was quenched via dropwise addition of DCl (1.0 M, Et<sub>2</sub>O). The solvent was removed under reduced pressure to afford the N-deuterated product which was verified by the absence of the N-H signal in the <sup>1</sup>H NMR spectrum.

Yield 96%

<sup>1</sup>H NMR (500 MHz, Chloroform-*d*) δ 3.43 – 3.33 (m, 2H), 1.75 – 1.63 (m, 3H), 1.52 – 1.43 (m, 2H), 1.35 – 1.10 (m, 3H), 1.00 – 0.87 (m, 2H).

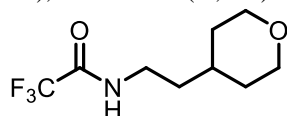

**1l** - 2,2,2-trifluoro-N-(2-(tetrahydro-2H-pyran-4-yl)ethyl)acetamide

Prepared using procedure A from commercially available 2-(tetrahydro-2H-pyran-4-yl)ethan-1-amine.

Yield 88%

<sup>1</sup>H NMR (500 MHz, Chloroform-*d*) δ 6.73 (s, 1H), 3.96 – 3.90 (m, 2H), 3.42 – 3.31 (m, 4H), 1.67 – 1.48 (m, 5H), 1.29 (ddt, *J* = 16.8, 10.7, 4.6 Hz, 2H).

<sup>13</sup>C NMR (126 MHz, Chloroform-*d*) δ 157.47 (q, *J* = 36.8 Hz), 116.01 (q, *J* = 287.8 Hz), 67.91, 37.44, 36.06, 32.84, 32.66.

<sup>19</sup>F NMR (471 MHz, Chloroform-*d*) δ -75.05.

IR (film) ν<sub>max</sub> 3295, 3095, 2924, 2849, 1706, 1560, 1181, 1149, 1091, 722

LRMS (EI) [C<sub>9</sub>H<sub>14</sub>F<sub>3</sub>NO<sub>2</sub>] m/z calculated 223.12 found 223.1

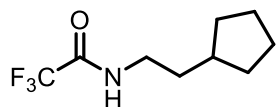

**1m** - N-(2-cyclopentylethyl)-2,2,2-trifluoroacetamide

Prepared using procedure A from commercially available 2-cyclopentylethan-1-amine.

Yield 87%



$^1\text{H}$  NMR (500 MHz, Chloroform-*d*)  $\delta$  3.38 (dt,  $J = 7.8, 6.0$  Hz, 2H), 1.85 – 1.75 (m, 3H), 1.67 – 1.49 (m, 6H), 1.18 – 1.04 (m, 2H).

$^{13}\text{C}$  NMR (126 MHz, Chloroform-*d*)  $\delta$  157.28 (q,  $J = 36.6$  Hz), 116.06 (q,  $J = 287.8$  Hz), 39.66, 37.73, 35.36, 32.71, 25.23.

$^{19}\text{F}$  NMR (471 MHz, Chloroform-*d*)  $\delta$  -75.09.

IR (film)  $\nu_{\text{max}}$  3304, 3102, 2950, 2868, 1700, 1559, 1181, 1152, 720, 691

LRMS (EI)  $[\text{C}_9\text{H}_{14}\text{F}_3\text{NO}]$   $m/z$  calculated 209.10 found 209.2

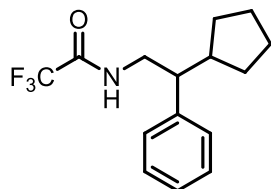

**1n** - N-(2-cyclopentyl-2-phenylethyl)-2,2,2-trifluoroacetamide

Prepared using procedure A from commercially available 2-cyclopentyl-2-phenylethan-1-amine.

Yield 78%

$^1\text{H}$  NMR (500 MHz, Chloroform-*d*)  $\delta$  7.34 (t,  $J = 7.4$  Hz, 2H), 7.29 – 7.22 (m, 1H), 7.21 – 7.09 (m, 2H), 6.01 (s, 1H), 3.93 (ddd,  $J = 13.5, 7.2, 4.4$  Hz, 1H), 3.31 (ddd,  $J = 13.5, 10.5, 4.6$  Hz, 1H), 2.57 (td,  $J = 10.4, 4.5$  Hz, 1H), 2.15 – 1.92 (m, 2H), 1.75 – 1.65 (m, 1H), 1.65 – 1.28 (m, 3H), 1.09 – 0.94 (m, 1H).

$^{13}\text{C}$  NMR (126 MHz, Chloroform-*d*)  $\delta$  157.10 (q,  $J = 36.7$  Hz), 141.71, 129.08, 128.04, 127.37, 115.89 (q,  $J = 288.0$  Hz), 51.56, 44.57, 43.90, 31.80, 31.47, 25.53, 24.82.

$^{19}\text{F}$  NMR (471 MHz, Chloroform-*d*)  $\delta$  -75.28.

IR (film)  $\nu_{\text{max}}$  3310, 3105, 3030, 2952, 2869, 1703, 1556, 1452, 1160, 724, 700

LRMS (EI)  $[\text{C}_{15}\text{H}_{18}\text{F}_3\text{NO}]$   $m/z$  calculated 285.13 found 285.1

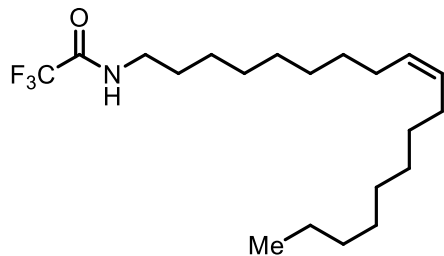

**1o** - (Z)-2,2,2-trifluoro-N-(octadec-9-en-1-yl)acetamide

Prepared using procedure A from commercially available (Z)-octadec-9-en-1-amine.

Yield 66%

$^1\text{H}$  NMR (500 MHz, Chloroform-*d*)  $\delta$  6.30 (s, 1H), 5.39 – 5.30 (m, 2H), 3.35 (q,  $J = 6.8$  Hz, 2H), 2.06 – 1.92 (m, 3H), 1.58 (p,  $J = 7.2$  Hz, 2H), 1.41 – 1.18 (m, 23H), 0.88 (t,  $J = 6.9$  Hz, 3H).

$^{13}\text{C}$  NMR (126 MHz, Chloroform-*d*)  $\delta$  157.33 (q,  $J = 36.6$  Hz), 130.22, 129.90, 116.07 (q,  $J = 287.8$  Hz), 40.18, 32.09, 29.95, 29.88, 29.84, 29.71, 29.51, 29.50, 29.34, 29.29, 29.14, 27.40, 27.34, 26.84, 22.86, 14.28.

$^{19}\text{F}$  NMR (471 MHz, Chloroform-*d*)  $\delta$  -75.07.

IR (film)  $\nu_{\text{max}}$  3305, 3107, 2924, 2855, 1703, 1557, 1464, 1182, 1163, 722

LRMS (EI)  $[\text{C}_{20}\text{H}_{36}\text{F}_3\text{NO}]$   $m/z$  calculated 363.27, found 363.3

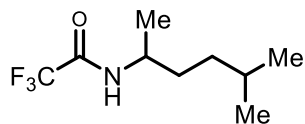

**1p** - 2,2,2-trifluoro-N-(5-methylhexan-2-yl)acetamide

Prepared using procedure A from commercially available 5-methylhexan-2-amine. Prepared according to previously published procedure from Chu *et al.*<sup>3</sup>  
Yield 75%

### Standard Reaction Conditions:

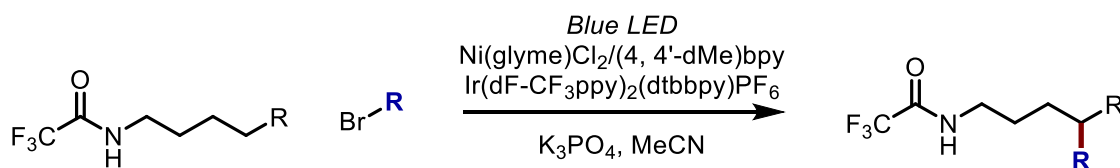

To an oven-dried vial,  $[\text{Ir}(\text{dF-CF}_3\text{ppy})_2\text{dtbbpy}]\text{PF}_6$  (0.001 mmol, 0.01 equiv.), 4, 4'-dimethyl-2, 2'-bipyridine (0.012 mmol, 0.12 equiv.), trifluoroacetamide (0.1 mmol, 1 equiv.), and  $\text{K}_3\text{PO}_4$  (0.4 mmol, 4 equiv) were added sequentially. The vial was charged with a stir bar and transferred to a glovebox, where the solids were backfilled with an inert atmosphere. In the glovebox,  $\text{Ni}(\text{glyme})\text{Cl}_2$  (0.01 mmol, 0.1 equiv) was added followed by anhydrous acetonitrile (0.75 mL, 0.13 M) and the reaction was stirred for roughly 5 minutes to insure complexation between nickel and the ligand. Subsequently add alkyl bromide (0.11 mmol, 1.1 equiv.) and seal tightly. Place ~2-6 inches from a blue Kessil lamp and irradiate and stir for 36 hours at room temperature. Upon completion, reactions were run through a short silica plug and concentrated *in vacuo*. Products were purified using flash column chromatography using EtOAc:Hexanes as an eluent.

### Characterization Data of Products:

*Note:* The following compound characterization is listed with isolated yield defined as a ratio of diastereomers where relevant. Listing of  $^1\text{H}$  and  $^{13}\text{C}$  follows with a comment on whether they are resolved or not. Some reactions lead to trace amounts of alkene impurities, whose composition is further denoted. Efforts to further purify these products met with failure, not surprising given that these largely non-polar, modestly functionalized alkanes often without a UV reporter group.

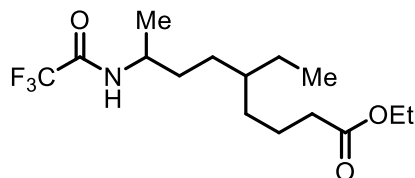

**3aa** - ethyl 5-ethyl-8-(2,2,2-trifluoroacetamido)nonanoate  
Prepared using procedure B from compound **2c**.  
Yield 73% 1:1 dr

Mix of diastereomers ~3:1 Maj:Min, <sup>1</sup>H peaks unresolved, <sup>13</sup>C Major diastereomer selected, contains 6% impurity of unsaturated product

<sup>1</sup>H NMR (400 MHz, Chloroform-*d*) δ 6.33 – 5.84 (m, 1H), 4.31 – 3.85 (m, 3H), 2.27 (t, *J* = 7.4 Hz, 2H), 1.65 – 1.44 (m, 4H), 1.42 – 1.15 (m, 10H), 0.86 (dt, *J* = 20.2, 6.9 Hz, 3H).

<sup>13</sup>C NMR (101 MHz, Chloroform-*d*) δ 173.83, 156.63 (q, *J* = 36.4 Hz), 116.11 (q, *J* = 287.6 Hz), 60.45, 44.83, 41.17, 35.80, 34.65, 34.28, 33.06, 21.90, 21.04, 19.67, 14.42, 11.00.

<sup>19</sup>F NMR (471 MHz, Chloroform-*d*) δ -75.13.

IR (film)  $\nu_{\max}$  3309, 3096, 2960, 2932, 2873, 1700, 1553, 1155, 724

LRMS (EI) [C<sub>15</sub>H<sub>26</sub>F<sub>3</sub>NO<sub>3</sub>] *m/z* calculated 325.19, found 325.2

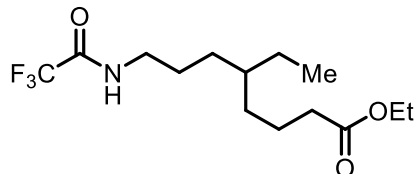

**3ba** - ethyl 5-ethyl-8-(2,2,2-trifluoroacetamido)octanoate

Prepared using procedure B from compound **2b**.

Yield 46%

<sup>1</sup>H NMR (500 MHz, Chloroform-*d*) δ 6.46 (s, 1H), 4.12 (q, *J* = 7.1 Hz, 2H), 3.34 (q, *J* = 6.8 Hz, 2H), 2.28 (t, *J* = 7.3 Hz, 2H), 1.57 (ddt, *J* = 14.5, 11.9, 7.3 Hz, 3H), 1.31 – 1.22 (m, 92H), 0.86 – 0.81 (m, 3H).

<sup>13</sup>C NMR (126 MHz, Chloroform-*d*) δ 174.01, 157.38 (q, *J* = 36.9 Hz), 116.07 (q, *J* = 287.9 Hz), 60.46, 40.48, 38.41, 34.68, 32.45, 29.95, 26.18, 22.04, 14.41, 10.92.

<sup>19</sup>F NMR (471 MHz, Chloroform-*d*) δ -75.05.

IR (film)  $\nu_{\max}$  3322, 3102, 2919, 2854, 1705, 1554, 1155, 1035, 722

LRMS (EI) [C<sub>14</sub>H<sub>24</sub>F<sub>3</sub>NO<sub>3</sub>] *m/z* calculated 311.17, found 311.1

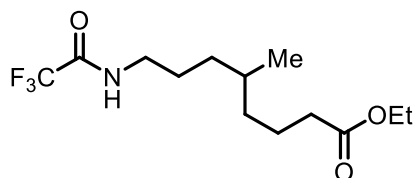

**3ca** - ethyl 5-methyl-8-(2,2,2-trifluoroacetamido)octanoate

Prepared using procedure B from compound **2a**.

Yield 55%, contains 6% impurity of unsaturated product

<sup>1</sup>H NMR (500 MHz, Chloroform-*d*) δ 6.51 (s, 1H), 4.11 (q, *J* = 7.1 Hz, 2H), 3.38 – 3.28 (m, 2H), 2.27 (ddd, *J* = 7.8, 7.1, 2.3 Hz, 2H), 1.66 – 1.51 (m, 4H), 1.48 – 1.40 (m, 1H), 1.39 – 1.21 (m, 6H), 1.21 – 1.08 (m, 2H), 0.88 (d, *J* = 6.6 Hz, 3H).

<sup>13</sup>C NMR (126 MHz, Chloroform-*d*) δ 174.00, 157.38 (q, *J* = 36.8 Hz), 116.06 (q, *J* = 287.8 Hz), 60.43, 40.39, 36.27, 34.63, 33.72, 32.34, 26.55, 22.45, 19.52, 14.40.

<sup>19</sup>F NMR (471 MHz, Chloroform-*d*) δ -75.05.

IR (film)  $\nu_{\max}$  3324, 3102, 2935, 2873, 1706, 1554, 1156, 1034, 722

LRMS (EI) [C<sub>13</sub>H<sub>22</sub>F<sub>3</sub>NO<sub>3</sub>] *m/z* calculated 297.16, found 297.1

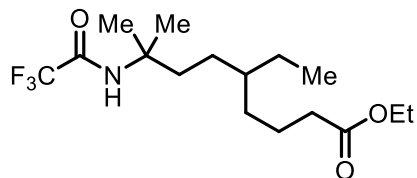

**3da** - ethyl 5-ethyl-8-methyl-8-(2,2,2-trifluoroacetamido)nonanoate

Prepared using procedure B from compound **2d**.

Yield 82%, contains 7% impurity of unsaturated product

$^1\text{H NMR}$  (500 MHz, Chloroform-*d*)  $\delta$  5.99 (s, 1H), 4.12 (q,  $J = 7.1$  Hz, 2H), 2.27 (t,  $J = 7.4$  Hz, 2H), 1.70 – 1.57 (m, 5H), 1.40 (dz, 6H), 1.35 – 1.21 (m, 9H), 0.85 (t,  $J = 7.1$  Hz, 3H).

$^{13}\text{C NMR}$  (126 MHz, Chloroform-*d*)  $\delta$  173.77, 156.17 (q,  $J = 35.7$  Hz), 115.79 (q,  $J = 289.7$  Hz), 60.45, 56.04, 43.60, 35.15, 34.64, 34.42, 27.46, 27.07, 26.94, 22.18, 14.42, 10.77.

$^{19}\text{F NMR}$  (471 MHz, Chloroform-*d*)  $\delta$  -75.35.

IR (film)  $\nu_{\text{max}}$  3330, 3086, 2966, 2936, 2876, 1711, 1551, 1179, 1152, 723

LRMS (EI) [ $\text{C}_{15}\text{H}_{26}\text{F}_3\text{NO}_3$ ]  $m/z$  calculated 325.19, found 325.3

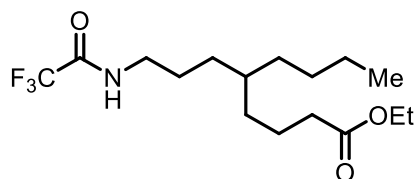

**3ea** - ethyl 5-(3-(2,2,2-trifluoroacetamido)propyl)nonanoate

Prepared using procedure B from compound **2e**.

Yield 55%, contains 4% impurity of unsaturated product

$^1\text{H NMR}$  (500 MHz, Chloroform-*d*)  $\delta$  6.46 (s, 1H), 4.15 (q,  $J = 7.1$  Hz, 2H), 3.37 (q,  $J = 6.8$  Hz, 2H), 2.30 (t,  $J = 7.3$  Hz, 2H), 2.25 – 1.90 (m, 1H), 1.64 – 1.51 (m, 3H), 1.44 – 1.16 (m, 14H), 0.91 (t,  $J = 7.0$  Hz, 3H).

$^{13}\text{C NMR}$  (126 MHz, Chloroform-*d*)  $\delta$  174.03, 157.38 (q,  $J = 36.5$  Hz), 116.08 (q,  $J = 288.1$  Hz), 60.47, 40.50, 36.98, 34.69, 33.20, 32.93, 30.40, 29.01, 26.15, 23.20, 22.02, 14.42, 14.27.

$^{19}\text{F NMR}$  (471 MHz, Chloroform-*d*)  $\delta$  -75.04.

IR (film)  $\nu_{\text{max}}$  3321, 3102, 2929, 2861, 1705, 1554, 1156, 722

LRMS (EI) [ $\text{C}_{16}\text{H}_{28}\text{F}_3\text{NO}_3$ ]  $m/z$  calculated 339.20, found 339.2

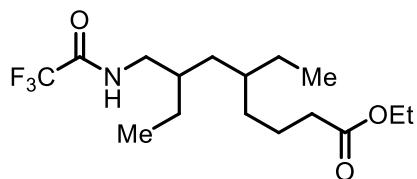

**3fa** - ethyl 5-ethyl-7-((2,2,2-trifluoroacetamido)methyl)nonanoate

Prepared using procedure B from compound **2f**.

Yield 63% 1:1 dr

$^1\text{H NMR}$  (500 MHz, Chloroform-*d*)  $\delta$  6.42 (s, 1H), 4.12 (qd,  $J = 7.2, 1.4$  Hz, 2H), 3.41 – 3.12 (m, 2H), 2.36 – 2.21 (m, 2H), 1.68 – 1.47 (m, 3H), 1.40 – 1.08 (m, 12H), 0.99 – 0.78 (m, 6H).

$^{13}\text{C NMR}$  (126 MHz, Chloroform-*d*)  $\delta$  173.90, 157.69 (q,  $J = 18.6$  Hz), 116.13 (q,  $J = 287.9$  Hz), 60.51, 43.26, 41.79, 38.09, 35.88, 34.56, 32.90, 26.00, 24.72, 21.68, 20.98, 14.38, 10.77.

$^{19}\text{F NMR}$  (471 MHz, Chloroform-*d*)  $\delta$  -74.92, -75.01.

IR (film)  $\nu_{\text{max}}$  3321, 3104, 2961, 2932, 2875, 1705, 1554, 1156, 1032, 723

LRMS (EI) [ $\text{C}_{16}\text{H}_{28}\text{F}_3\text{NO}_3$ ]  $m/z$  calculated 339.20, found 339.2

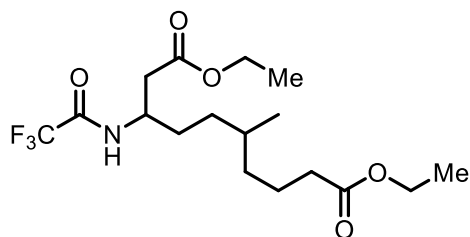

**3ga** - diethyl 6-methyl-3-(2,2,2-trifluoroacetamido)decanedioate

Prepared using procedure B from compound **2g**.

Yield 70% 1:1 dr

Mix of diastereomers ~2:1 Maj:Min, <sup>1</sup>H peaks unresolved, <sup>13</sup>C Major diastereomer selected, contains 6% impurity of unsaturated product

<sup>1</sup>H NMR (500 MHz, Chloroform-*d*) δ 7.20 (s, 1H), 4.32 (dh, *J* = 9.6, 5.0 Hz, 1H), 4.15 (dq, *J* = 26.6, 7.1 Hz, 4H), 2.67 – 2.50 (m, 2H), 2.31 – 2.23 (m, 2H), 1.73 – 1.63 (m, 1H), 1.60 – 1.49 (m, 2H), 1.48 – 1.38 (m, 1H), 1.39 – 1.22 (m, 11H), 0.89 – 0.80 (m, 3H).

<sup>13</sup>C NMR (126 MHz, Chloroform-*d*) δ 173.83, 171.75, 156.74 (q, *J* = 36.8 Hz), 116.03 (q, *J* = 288.1 Hz), 61.29, 60.46, 45.02, 37.91, 37.48, 35.71, 34.58, 32.15, 25.72, 21.79, 14.42, 14.29, 10.58. <sup>19</sup>F NMR (471 MHz, Chloroform-*d*) δ -75.17, -75.22.

IR (film)  $\nu_{\max}$  3321, 3096, 2964, 2937, 2876, 1710, 1553, 1158, 911, 729, 648

LRMS (EI) [C<sub>17</sub>H<sub>28</sub>F<sub>3</sub>NO<sub>5</sub>] *m/z* calculated 383.19, found 383.2

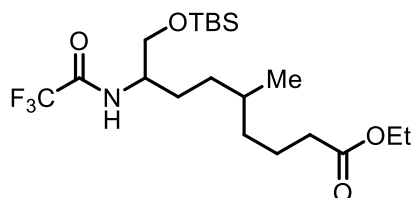

**3ha** - ethyl 9-((tert-butyldimethylsilyl)oxy)-5-methyl-8-(2,2,2-trifluoroacetamido)nonanoate

Prepared using procedure B from compound **2h**.

Yield 49% 1:1 dr

3:1 mix of diastereomers isolated, <sup>1</sup>H peaks unresolved, <sup>13</sup>C Major diastereomer selected

<sup>1</sup>H NMR (400 MHz, Chloroform-*d*) δ 6.46 (d, *J* = 8.8 Hz, 1H), 4.14 (q, *J* = 7.1 Hz, 2H), 4.08 (td, *J* = 7.4, 6.5, 3.5 Hz, 1H), 3.74 – 3.58 (m, 2H), 2.33 – 2.26 (m, 2H), 1.68 – 1.49 (m, 4H), 1.45 – 1.31 (m, 5H), 1.27 (t, *J* = 7.1 Hz, 3H), 0.96 – 0.82 (m, 12H), 0.08 (d, *J* = 1.7 Hz, 6H).

<sup>13</sup>C NMR (126 MHz, Chloroform-*d*) δ 173.65, 156.55 (q, *J* = 36.7 Hz), 115.94 (q, *J* = 288.2 Hz), 63.74, 60.24, 49.29, 35.29, 34.72, 34.50, 32.56, 32.28, 25.74, 21.73, 18.18, 14.25, 10.43, -5.59 (d, *J* = 12.2 Hz).

<sup>19</sup>F NMR (376 MHz, Chloroform-*d*) δ -76.09, -76.12.

IR (film)  $\nu_{\max}$  3317, 2932, 2860, 1708, 1553, 1162, 838, 778, 726

LRMS (EI) [C<sub>20</sub>H<sub>38</sub>F<sub>3</sub>NO<sub>4</sub>Si] *m/z* calculated 441.61, found 442.3

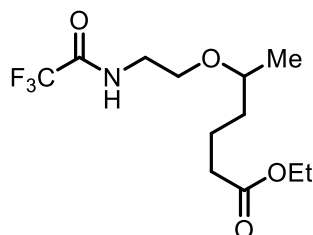

**3ia** - ethyl 5-(2-(2,2,2-trifluoroacetamido)ethoxy)hexanoate

Prepared using procedure B from compound **2i**.

Yield 62%

$^1\text{H}$  NMR (500 MHz, Chloroform-*d*)  $\delta$  6.93 (s, 1H), 4.16 (q,  $J = 7.1$  Hz, 2H), 3.66 (ddd,  $J = 9.3, 5.9, 3.4$  Hz, 1H), 3.57 (m, 2H), 3.52 – 3.43 (m, 2H), 2.34 (td,  $J = 7.3, 3.0$  Hz, 2H), 1.78 – 1.66 (m, 2H), 1.60 – 1.45 (m, 2H), 1.28 (t,  $J = 7.1$  Hz, 3H), 1.17 (d,  $J = 6.1$  Hz, 3H).

$^{13}\text{C}$  NMR (126 MHz, Chloroform-*d*)  $\delta$  173.64, 157.21 (q,  $J = 37.0$  Hz), 115.89 (q,  $J = 288.1, 287.6$  Hz), 75.63, 65.71, 60.38, 40.07, 35.68, 34.07, 20.82, 19.41, 14.22.

$^{19}\text{F}$  NMR (471 MHz, Chloroform-*d*)  $\delta$  -75.09.

IR (film)  $\nu_{\text{max}}$  3327, 3099, 2930, 2861, 1709, 1555, 1178, 1151, 722, 654, 549

LRMS (EI)  $[\text{C}_{13}\text{H}_{22}\text{F}_3\text{NO}_4]$   $m/z$  calculated 299.13, found 299.1

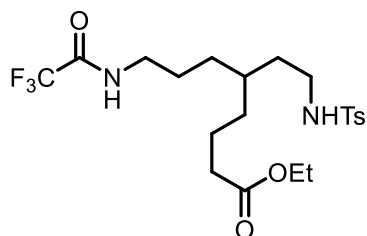

**3ja** - ethyl 5-(2-((4-methylphenyl)sulfonamido)ethyl)-8-(2,2,2-trifluoroacetamido)octanoate

Prepared using procedure B from compound **2j**.

Yield 49%

$^1\text{H}$  NMR (500 MHz, Chloroform-*d*)  $\delta$  7.68 – 7.64 (m, 2H), 7.32 – 7.28 (m, 2H), 6.61 (s, 1H), 6.42 (s, 1H), 4.12 (q,  $J = 7.1$  Hz, 2H), 3.37 (p,  $J = 6.5$  Hz, 2H), 3.11 (p, 2H), 2.42 (s, 3H), 2.34 (t,  $J = 7.2$  Hz, 2H), 1.89 – 1.76 (m, 2H), 1.63 – 1.53 (m, 4H), 1.36 (m, 5H), 1.25 (t,  $J = 7.2$  Hz, 4H).

$^{13}\text{C}$  NMR (101 MHz, Chloroform-*d*)  $\delta$  173.09, 157.26 (q,  $J = 36.8$  Hz), 143.25, 136.56, 129.70, 127.09, 115.91 (q,  $J = 287.9$  Hz), 60.54, 48.38, 47.85, 39.54, 31.10, 28.58, 28.25, 25.67, 25.57, 24.15, 21.48, 14.19.

$^{19}\text{F}$  NMR (471 MHz, Chloroform-*d*)  $\delta$  -74.99.

IR (film)  $\nu_{\text{max}}$  3320, 3101, 2924, 2856, 1706, 1554, 1159, 863, 722

LRMS (ESI+APCI)  $[\text{C}_{21}\text{H}_{31}\text{F}_3\text{N}_2\text{O}_5\text{S}]$   $m/z$  ( $[\text{M}+\text{H}]^+$ ) calculated 481.19 found 481.1

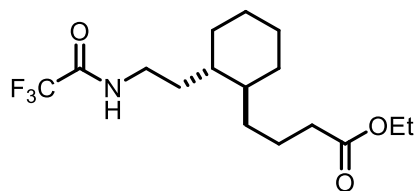

**3ka** - ethyl 4-((1S,2S)-2-(2-(2,2,2-trifluoroacetamido)ethyl)cyclohexyl)butanoate

Prepared using procedure B from compound **1k**.

Yield 68% >20:1 dr

$^1\text{H}$  NMR (400 MHz, Chloroform-*d*)  $\delta$  6.67 (s, 1H), 4.11 (q,  $J = 7.2$  Hz, 2H), 3.46 – 3.21 (m, 2H), 2.41 – 2.09 (m, 2H), 1.88 – 1.61 (m, 6H), 1.59 – 1.28 (m, 4H), 1.24 (t,  $J = 7.2$  Hz, 3H), 1.22 – 1.15 (m, 2H), 1.14 – 0.91 (m, 4H).

$^{13}\text{C}$  NMR (101 MHz, Chloroform-*d*)  $\delta$  174.15, 157.38 (q,  $J = 36.5$  Hz), 116.09 (q,  $J = 287.9$  Hz), 60.47, 41.06, 38.89, 37.96, 34.54, 32.66, 32.44, 31.85, 31.56, 26.16, 26.12, 21.30, 14.37.

$^{19}\text{F}$  NMR (376 MHz, Chloroform-*d*)  $\delta$  -75.95.

IR (film)  $\nu_{\text{max}}$  3320, 3101, 2924, 2856, 1706, 1554, 1159, 722

LRMS (EI)  $[\text{C}_{16}\text{H}_{26}\text{F}_3\text{NO}_3]$   $m/z$  calculated 337.19, found 337.2

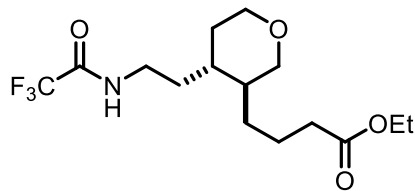

**3la** - ethyl 4-((3S,4R)-4-(2-(2,2,2-trifluoroacetamido)ethyl)tetrahydro-2H-pyran-3-yl)butanoate

Prepared using procedure B from compound **2l**.

Yield 52% >20:1 dr, contains 15% impurity of unsaturated product

<sup>1</sup>H NMR (500 MHz, Chloroform-*d*) δ 6.56 (s, 1H), 4.13 (q, *J* = 7.1 Hz, 2H), 3.94 (qd, *J* = 11.7, 4.1 Hz, 2H), 3.43 – 3.31 (m, 3H), 3.12 – 3.03 (m, 1H), 2.37 – 2.21 (m, 2H), 2.02 – 1.88 (m, 1H), 1.75 – 1.65 (m, 2H), 1.58 – 1.42 (m, 3H), 1.41 – 1.31 (m, 3H), 1.26 (t, *J* = 7.1 Hz, 3H), 1.21 – 1.10 (m, 1H).

<sup>13</sup>C NMR (126 MHz, Chloroform-*d*) δ 173.81, 157.49 (q, *J* = 36.8 Hz), 116.06 (q, *J* = 288.3, 287.0 Hz), 71.91, 68.00, 60.64, 40.37, 37.53, 36.82, 34.35, 32.13, 31.45, 28.84, 21.68, 14.40.

<sup>19</sup>F NMR (471 MHz, Chloroform-*d*) δ -74.99.

IR (film)  $\nu_{\max}$  3307, 3092, 2928, 2854, 1709, 1555, 1153, 1096, 723

LRMS (EI) [C<sub>15</sub>H<sub>24</sub>F<sub>3</sub>NO<sub>4</sub>] *m/z* calculated 480.19, found 481.1

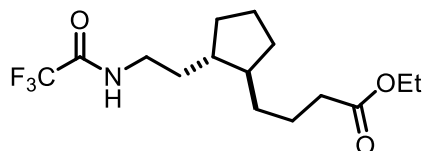

**3ma** - ethyl 4-(2-(2-(2,2,2-trifluoroacetamido)ethyl)cyclopentyl)butanoate

Prepared using procedure B from compound **2m**.

Yield 58% 16:1 dr, 9:1 mix of diastereomers isolated, <sup>1</sup>H peaks unresolved, <sup>13</sup>C Major diastereomer selected

<sup>1</sup>H NMR (500 MHz, Chloroform-*d*) δ 6.35 (s, 1H), 4.12 (q, *J* = 7.1 Hz, 2H), 3.48 – 3.27 (m, 2H), 2.39 – 2.20 (m, 2H), 1.89 – 1.79 (m, 2H), 1.78 – 1.62 (m, 2H), 1.61 – 1.45 (m, 5H), 1.43 – 1.29 (m, 3H), 1.25 (t, *J* = 7.1 Hz, 3H), 1.22 – 1.11 (m, 2H).

<sup>13</sup>C NMR (126 MHz, Chloroform-*d*) δ 173.98, 157.28 (q, *J* = 36.4 Hz), 116.05 (q, *J* = 287.9 Hz), 60.45, 45.84, 43.46, 39.51, 34.64, 34.45, 34.42, 23.93, 23.83, 14.43.

<sup>19</sup>F NMR (471 MHz, Chloroform-*d*) δ -75.06.

IR (film)  $\nu_{\max}$  3322, 3102, 2943, 2868, 1708, 1556, 1180, 1161, 723

LRMS (EI) [C<sub>15</sub>H<sub>24</sub>F<sub>3</sub>NO<sub>3</sub>] *m/z* calculated 337.19, found 337.2

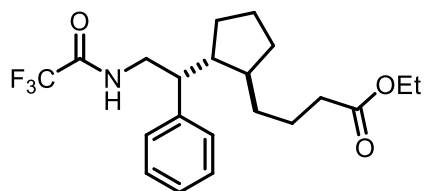

**3na** - ethyl 4-(2-(1-phenyl-2-(2,2,2-trifluoroacetamido)ethyl)cyclopentyl)butanoate

Prepared using procedure B from compound **2n**.

Yield 37% >20:1:1:1 dr

<sup>1</sup>H NMR (400 MHz, Chloroform-*d*) δ 7.35 (dd, *J* = 8.1, 6.5 Hz, 2H), 7.32 – 7.25 (m, 1H), 7.18 – 7.12 (m, 2H), 6.07 (s, 1H), 4.17 (q, *J* = 7.2 Hz, 2H), 3.96 (ddd, *J* = 12.8, 7.3, 4.8 Hz, 1H), 3.39 (ddd, *J* = 13.4, 10.7, 4.5 Hz, 1H), 2.79 (ddd, *J* = 10.6, 8.2, 4.8 Hz, 1H), 2.35 (td, *J* = 7.3, 5.3 Hz, 2H), 1.84 – 1.37 (m, 10H), 1.31 – 1.27 (m, 5H), 1.19 – 1.11 (m, 1H), 0.95 – 0.79 (m, 1H).

<sup>13</sup>C NMR (101 MHz, Chloroform-*d*) δ 173.73, 156.97 (q, *J* = 36.3, 35.8 Hz), 140.18, 128.79, 128.44, 127.24, 120.28 – 111.15 (q, *J* = 287.7 Hz), 60.30, 49.14, 48.56, 43.91, 42.48, 35.67, 34.41, 31.81, 29.93, 24.06, 23.64, 14.26.

<sup>19</sup>F NMR (376 MHz, Chloroform-*d*) δ -76.13.

IR (film)  $\nu_{\max}$  3324, 3088, 3029, 2938, 2868, 1711, 1554, 1177, 1160, 703  
LRMS (EI) [C<sub>21</sub>H<sub>28</sub>F<sub>3</sub>NO<sub>3</sub>] m/z calculated 339.17, found 339.2

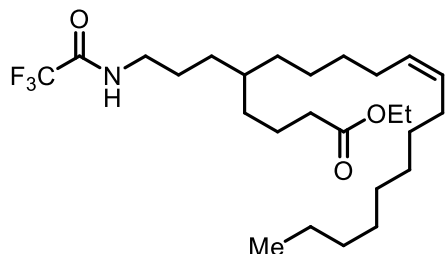

**30a** - ethyl (Z)-5-(3-(2,2,2-trifluoroacetamido)propyl)nonadec-10-enoate

Prepared using procedure B from compound **20**.

Yield 35%

<sup>1</sup>H NMR (500 MHz, Chloroform-*d*)  $\delta$  6.39 (s, 1H), 5.43 – 5.25 (m, 1H), 4.13 (qd,  $J$  = 7.1, 1.7 Hz, 2H), 3.36 (dq,  $J$  = 13.5, 6.8 Hz, 2H), 2.35 – 2.19 (m, 2H), 2.07 – 1.90 (m, 4H), 1.65 – 1.46 (m, 7H), 1.33 – 1.19 (m, 38H), 0.88 (t,  $J$  = 6.8 Hz, 5H).

<sup>13</sup>C NMR (126 MHz, Chloroform-*d*)  $\delta$  173.94, 130.75, 130.29, 60.54, 38.10, 37.00, 35.15, 34.52, 33.45, 33.42, 32.84, 32.80, 32.76, 32.74, 32.09, 29.84, 29.68, 29.51, 29.38, 22.87, 21.93, 21.92, 14.43, 14.30.

<sup>19</sup>F NMR (471 MHz, Chloroform-*d*)  $\delta$  -75.04.

IR (film)  $\nu_{\max}$  3320, 3100, 2924, 2854, 1707, 1553, 1161, 722

LRMS (ESI+APCI) [C<sub>26</sub>H<sub>46</sub>F<sub>3</sub>NO<sub>3</sub>] m/z ([M+H]<sup>+</sup>) calculated 478.34 found 478.3

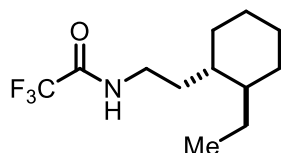

**3kb** - N-(2-(2-ethylcyclohexyl)ethyl)-2,2,2-trifluoroacetamide

Prepared using procedure B from compound **1k** and commercially available bromoethane.

Yield 65% 14:1 trans:cis dr

Mix of diastereomers (1.6:1 isolated)

<sup>1</sup>H NMR (400 MHz, Chloroform-*d*)  $\delta$  6.30 (s, 1H), 3.52 – 3.26 (m, 2H), 1.89 – 1.68 (m, 5H), 1.63 – 1.46 (m, 2H), 1.46 – 1.36 (m, 1H), 1.30 – 1.13 (m, 4H), 1.08 – 0.93 (m, 3H), 0.86 (t,  $J$  = 7.5 Hz, 3H).

<sup>13</sup>C NMR (126 MHz, Chloroform-*d*)  $\delta$  157.08 (q,  $J$  = 36.4 Hz), 115.87 (q,  $J$  = 287.9 Hz), 42.48, 38.79, 37.89, 33.02, 32.55, 31.68, 30.84, 26.07, 26.02, 25.58, 10.44.

<sup>19</sup>F NMR (376 MHz, Chloroform-*d*)  $\delta$  -75.99, -76.01.

IR (film)  $\nu_{\max}$  3302, 3106, 2923, 2855, 1700, 1557, 1179, 1157, 722

LRMS (EI) [C<sub>12</sub>H<sub>20</sub>F<sub>3</sub>NO] m/z calculated 225.13, found 225.2

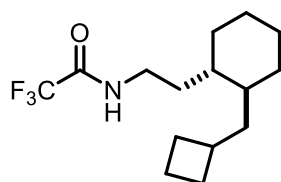

**3kc** - N-(2-(2-(cyclobutylmethyl)cyclohexyl)ethyl)-2,2,2-trifluoroacetamide

Prepared using procedure B from compound **1k** and commercially available (Bromomethyl)cyclobutane.

Yield 42% >20:1 dr



$^1\text{H}$  NMR (500 MHz, Chloroform-*d*)  $\delta$  6.24 (s, 1H), 3.43 (ddt,  $J = 15.2, 10.6, 5.2$  Hz, 1H), 3.30 (ddt,  $J = 13.0, 9.6, 6.3$  Hz, 1H), 2.34 (qd,  $J = 8.3, 6.2$  Hz, 1H), 2.01 (ddq,  $J = 22.6, 11.3, 3.9$  Hz, 2H), 1.87 – 1.71 (m, 5H), 1.70 – 1.49 (m, 5H), 1.36 (dt,  $J = 16.9, 8.3, 4.2$  Hz, 1H), 1.17 (m, 3H), 1.01 (m, 3H), 0.89 (qd,  $J = 11.4, 10.8, 5.3$  Hz, 1H).

$^{13}\text{C}$  NMR (101 MHz, Chloroform-*d*)  $\delta$  157.06 (q,  $J = 36.7$  Hz), 115.88 (q,  $J = 287.9$  Hz), 40.92, 39.97, 39.58, 37.95, 33.91, 32.75, 31.65, 29.71, 28.71, 25.92, 25.89, 18.64.

$^{19}\text{F}$  NMR (471 MHz, Chloroform-*d*)  $\delta$  -75.05.

IR (film)  $\nu_{\text{max}}$  3300, 3106, 2924, 2854, 1700, 1557, 1157, 1178, 722

LRMS (EI)  $[\text{C}_{15}\text{H}_{24}\text{F}_3\text{NO}]$   $m/z$  calculated 291.18, found 291.1

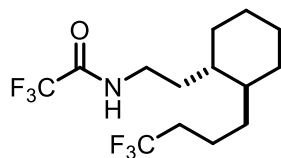

### **3kd** - 2,2,2-trifluoro-N-(2-(2-(4,4,4-trifluorobutyl)cyclohexyl)ethyl)acetamide

Prepared using procedure B from compound **1k** and commercially available 4-bromo-1,1,1-trifluorobutane.

Yield 57% >20:1 dr

$^1\text{H}$  NMR (500 MHz, Chloroform-*d*)  $\delta$  6.24 (s, 1H), 3.44 (ddt,  $J = 13.6, 9.8, 5.5$  Hz, 1H), 3.30 (ddt,  $J = 13.3, 9.2, 6.2$  Hz, 1H), 2.15 – 1.94 (m, 2H), 1.87 – 1.74 (m, 3H), 1.74 – 1.67 (m, 2H), 1.67 – 1.51 (m, 3H), 1.51 – 1.31 (m, 2H), 1.26 – 1.14 (m, 3H), 1.12 – 0.92 (m, 3H).

$^{13}\text{C}$  NMR (126 MHz, Chloroform-*d*)  $\delta$  157.31 (q,  $J = 36.9$  Hz), 127.35 (d,  $J = 276.5$  Hz), 116.02 (q,  $J = 287.9$  Hz), 41.11, 39.37, 38.00, 34.24 (q,  $J = 28.3$  Hz), 32.78, 32.46, 31.71, 31.36, 26.00 (d,  $J = 3.2$  Hz), 19.00 (q,  $J = 3.0$  Hz).

$^{19}\text{F}$  NMR (471 MHz, Chloroform-*d*)  $\delta$  -65.43 (t,  $J = 10.9$  Hz), -75.08.

IR (film)  $\nu_{\text{max}}$  3450, 3305, 3106, 2926, 2858, 1701, 1557, 1253, 1180, 1151, 722, 658

LRMS (EI)  $[\text{C}_{14}\text{H}_{21}\text{F}_6\text{NO}]$   $m/z$  calculated 333.15, found 333.2

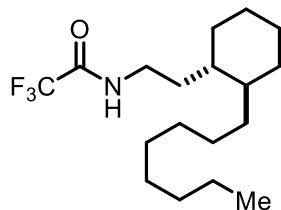

### **3ke** - 2,2,2-trifluoro-N-(2-(2-(2-octyl)cyclohexyl)ethyl)acetamide

Prepared using procedure B from compound **1k** and commercially available 1-bromooctane.

Yield 62% >20:1 dr

$^1\text{H}$  NMR (400 MHz, Chloroform-*d*)  $\delta$  6.19 (s, 1H), 3.51 – 3.21 (m, 2H), 1.88 – 1.62 (m, 5H), 1.53 – 0.94 (m, 24H), 0.8f8 (t,  $J = 5.9$  Hz, 3H).

$^{13}\text{C}$  NMR (101 MHz, Chloroform-*d*)  $\delta$  157.23 (q,  $J = 36.9$  Hz), 116.06 (q,  $J = 288.1$  Hz), 41.44, 39.53, 38.12, 33.51, 32.84, 32.10, 31.88, 31.69, 30.33, 29.87, 29.53, 26.50, 26.19, 22.87, 14.29.

$^{19}\text{F}$  NMR (471 MHz, Chloroform-*d*)  $\delta$  -75.07.

IR (film)  $\nu_{\text{max}}$  3300, 3106, 2922, 2854, 1700, 1558, 1161, 1180, 722

LRMS (EI)  $[\text{C}_{18}\text{H}_{32}\text{F}_3\text{NO}]$   $m/z$  calculated 335.24, found 335.3

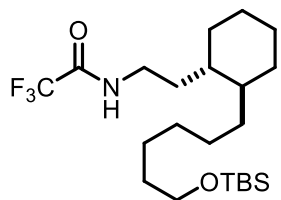

**3kf** - N-(2-(2-(6-((tert-butyl)dimethylsilyloxy)hexyl)cyclohexyl)ethyl)-2,2,2-trifluoroacetamide

Prepared using procedure B from compound **1k** and commercially available ((6-bromohexyl)oxy)(tert-butyl)dimethylsilane.

Yield 48% >20:1 dr

$^1\text{H NMR}$  (500 MHz, Chloroform-*d*)  $\delta$  6.24 (s, 1H), 3.59 (t,  $J = 6.6$  Hz, 2H), 3.47 – 3.38 (m, 1H), 3.30 (ddt,  $J = 13.0$ , 9.5, 6.3 Hz, 1H), 1.79 (ddt,  $J = 23.3$ , 13.4, 2.9 Hz, 3H), 1.72 – 1.64 (m, 2H), 1.54 – 1.42 (m, 3H), 1.41 – 1.15 (m, 9H), 1.15 – 0.91 (m, 5H), 0.89 (s, 9H), 0.04 (s, 5H).

$^{13}\text{C NMR}$  (126 MHz, Chloroform-*d*)  $\delta$  157.24 (q,  $J = 36.6$  Hz), 116.05 (q,  $J = 288.0$  Hz), 63.50, 41.41, 39.50, 38.10, 33.40, 33.04, 32.80, 31.84, 31.66, 30.07, 26.44, 26.18, 26.17, 26.03, 18.57, -5.08.

$^{19}\text{F NMR}$  (471 MHz, Chloroform-*d*)  $\delta$  -75.05.

IR (film)  $\nu_{\text{max}}$  3307, 3105, 2928, 2856, 1703, 1207, 1164, 908, 834, 776, 731

LRMS (ESI+APCI) [ $\text{C}_{22}\text{H}_{42}\text{F}_3\text{NO}_2\text{Si}$ ]  $m/z$  ([ $\text{M}+\text{H}$ ] $^+$ ) calculated 438.29 found 438.3

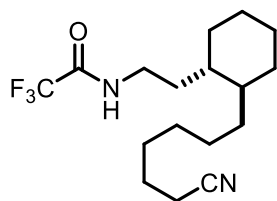**3kg** - N-(2-(2-(6-cyanoheptyl)cyclohexyl)ethyl)-2,2,2-trifluoroacetamide

Prepared using procedure B from compound **1k** and commercially available 7-bromoheptanenitrile.

Yield 48% >20:1 dr

$^1\text{H NMR}$  (500 MHz, Chloroform-*d*)  $\delta$  6.48 (s, 1H), 3.41 (ddt,  $J = 13.5$ , 10.4, 5.5 Hz, 1H), 3.28 (ddt,  $J = 13.0$ , 9.7, 6.2 Hz, 1H), 2.34 (t,  $J = 7.0$  Hz, 2H), 1.85 – 1.61 (m, 7H), 1.51 – 1.27 (m, 4H), 1.19 (dddd,  $J = 10.4$ , 8.5, 4.6, 2.3 Hz, 2H), 1.11 – 0.91 (m, 2H).

$^{13}\text{C NMR}$  (126 MHz, Chloroform-*d*)  $\delta$  157.05 (q,  $J = 36.7$  Hz), 119.96, 115.94 (q,  $J = 287.9$  Hz), 41.37, 39.56, 38.14, 33.19, 32.89, 31.98, 31.81, 29.23, 28.73, 26.31, 26.02, 26.03, 25.49, 17.46.

$^{19}\text{F NMR}$  (471 MHz, Chloroform-*d*)  $\delta$  -75.05.

IR (film)  $\nu_{\text{max}}$  3318, 3104, 2923, 2854, 2252, 1707, 1556, 1179, 1159, 909, 729, 648

LRMS (EI) [ $\text{C}_{17}\text{H}_{27}\text{F}_3\text{N}_2\text{O}$ ]  $m/z$  calculated 332.21, found 332.2

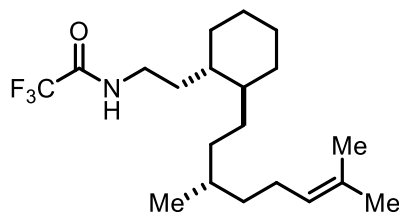**3kh** - N-(2-(2-(3,7-dimethyloct-6-en-1-yl)cyclohexyl)ethyl)-2,2,2-trifluoroacetamide

Prepared using procedure B from compound **1k** and commercially available (S)-8-bromo-2,6-dimethyloct-2-ene.

Yield 34% 20:1 trans:cis, 1:1 dr, contains 2% impurity of unsaturated product

$^1\text{H NMR}$  (400 MHz, Chloroform-*d*)  $\delta$  6.19 (s, 1H), 5.10 (t,  $J = 6.8$  Hz, 1H), 3.37 (ddt,  $J = 47.3$ , 13.7, 8.2 Hz, 2H), 1.96 (s, 2H), 1.84 – 1.66 (m, 7H), 1.56 (s, 3H), 1.30 (dd,  $J = 25.8$ , 8.8 Hz, 5H), 1.22 – 1.08 (m, 5H), 1.05 – 0.96 (m, 3H), 0.91 – 0.80 (m, 5H).

$^{13}\text{C NMR}$  (101 MHz, Chloroform-*d*)  $\delta$  157.23 (q,  $J = 36.9$  Hz), 131.92, 124.20, 116.06 (q,  $J = 288.1$  Hz), 41.44, 39.53, 38.12, 33.51, 32.84, 32.10, 31.88, 31.69, 30.33, 29.87, 29.53, 26.50, 26.19, 26.19, 22.87, 14.29.

$^{19}\text{F NMR}$  (471 MHz, Chloroform-*d*)  $\delta$  -75.04.

IR (film)  $\nu_{\max}$  3302, 3105, 2921, 2854, 1702, 1562, 1161, 1180, 723  
LRMS (EI) [C<sub>20</sub>H<sub>34</sub>F<sub>3</sub>NO] m/z calculated 361.26, found 361.3

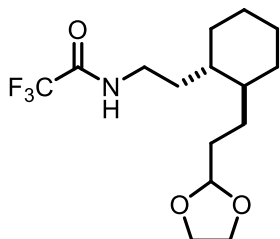

**3ki** - N-(2-(2-(2-(1,3-dioxolan-2-yl)ethyl)cyclohexyl)ethyl)-2,2,2-trifluoroacetamide

Prepared using procedure B from compound **1k** and commercially available 2-(2-bromoethyl)-1,3-dioxolane. Due to coelution with homocoupled bromide product with desired product, the integrations for some <sup>1</sup>H NMR peaks have inflated integrations. The yield was adjusted according to normalized integrations.

Yield 61% >20:1 dr

<sup>1</sup>H NMR (400 MHz, Chloroform-*d*)  $\delta$  6.37 (s, 1H), 5.10 – 4.69 (m, 2H), 4.00 – 3.90 (m, 4H), 3.90 – 3.78 (m, 4H), 3.48 – 3.23 (m, 2H), 1.89 – 1.75 (m, 2H), 1.68 (dddd, *J* = 12.1, 8.8, 5.2, 3.1 Hz, 6H), 1.46 (ddd, *J* = 7.6, 4.7, 3.4 Hz, 3H), 1.40 – 1.31 (m, 1H), 1.25 – 1.15 (m, 2H), 1.11 (ddd, *J* = 8.8, 6.1, 3.1 Hz, 1H), 0.98 (t, *J* = 11.0 Hz, 1H).

<sup>13</sup>C NMR (101 MHz, Chloroform-*d*)  $\delta$  157.26 (d, *J* = 36.7 Hz), 116.06 (d, *J* = 287.6 Hz), 104.68, 65.00, 40.99, 39.19, 38.01, 33.99, 32.62, 31.72, 31.45, 30.51, 26.07, 26.04, 24.17.

<sup>19</sup>F NMR (376 MHz, Chloroform-*d*)  $\delta$  -75.94.

IR (film)  $\nu_{\max}$  3312, 3097, 2920, 2853, 1708, 1559, 1153, 1178, 1035, 721

LRMS (EI) [C<sub>15</sub>H<sub>24</sub>F<sub>3</sub>NO<sub>3</sub>] m/z calculated 323.17, found 323.1

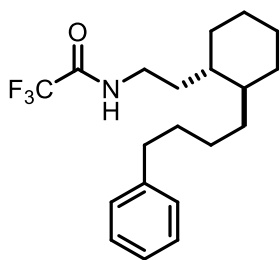

**3kj** - 2,2,2-trifluoro-N-(2-(2-(4-phenylbutyl)cyclohexyl)ethyl)acetamide

Prepared using procedure B from compound **1k** and commercially available (4-bromobutyl)benzene.

Yield 54% >20:1 dr

<sup>1</sup>H NMR (500 MHz, Chloroform-*d*)  $\delta$  7.32 – 7.24 (m, 2H), 7.22 – 7.14 (m, 3H), 6.27 (s, 1H), 3.40 (ddt, *J* = 14.9, 9.9, 5.0 Hz, 1H), 3.28 (ddt, *J* = 13.1, 9.5, 6.3 Hz, 1H), 2.62 (ddd, *J* = 8.6, 6.7, 4.7 Hz, 2H), 1.72-1.83 (m, 3H), 1.72 – 1.45

<sup>13</sup>C NMR (126 MHz, Chloroform-*d*)  $\delta$  157.24 (q, *J* = 36.6 Hz), 142.89, 128.58, 128.41, 125.77, 116.04 (q, *J* = 287.9 Hz), 41.35, 39.45, 38.07, 36.07, 33.27, 32.75, 31.95, 31.81, 31.67, 26.15, 26.14, 26.02.

<sup>19</sup>F NMR (471 MHz, Chloroform-*d*)  $\delta$  -75.02.

IR (film)  $\nu_{\max}$  3304, 3087, 3063, 3027, 2923, 2854, 1701, 1559, 1159, 739, 724, 698

LRMS (EI) [C<sub>20</sub>H<sub>28</sub>F<sub>3</sub>NO] m/z calculated 355.21, found 355.2

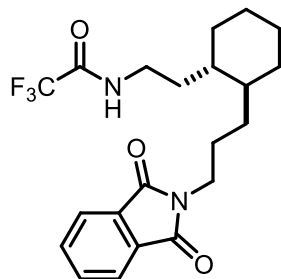

**3kk** - N-(2-((1S,2S)-2-(3-(1,3-dioxisoindolin-2-yl)propyl)cyclohexyl)ethyl)-2,2,2-trifluoroacetamide

Prepared using procedure B from compound **1k** and commercially available 2-(3-bromopropyl)isoindoline-1,3-dione.

Yield 69% >20:1 dr

$^1\text{H}$  NMR (400 MHz, Chloroform-*d*)  $\delta$  7.83 (dd,  $J = 5.3, 3.1$  Hz, 2H), 7.71 (dd,  $J = 5.4, 3.1$  Hz, 2H), 6.54 (s, 1H), 3.65 (t,  $J = 6.7$  Hz, 2H), 3.36 (dh,  $J = 13.6, 7.5, 7.1$  Hz, 2H), 1.81 – 1.49 (m, 8H), 1.37 (dq,  $J = 13.7, 8.0$  Hz, 1H), 1.25 – 1.06 (m, 5H), 0.98 (p,  $J = 10.0$  Hz, 2H).

$^{13}\text{C}$  NMR (101 MHz, Chloroform-*d*)  $\delta$  168.74, 157.29 (q,  $J = 36.7$  Hz), 134.14, 132.26, 123.36, 116.09 (q,  $J = 288.0$  Hz), 40.57, 39.11, 38.44, 37.94, 32.58, 31.54, 31.37, 30.28, 25.94, 25.92, 25.25.

$^{19}\text{F}$  NMR (376 MHz, Chloroform-*d*)  $\delta$  -75.87.

IR (film)  $\nu_{\text{max}}$  3339, 3091, 2922, 2852, 2256, 1772, 1704, 1552, 1397, 1156, 909, 718, 529

LRMS (ESI+APCI)  $[\text{C}_{21}\text{H}_{25}\text{F}_3\text{N}_2\text{O}_3]$   $m/z$  ( $[\text{M}+\text{H}]^+$ ) calculated 411.18 found 411.2

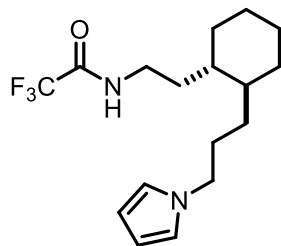

**3kl** - N-(2-((2-(3-(1H-pyrrol-1-yl)propyl)cyclohexyl)ethyl)-2,2,2-trifluoroacetamide

Prepared using procedure B from compound **1k** and commercially available 1-(3-bromopropyl)-1H-pyrrole.

Yield 56% >20:1 dr

$^1\text{H}$  NMR (500 MHz, Chloroform-*d*)  $\delta$  6.66 (t,  $J = 2.1$  Hz, 2H), 6.20 (s, 1H), 6.13 (t,  $J = 2.1$  Hz, 2H), 3.90 (ddd,  $J = 13.4, 7.0, 6.2$  Hz, 1H), 3.81 (dt,  $J = 13.8, 7.1$  Hz, 1H), 3.32 (ddt,  $J = 13.3, 10.5, 5.4$  Hz, 1H), 3.21 (ddt,  $J = 13.0, 9.7, 6.3$  Hz, 1H), 1.80 – 1.62 (m, 7H), 1.56 (dtt,  $J = 13.0, 6.6, 2.8$  Hz, 1H), 1.43 (dddd,  $J = 13.5, 11.1, 5.5, 2.5$  Hz, 1H), 1.31 – 0.93 (m, 9H).

$^{13}\text{C}$  NMR (126 MHz, Chloroform-*d*)  $\delta$  157.20 (q,  $J = 36.6$  Hz), 120.83, 116.05 (q,  $J = 287.9$  Hz), 107.97, 49.99, 41.05, 39.13, 37.85, 32.55, 31.80, 31.69, 29.98, 28.19, 26.16, 26.16.

$^{19}\text{F}$  NMR (471 MHz, Chloroform-*d*)  $\delta$  -74.99.

IR (film)  $\nu_{\text{max}}$  3315, 3102, 2922, 2855, 1702, 1551, 1158, 1088, 721, 518

LRMS (EI)  $[\text{C}_{17}\text{H}_{25}\text{F}_3\text{N}_2\text{O}]$   $m/z$  calculated 330.19, found 330.2

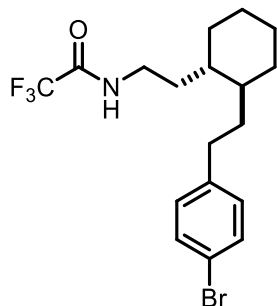

**3km** - N-(2-((1S,2S)-2-(4-bromophenethyl)cyclohexyl)ethyl)-2,2,2-trifluoroacetamide

Prepared using procedure B from compound **1k** and commercially available 1-bromo-4-(2-bromoethyl)benzene.

Yield 43% >20:1 dr

$^1\text{H}$  NMR (500 MHz, Chloroform-*d*)  $\delta$  7.50 – 7.39 (m, 2H), 7.11 – 7.02 (m, 2H), 6.21 (s, 1H), 3.43 (ddt,  $J = 15.3$ , 10.5, 5.3 Hz, 1H), 3.30 (ddt,  $J = 13.1$ , 9.6, 6.3 Hz, 1H), 2.66 (ddd,  $J = 13.8$ , 10.7, 5.2 Hz, 1H), 2.46 (ddd,  $J = 13.8$ , 10.6, 6.2 Hz, 1H), 1.94 – 1.66 (m, 5H), 1.47 – 1.34 (m, 2H), 1.30 – 1.20 (m, 2H), 1.19 – 1.00 (m, 4fH), 0.90 (h,  $J = 6.9$ , 5.4 Hz, 1H).

$^{13}\text{C}$  NMR (126 MHz, Chloroform-*d*)  $\delta$  157.08 (q,  $J = 36.5$  Hz), 141.75, 131.40, 130.09, 119.40, 115.84 (q,  $J = 288.0$  Hz), 40.77, 39.26, 37.84, 35.13, 32.58, 32.15, 31.49, 31.30, 25.85, 25.82.

$^{19}\text{F}$  NMR (376 MHz, Chloroform-*d*)  $\delta$  -75.95.

IR (film)  $\nu_{\text{max}}$  3303, 3104, 2923, 2855, 1701, 1553, 1487, 1160, 1180, 1072, 1011, 802, 722

LRMS (EI) [ $\text{C}_{18}\text{H}_{23}\text{BrF}_3\text{NO}$ ]  $m/z$  calculated 405.09/407.09, found 405.1/407.1

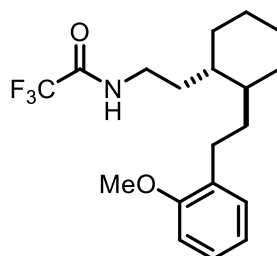

**3kn** - 2,2,2-trifluoro-N-(2-((2-methoxyphenethyl)cyclohexyl)ethyl)acetamide

Prepared using procedure B from compound **1k** and commercially available 1-(2-bromoethyl)-2-methoxybenzene.

Yield 58% >20:1 dr

$^1\text{H}$  NMR (400 MHz, Chloroform-*d*)  $\delta$  7.23 – 7.05 (m, 2H), 6.93 – 6.82 (m, 2H), 6.19 (s, 1H), 3.81 (s, 3H), 3.43 – 3.25 (m, 2H), 2.67 (td,  $J = 12.2$ , 11.1, 5.1 Hz, 1H), 2.52 – 2.42 (m, 1H), 1.93 – 1.64 (m, 5H), 1.50 – 1.33 (m, 2H), 1.27 – 0.88 (m, 7H).

$^{13}\text{C}$  NMR (101 MHz, Chloroform-*d*)  $\delta$  157.55, 131.49, 129.85, 127.12, 120.64, 116.06 (q,  $J = 287.9$  Hz), 110.47, 55.41, 41.39, 39.17, 38.00, 33.73, 32.61, 31.83, 31.70, 27.10, 26.20, 26.19.

$^{19}\text{F}$  NMR (471 MHz, Chloroform-*d*)  $\delta$  -75.06.

IR (film)  $\nu_{\text{max}}$  3307, 3104, 2922, 2854, 1702, 1553, 1493, 1461, 1205, 1158, 1031, 750, 724

LRMS (EI) [ $\text{C}_{19}\text{H}_{26}\text{F}_3\text{NO}_2$ ]  $m/z$  calculated 357.19, found 357.2

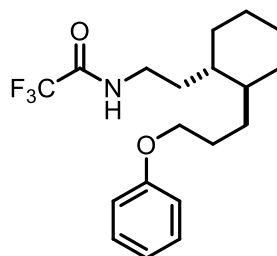

**3ko** - 2,2,2-trifluoro-N-(2-(2-(3-phenoxypropyl)cyclohexyl)ethyl)acetamide

Prepared using procedure B from compound **1k** and commercially available (3-bromopropoxy)benzene.

Yield 54% >20:1 dr

$^1\text{H}$  NMR (500 MHz, Chloroform-*d*)  $\delta$  7.28 (dd,  $J = 8.7, 7.4$  Hz, 2H), 6.95 – 6.91 (m, 1H), 6.89 (dd,  $J = 8.8, 1.1$  Hz, 2H), 6.21 (s, 1H), 4.02 – 3.88 (m, 2H), 3.42 (ddt,  $J = 13.4, 10.2, 5.4$  Hz, 1H), 3.30 (ddt,  $J = 13.1, 9.6, 6.4$  Hz, 1H), 1.75-1.91 (m, 4H), 1.62-1.74 (m, 4H), 1.46 – 1.18 (m, 4H), 1.18 – 0.91 (m, 4H).

$^{13}\text{C}$  NMR (126 MHz, Chloroform-*d*)  $\delta$  159.14, 157.25 (q,  $J = 36.8$  Hz), 129.62, 120.75, 117.18 (q,  $J = 287.9$  Hz), 114.67, 68.19, 41.12, 39.42, 38.05, 32.71, 31.79, 31.64, 29.60, 26.14, 26.13, 26.08.

$^{19}\text{F}$  NMR (471 MHz, Chloroform-*d*)  $\delta$  -75.02.

IR (film)  $\nu_{\text{max}}$  3306, 3100, 3040, 2920, 2853, 1701, 1600, 1552, 1496, 1205, 1158, 1035, 753, 691, 512

LRMS (EI)  $[\text{C}_{19}\text{H}_{26}\text{F}_3\text{NO}_2]$   $m/z$  calculated 357.19, found 357.2

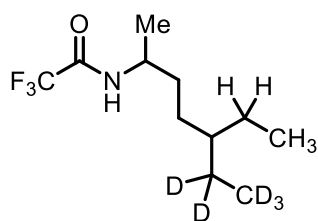

**3ap** - N-(5-ethylheptan-2-yl-6,6,7,7,7-d<sub>5</sub>)-2,2,2-trifluoroacetamide

Prepared using procedure B from compound **2c** and commercially available bromoethane-*d*<sub>5</sub>.

Yield 42% 1:1 dr

$^1\text{H}$  NMR (400 MHz, Chloroform-*d*)  $\delta$  6.01 (s, 1H), 4.10 (hept,  $J = 6.6$  Hz, 1H), 1.51 – 1.16 (m, 11H), 0.89 (t,  $J = 6.9$  Hz, 3H).

$^{13}\text{C}$  NMR (101 MHz, Chloroform-*d*)  $\delta$  156.62 (q,  $J = 36.7$  Hz), 116.09 (q,  $J = 288.1$  Hz), 44.87, 40.85, 35.44, 29.89, 21.11, 20.54, 19.74, 14.53, 11.23 – 10.87 (m).

$^{19}\text{F}$  NMR (376 MHz, Chloroform-*d*)  $\delta$  -76.08.

$^2\text{H}$  NMR (61 MHz, Chloroform-*d*)  $\delta$  1.29 (s, 2H), 0.80 (s, 3H).

IR (film)  $\nu_{\text{max}}$  3295, 3100, 2959, 2921, 2852, 2220, 2097, 2073, 1698, 1556, 1185, 1162, 725

LRMS (EI)  $[\text{C}_{11}\text{H}_{15}\text{D}_5\text{F}_3\text{NO}]$   $m/z$  calculated 244.18, found 244.3

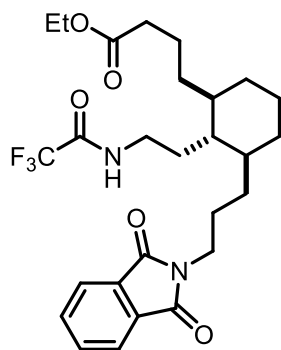

**4a** - ethyl 4-(3-(3-(1,3-dioxisoindolin-2-yl)propyl)-2-(2-(2,2,2-trifluoroacetamido)ethyl)cyclohexyl)butanoate

Prepared using procedure B from compound **3kk** and commercially available ethyl 4-bromobutanoate.

Yield 45% >20:1:1:1 dr

$^1\text{H}$  NMR (400 MHz, Chloroform-*d*)  $\delta$  7.85 (dd,  $J = 5.4, 3.0$  Hz, 2H), 7.80 – 7.68 (m, 2H), 6.73 (s, 1H), 4.14 (q,  $J = 7.1$  Hz, 2H), 3.79 – 3.64 (m, 2H), 3.31 (dtd,  $J = 23.6, 13.0, 6.4$  Hz, 1H), 2.41 – 2.23 (m, 2H), 1.89 – 1.46 (m, 12H), 1.27 (t,  $J = 7.1$  Hz, 4H), 1.24 – 1.11 (m, 3H), 1.02 – 0.83 (m, 3H).

$^{13}\text{C}$  NMR (101 MHz, Chloroform-*d*)  $\delta$  173.85, 168.66, 157.07 (q,  $J = 36.8$  Hz), 133.97, 132.09, 123.19, 115.93 (q,  $J = 288.0$  Hz), 60.27, 43.74, 39.88, 39.67, 38.18, 37.18, 34.43, 32.85, 31.90, 31.81, 30.69, 28.29, 25.69, 25.38, 21.57, 14.23.

$^{19}\text{F}$  NMR (376 MHz, Chloroform-*d*)  $\delta$  -75.90.

IR (film)  $\nu_{\text{max}}$  3339, 3090, 2927, 2858, 1771, 1705, 1553, 1397, 1370, 1177, 1155, 720

LRMS (ESI+APCI) [ $\text{C}_{27}\text{H}_{35}\text{F}_3\text{N}_2\text{O}_5$ ]  $m/z$  ( $[\text{M}+\text{H}]^+$ ) calculated 525.25, found 525.2

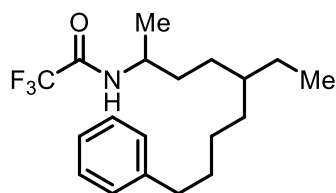

**3aj** - N-(5-ethyl-9-phenylnonan-2-yl)-2,2,2-trifluoroacetamide

Prepared using procedure B from compound **1c** and commercially available (4-bromobutyl)benzene.

Yield 68% 1:1 dr, contains 5% impurity unsaturated product

10:1 mixture of diastereomers isolated

$^1\text{H}$  NMR (400 MHz, Chloroform-*d*)  $\delta$  7.37 – 7.22 (m, 3H), 7.18 (d,  $J = 7.8$  Hz, 4H), 5.96 (s, 1H), 4.10 (p,  $J = 7.0$  Hz, 1H), 2.74 – 2.52 (m, 2H), 1.69 – 1.53 (m, 2H), 1.52 – 1.10 (m, 14H), 0.96 – 0.80 (m, 3H).

$^{13}\text{C}$  NMR (101 MHz, Chloroform-*d*)  $\delta$  156.40 (q,  $J = 36.5$  Hz), 142.67, 128.39, 128.25, 125.62, 115.90 (q,  $J = 288.1$  Hz), 44.69, 41.14, 35.86, 35.73, 34.17, 33.30, 31.68, 25.93, 20.86, 19.49, 14.35.

$^{19}\text{F}$  NMR (376 MHz, Chloroform-*d*)  $\delta$  -76.04.

IR (film)  $\nu_{\text{max}}$  3294, 3088, 3027, 2929, 2858, 1696, 1556, 1455, 1158, 1182, 744, 725, 697

LRMS (EI) [ $\text{C}_{19}\text{H}_{28}\text{F}_3\text{NO}$ ]  $m/z$  calculated 343.21, found 434.2

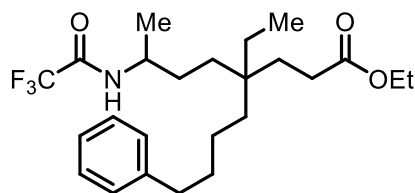

**4b** - ethyl 4-ethyl-8-phenyl-4-(3-(2,2,2-trifluoroacetamido)butyl)octanoate

Synthesized according to conditions reported by Chu *et al.*,<sup>3</sup> compound **3cj** was reacted with commercially available ethyl acrylate.

Yield 61% 1:1 dr

$^1\text{H}$  NMR (500 MHz, Chloroform-*d*)  $\delta$  7.19 (s, 1H), 4.33 (m, 1H), 4.26 – 3.97 (m, 4H), 2.67 – 2.52 (m, 2H), 2.28 (tt,  $J = 7.4, 2.3$  Hz, 4H), 1.68 – 1.50 (m, 4H), 1.48 – 1.39 (m, 1H), 1.39 – 1.30 (m, 2H), 1.30 – 1.21 (m, 8H), 0.88 – 0.77 (m, 3H).

$^{13}\text{C}$  NMR (126 MHz, Chloroform-*d*)  $\delta$  173.81, 171.72, 156.74 (q,  $J = 36.8$  Hz), 116.03 (q,  $J = 288.0$  Hz), 61.27, 60.44, 45.02, 37.93, 37.48, 35.69, 34.57, 32.59, 32.14, 25.71, 21.78, 14.27, 10.57.

$^{19}\text{F}$  NMR (471 MHz, Chloroform-*d*)  $\delta$  -75.17, -75.22.

IR (film)  $\nu_{\text{max}}$  3311, 3089, 2930, 2862, 1701, 1552, 1155, 1177, 724, 699

LRMS (EI) [ $\text{C}_{24}\text{H}_{36}\text{F}_3\text{NO}_3$ ]  $m/z$  calculated 443.26, found 443.3

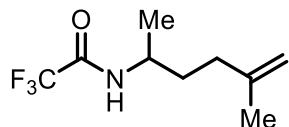

**5a** - 2,2,2-trifluoro-N-(5-methylhex-5-en-2-yl)acetamide

Prepared using procedure B from compound **1p** utilizing ethyl 4-bromobutanoate as an oxidant.

Yield 40%

$^1\text{H NMR}$  (400 MHz, Chloroform-*d*)  $\delta$  6.05 (s, 1H), 4.76 (s, 1H), 4.70 (s, 1H), 4.11 – 3.98 (m, 1H), 2.15 – 2.00 (m,  $J$  = 7.6 Hz, 2H), 1.80 – 1.60 (m, 5H), 1.25 (d,  $J$  = 6.7 Hz, 3H).

$^{13}\text{C NMR}$  (101 MHz, Chloroform-*d*)  $\delta$  156.66 (q,  $J$  = 37.0 Hz), 144.66, 116.06 (q,  $J$  = 288.1 Hz), 111.04, 46.53, 34.18, 34.05, 22.51, 20.45.

$^{19}\text{F NMR}$  (376 MHz, Chloroform-*d*)  $\delta$  -76.05.

LRMS (EI) [ $\text{C}_9\text{H}_{14}\text{F}_3\text{NO}$ ]  $m/z$  calculated 209.10, found 209.1

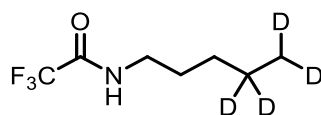

**1c-d4** - 2,2,2-trifluoro-N-(pentyl-4,4,5,5-d4)acetamide

Prepared from the commercially available 2-(pent-4-yn-1-yl)isoindoline-1,3-dione, (5.00 g, 23.4 mmol) which was subjected to ten percent Pd/C (2.5 grams, 2.34 mmol) in MeOH (0.05M) under an atmosphere of  $\text{D}_2$  overnight at room temperature to form the corresponding alkane. The product was dried under vacuum and used for the subsequent step without further purification. The phthalimide alkane was then subjected to 3.5 equivalents (1.18 g, 23.4 mmol) hydrazine monohydrate in 150 mL EtOH at room temperature. The mixture was then refluxed overnight. Three equivalents (8.00 g, 70.2 mmol) of trifluoroacetic acid was then added. EtOH was then removed *en vacuo* and to the resulting white solid was added 50 mL 1 M NaOH in  $\text{H}_2\text{O}$  slowly. The mixture was then extracted with DCM three times, washed with brine and dried over  $\text{Na}_2\text{SO}_4$ . The solvent was removed by careful evaporation and the product was subjected to procedure A without further purification to form **1q**.

Yield 15% (3 steps)

$^1\text{H NMR}$  (400 MHz, Chloroform-*d*)  $\delta$  6.20 (s, 1H), 3.36 (q,  $J$  = 6.8 Hz, 2H), 1.59 (tt,  $J$  = 8.4, 6.6 Hz, 2H), 1.32 (q,  $J$  = 9.4, 8.0 Hz, 2H), 0.88 (t,  $J$  = 7.4 Hz, 1H).

$^2\text{H NMR}$  (61 MHz, Chloroform-*d*)  $\delta$  1.30 (s, 2H), 0.88 (s, 2H).

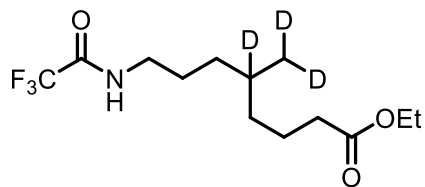

**3ca-d3** - ethyl 5-(methyl-d)-8-(2,2,2-trifluoroacetamido)octanoate-4,5,6,7-d4

Prepared using procedure B from compound **1q**.

$^1\text{H NMR}$  (400 MHz, Chloroform-*d*)  $\delta$  6.39 (s, 1H), 4.13 (q,  $J$  = 7.1 Hz, 2H), 3.37 (td,  $J$  = 8.2, 2.8 Hz, 2H), 2.29 (t,  $J$  = 7.3 Hz, 2H), 1.68 – 1.48 (m, 6H), 1.37 – 1.18 (m, 7H), 0.93 – 0.75 (m, 1H).

$^2\text{H NMR}$  (61 MHz, Chloroform-*d*)  $\delta$  1.33 (s, 1H), 0.84 (s, 2H).



## References:

- (1) Milan, M.; Carboni, G.; Salamone, M.; Costas, M.; Bietti, M. Tuning Selectivity in Aliphatic C–H Bond Oxidation of N-Alkylamides and Phthalimides Catalyzed by Manganese Complexes. *ACS Catal.* **2017**, *7*, 5903–5911.
- (2) Xu, B.; Tambar, U. K. Remote Allylation of Unactivated C(Sp<sup>3</sup>)–H Bonds Triggered by Photogenerated Amidyl Radicals. *ACS Catal.* **2019**, *9*, 4627–4631.
- (3) Chu, J. C. K.; Rovis, T. Amide-Directed Photoredox-Catalysed C–C Bond Formation at Unactivated Sp<sup>3</sup> C–H Bonds. *Nature* **2016**, *539*, 272–275.

# NMR Spectra:

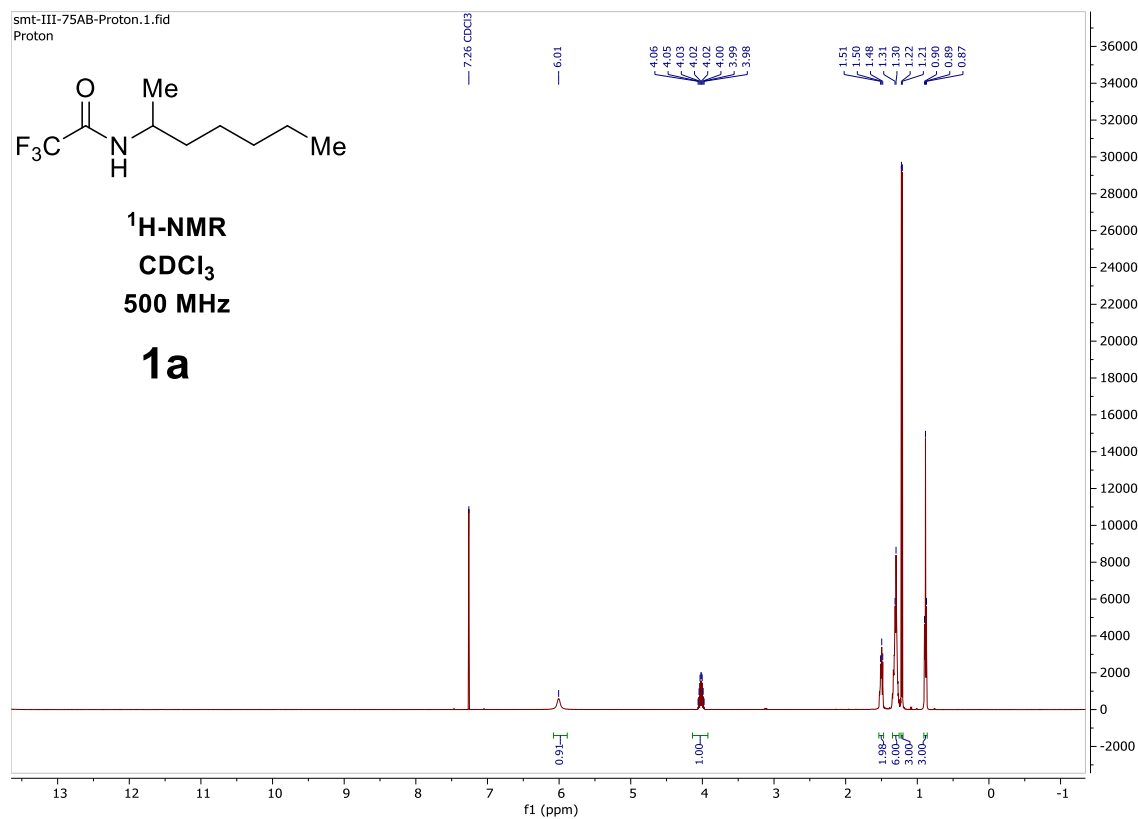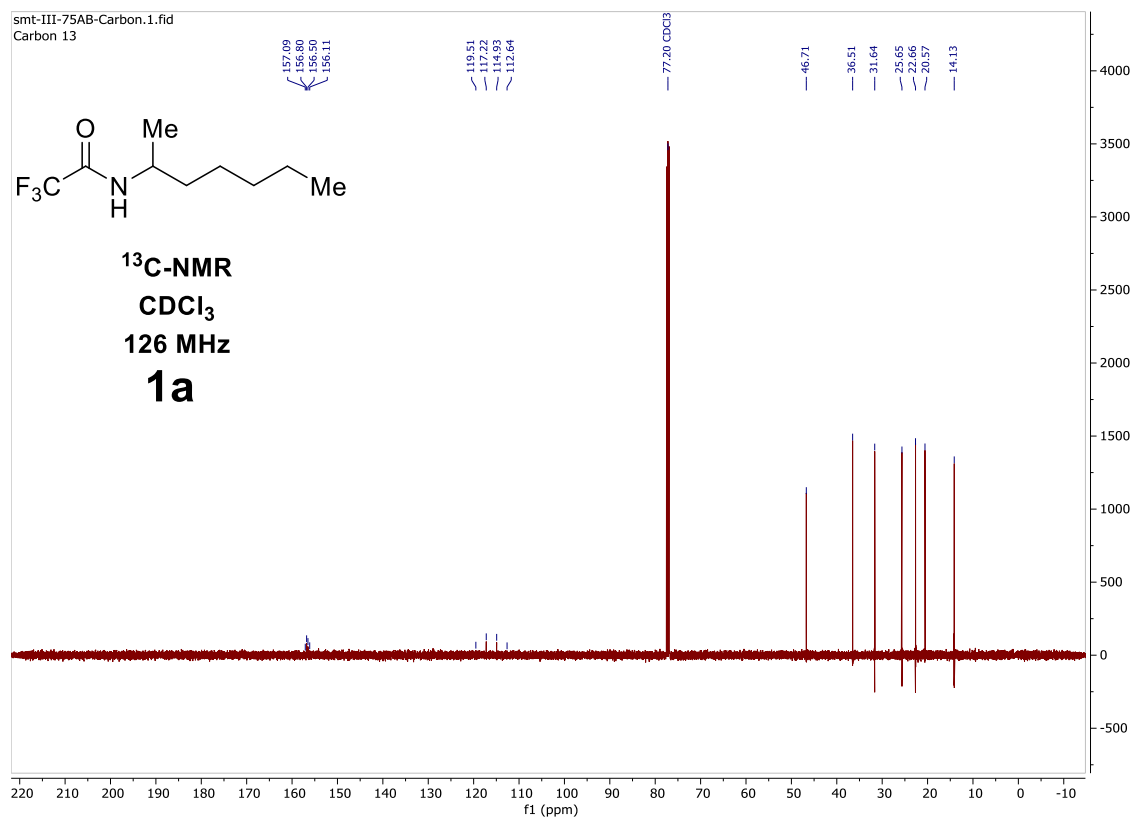

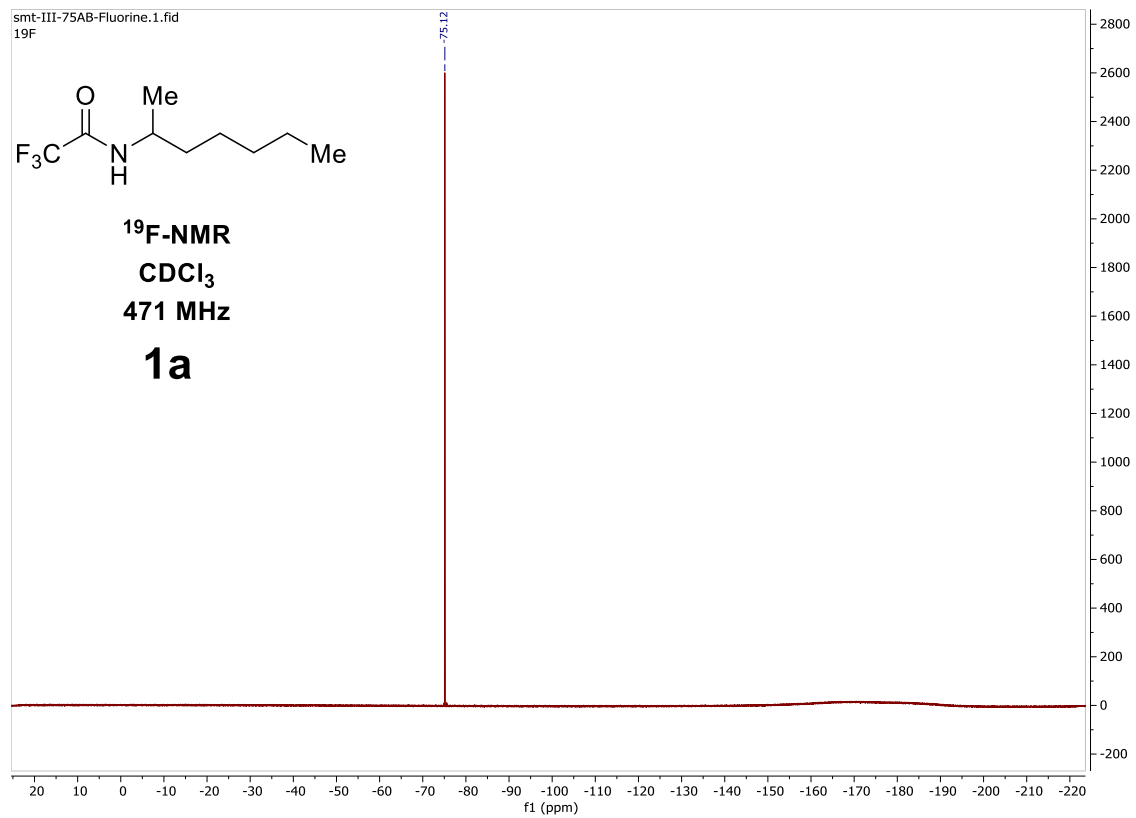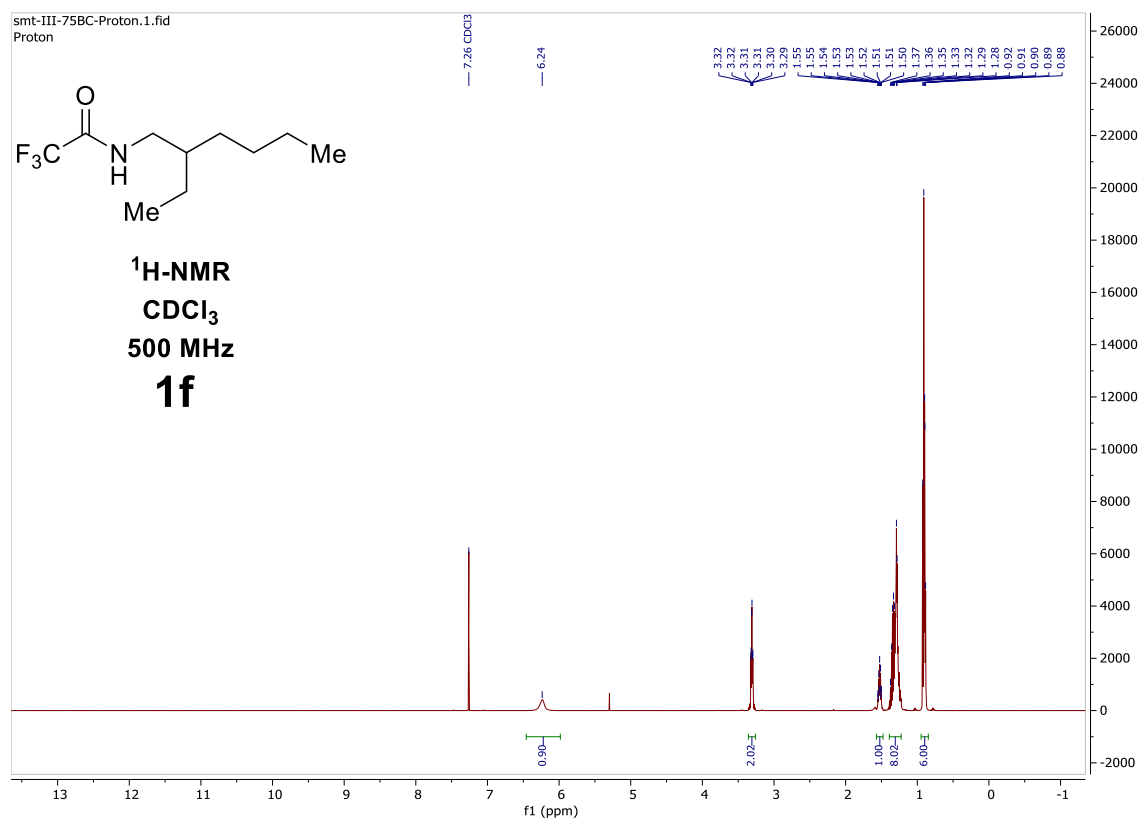

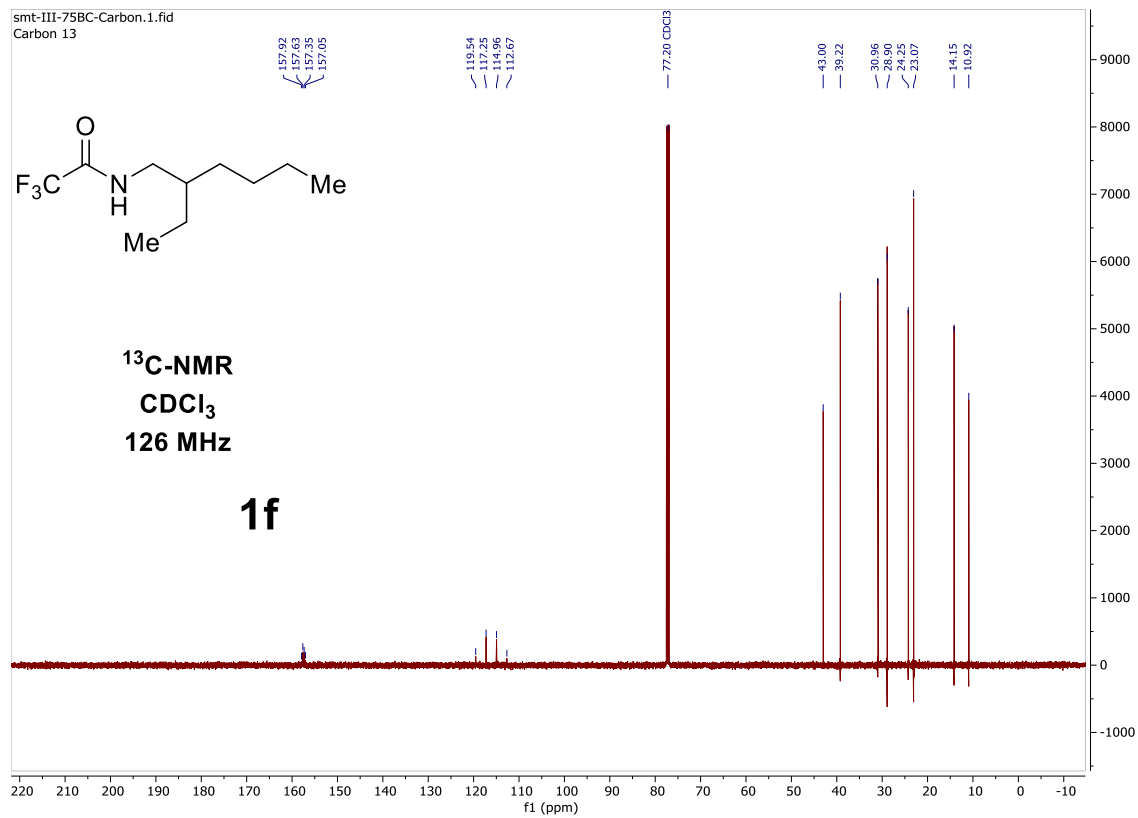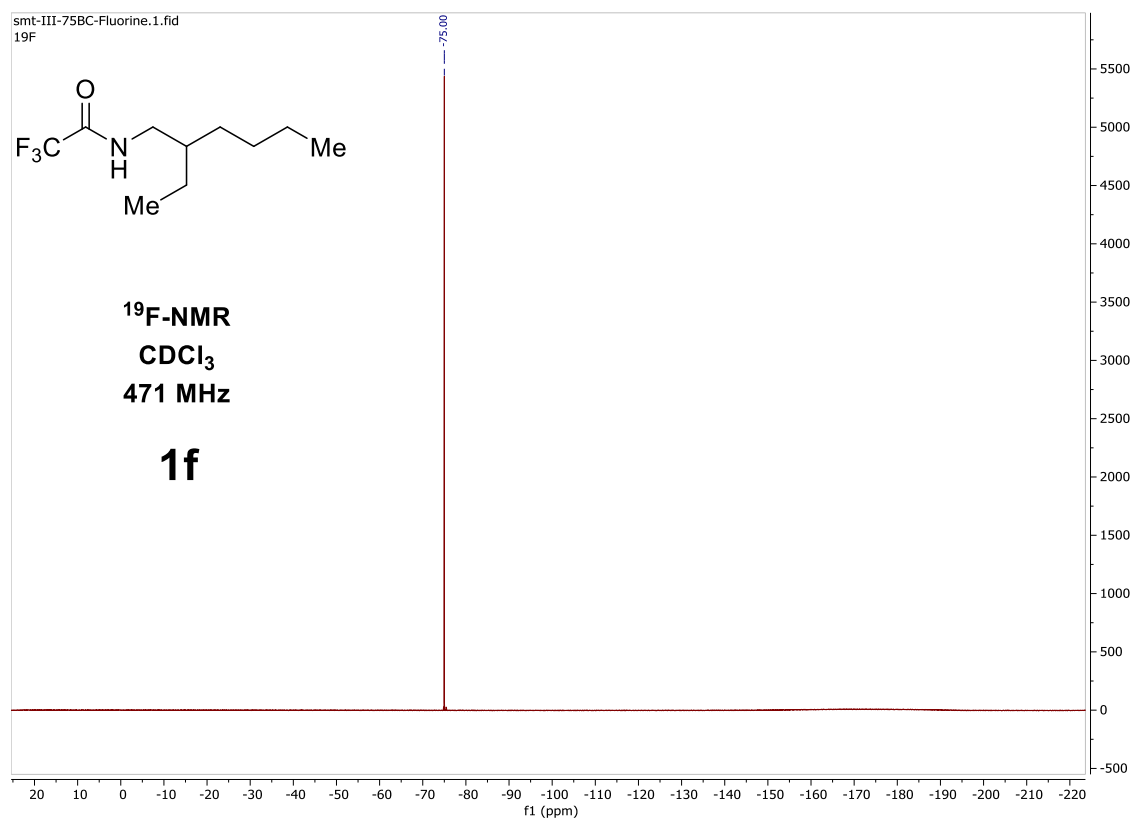

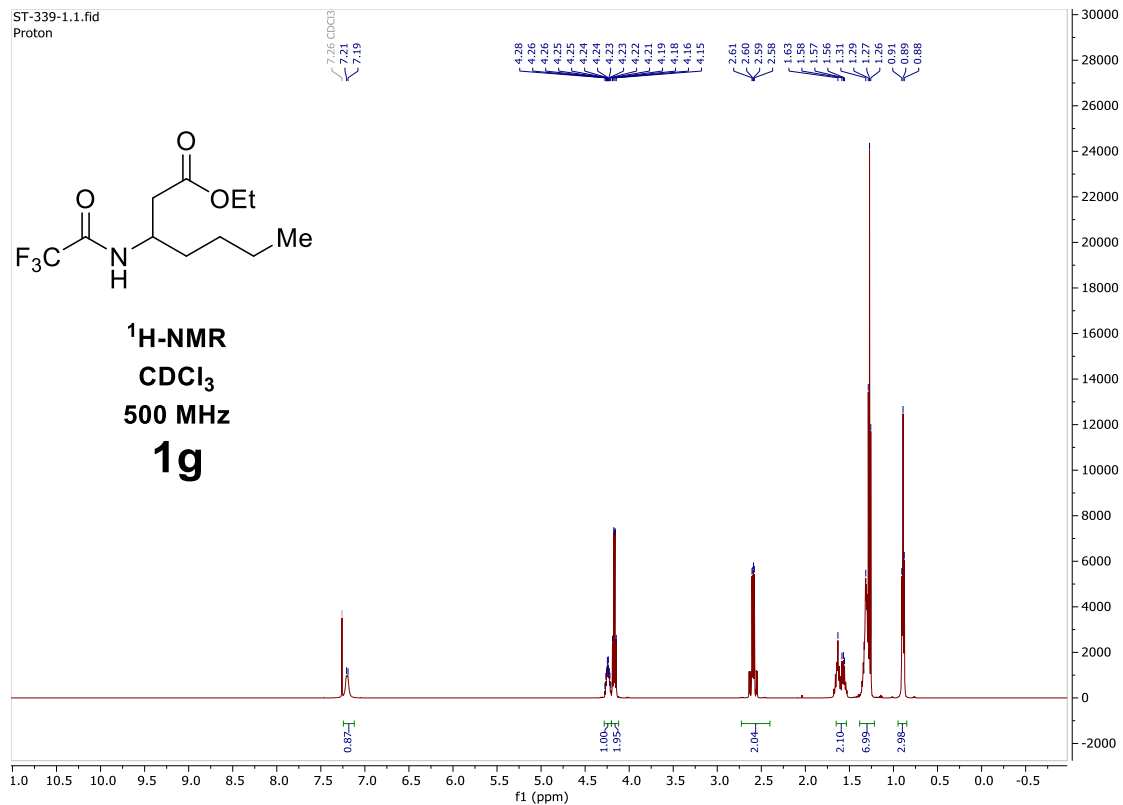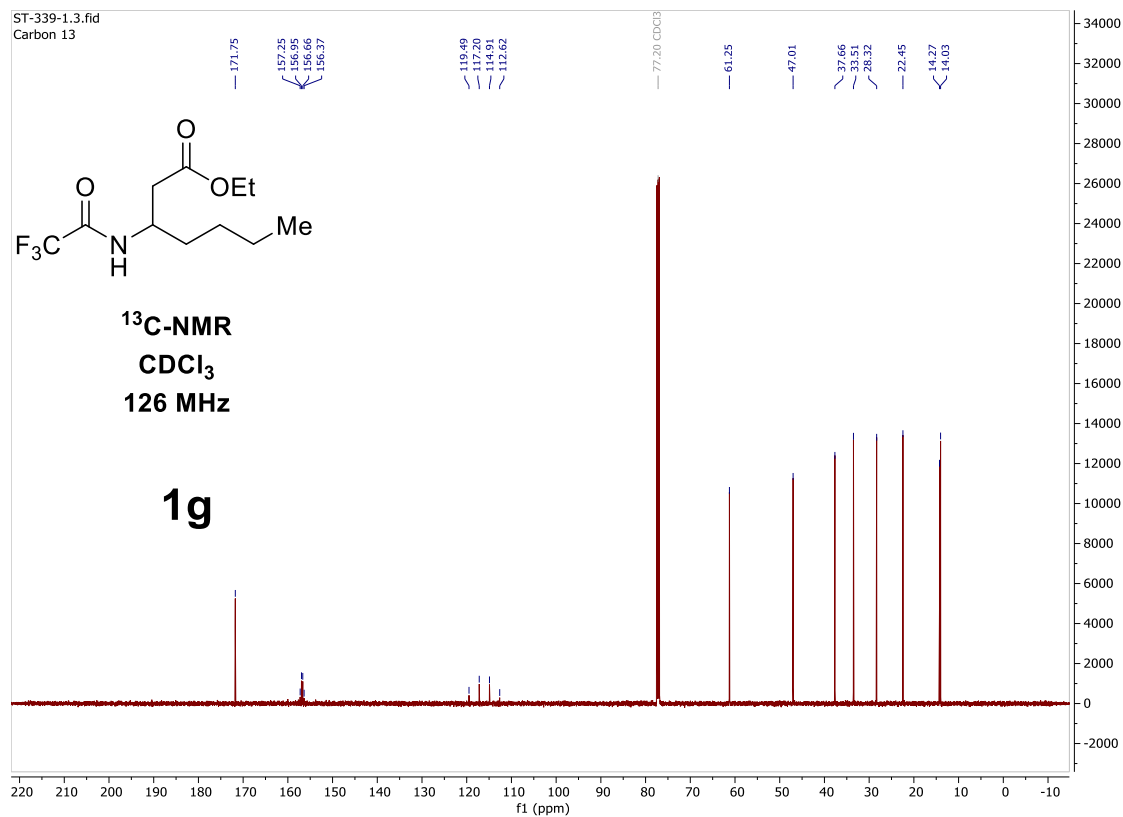

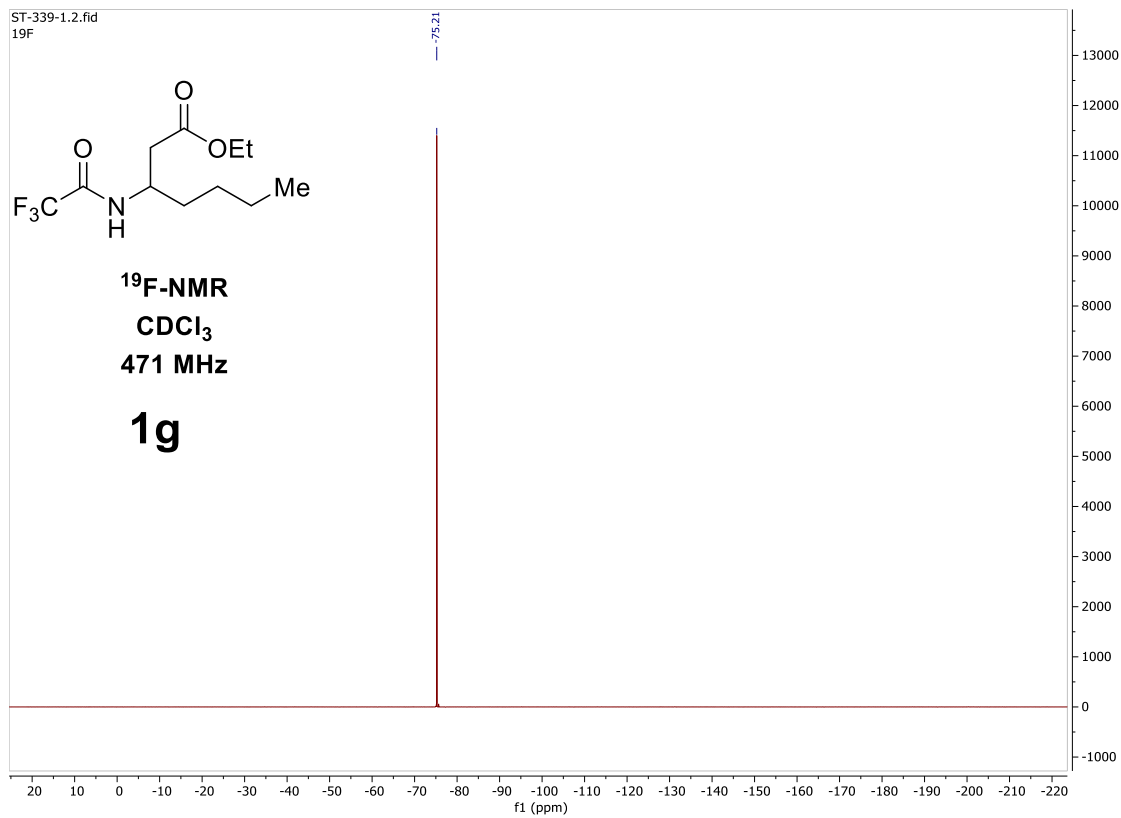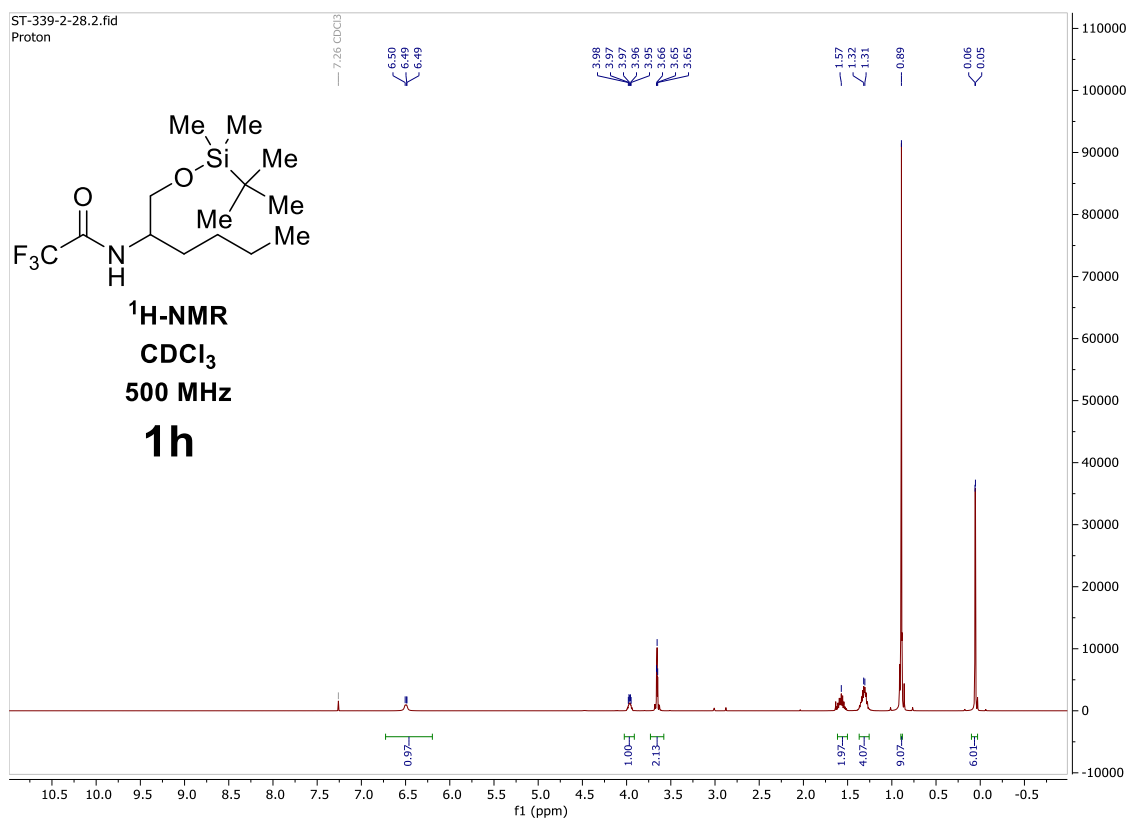

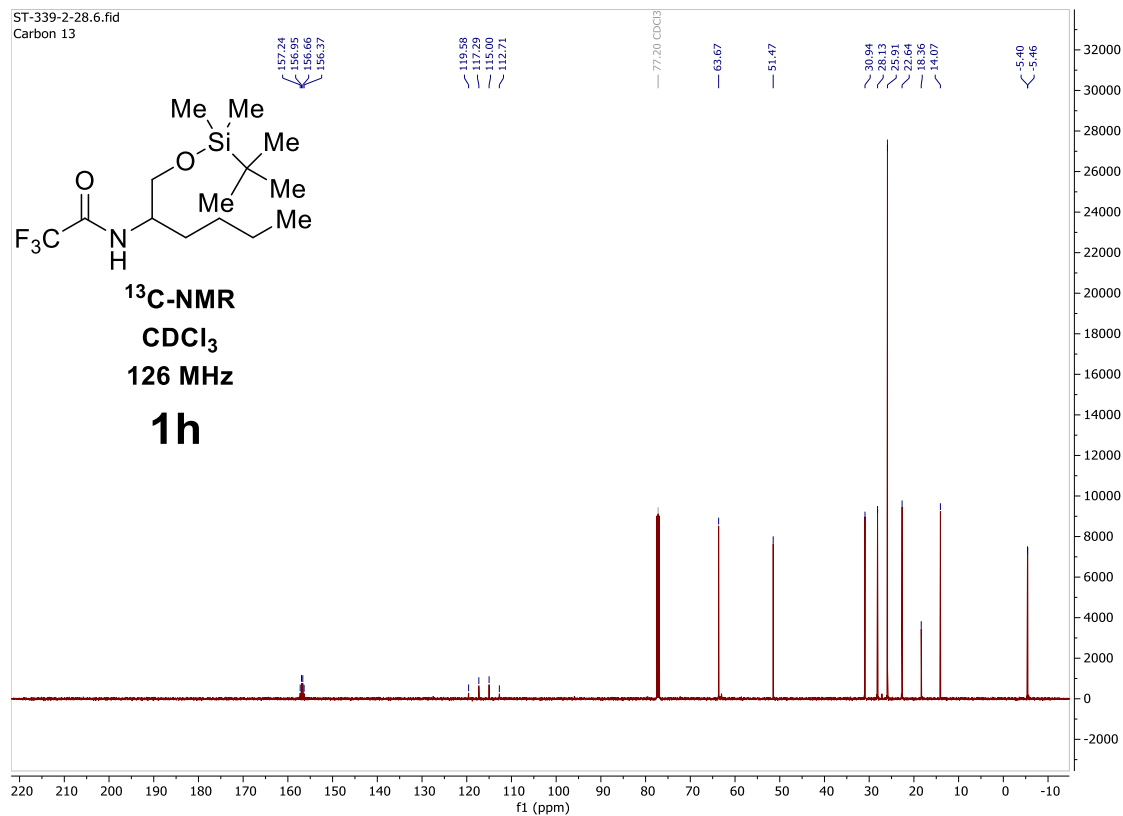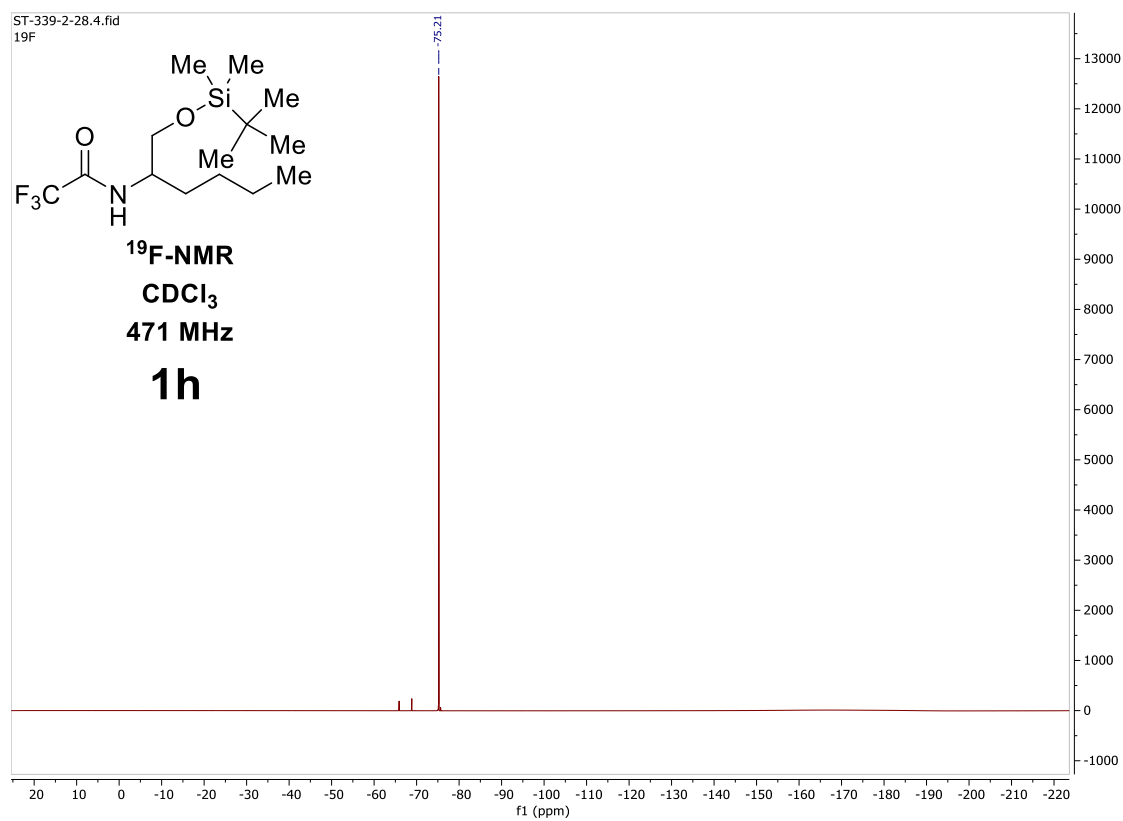

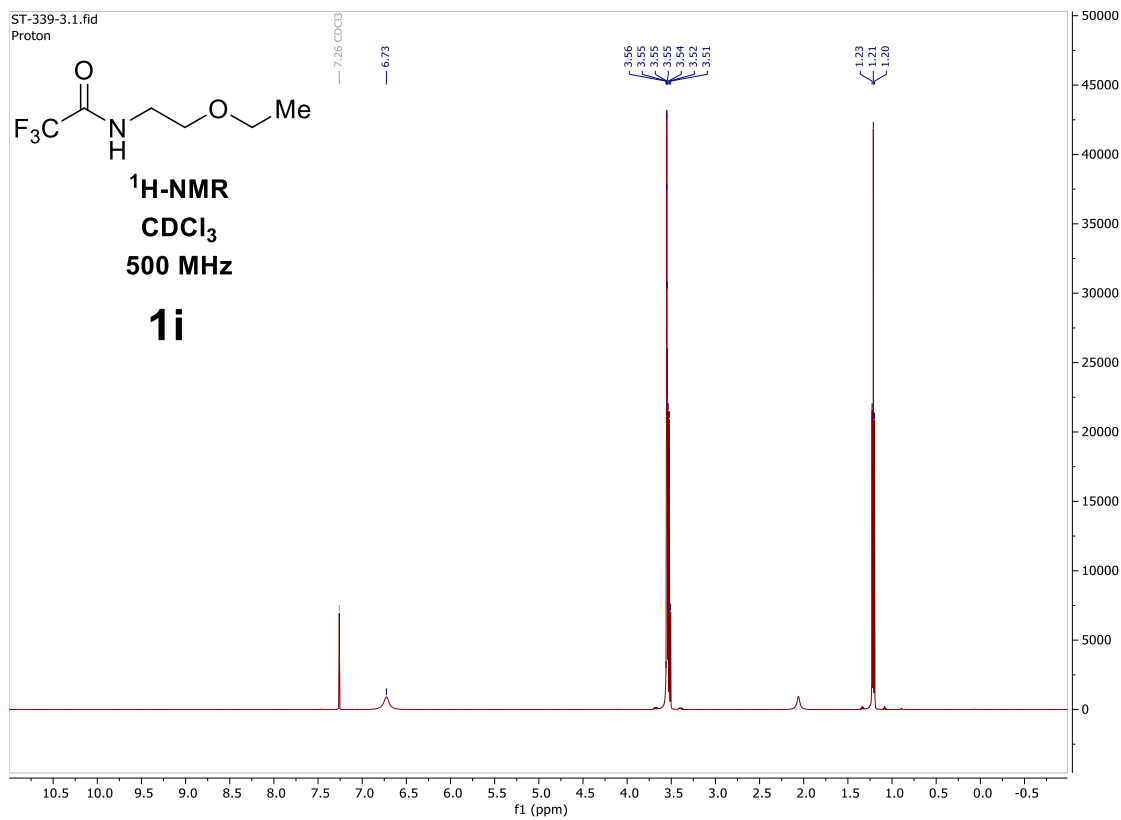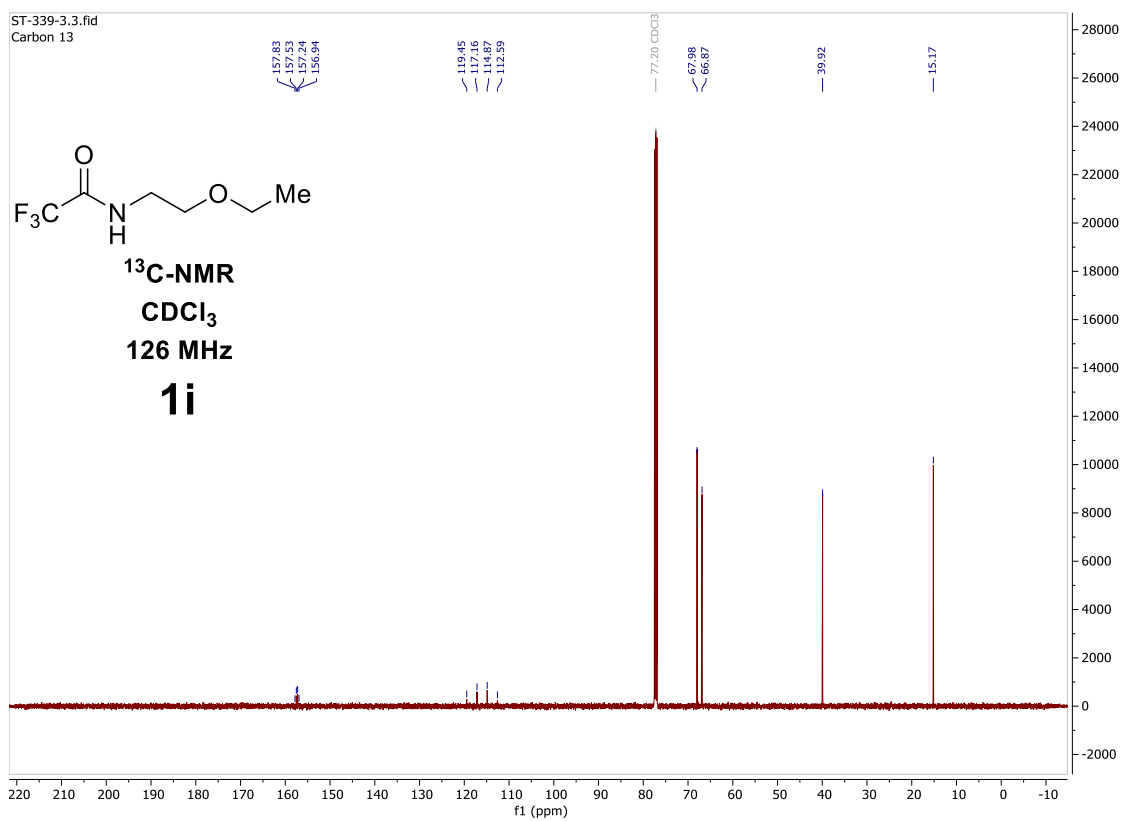



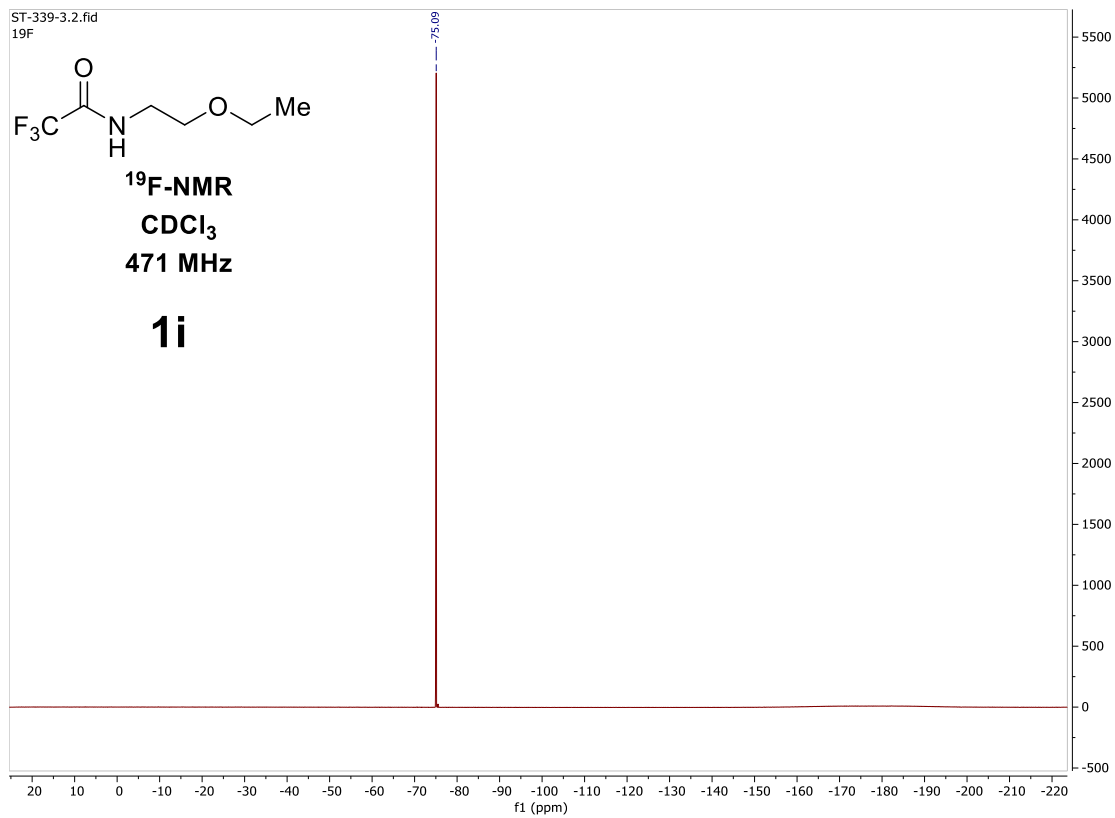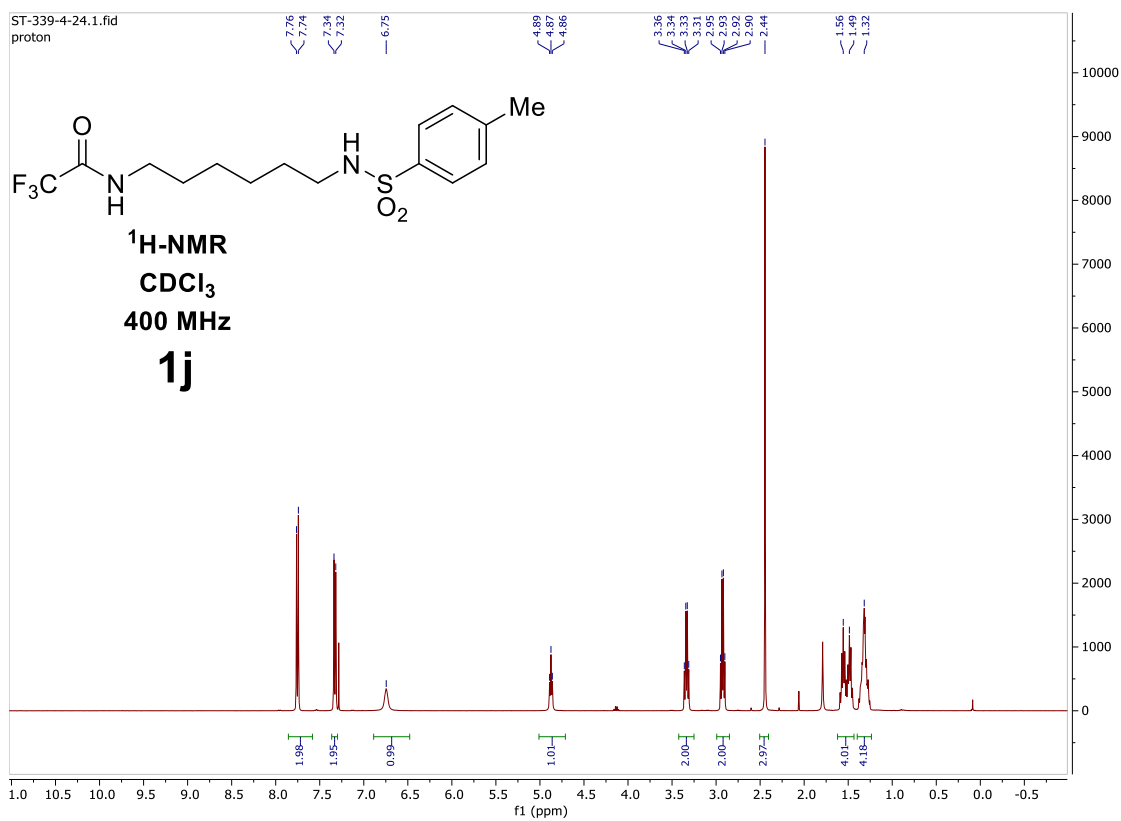

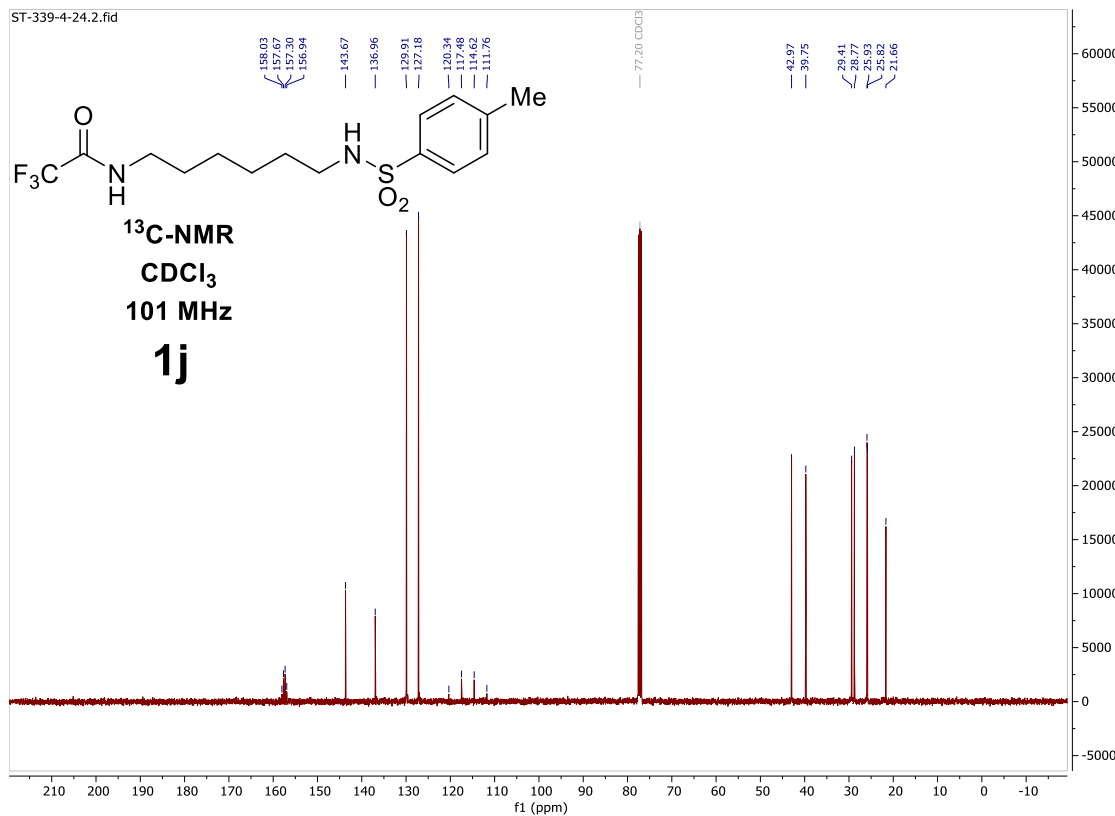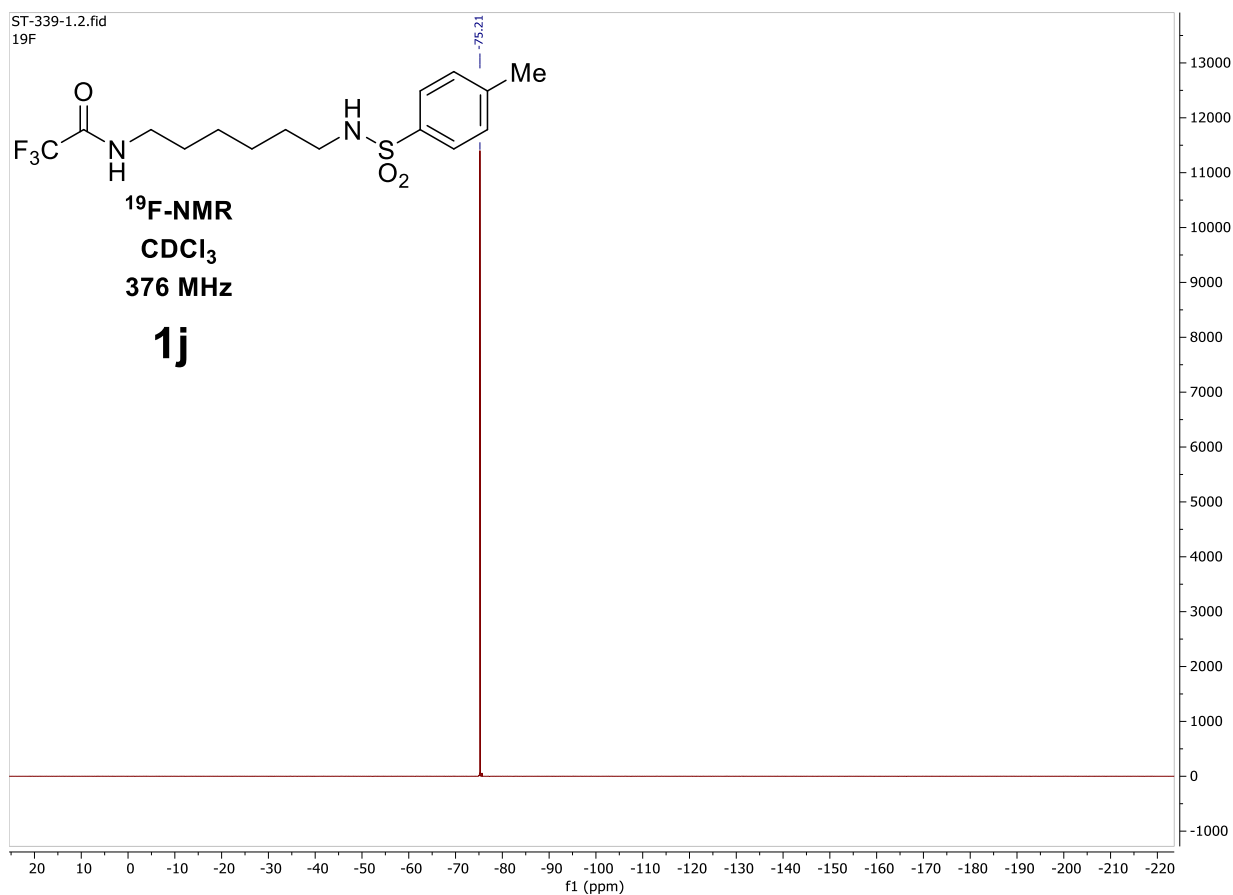

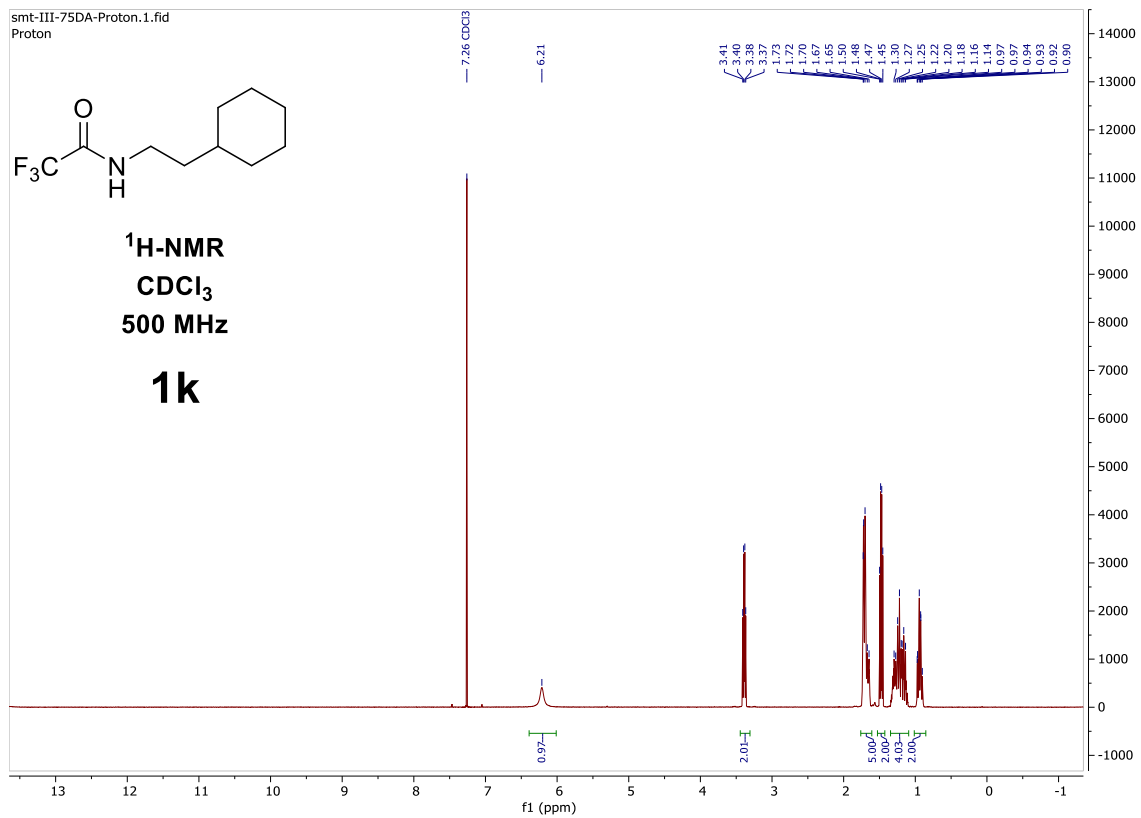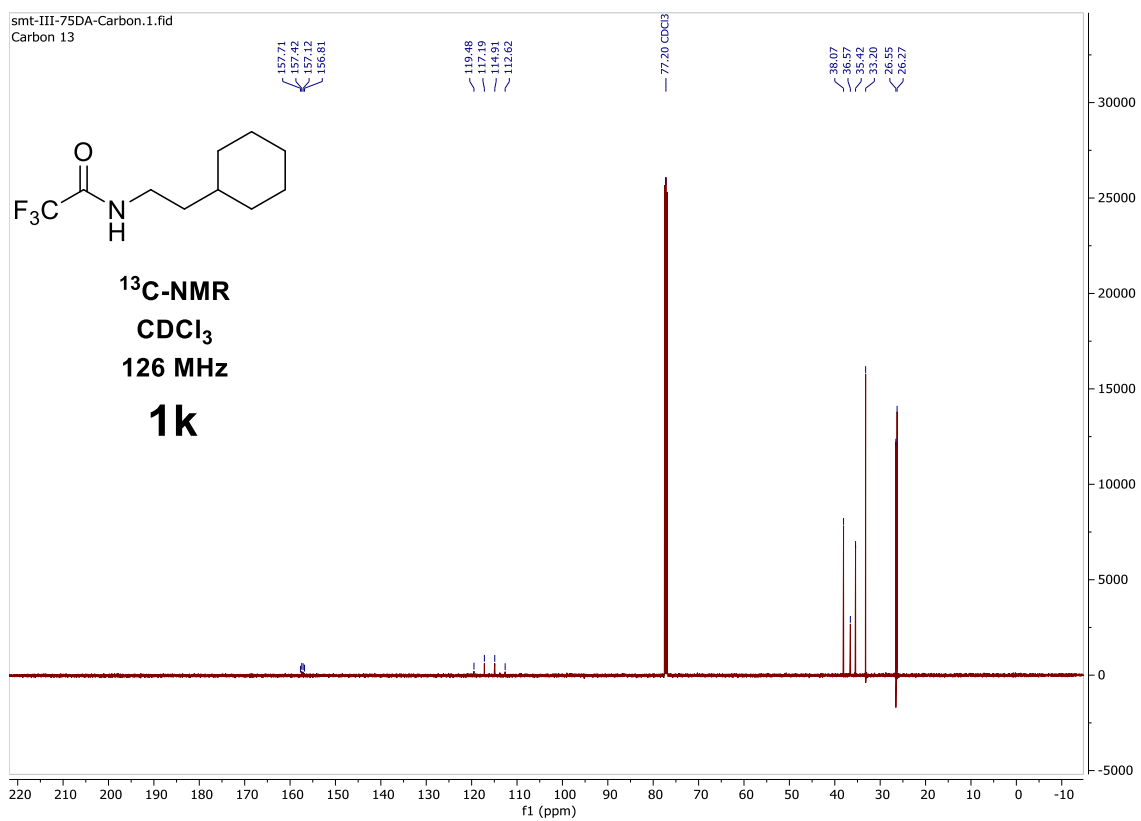

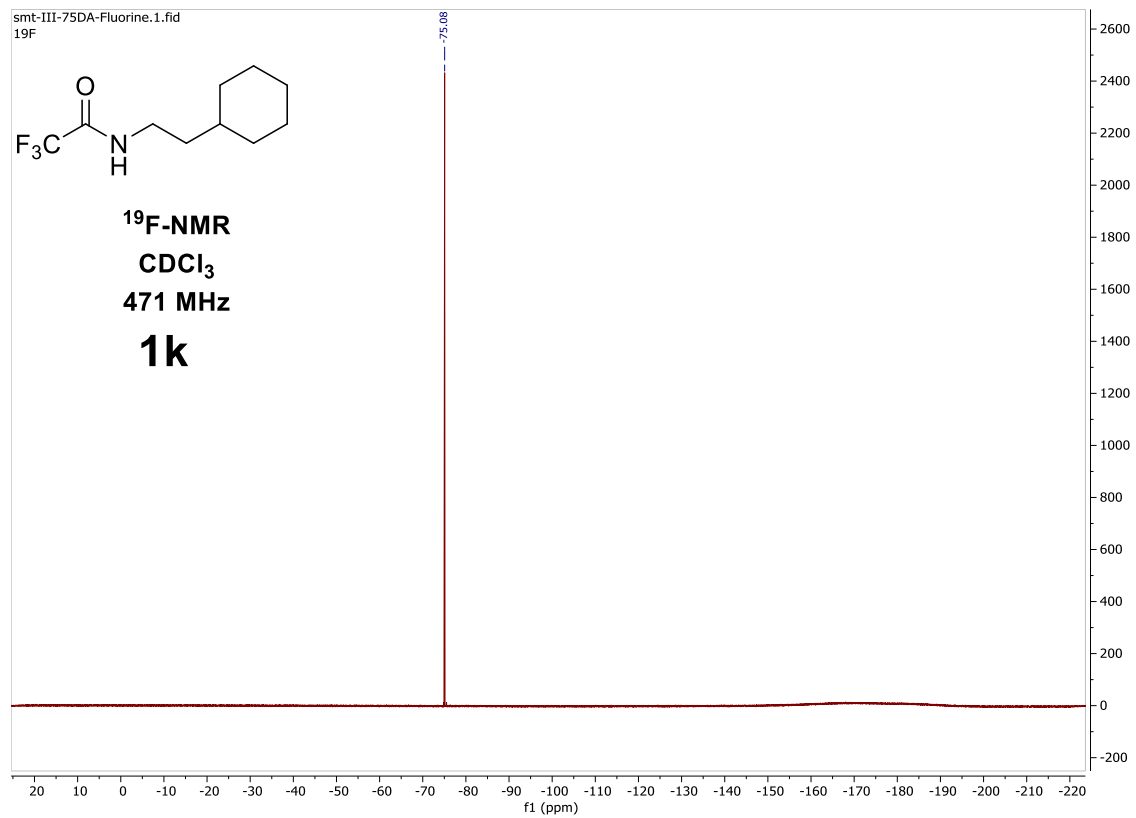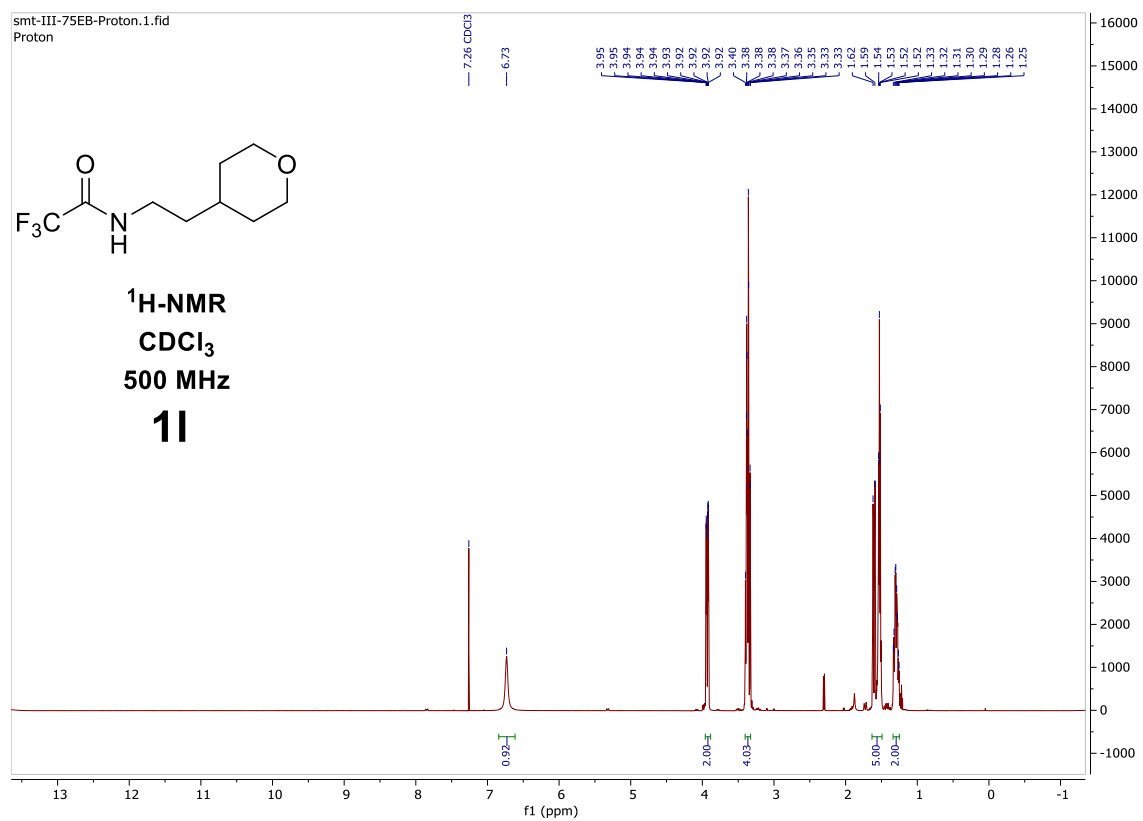

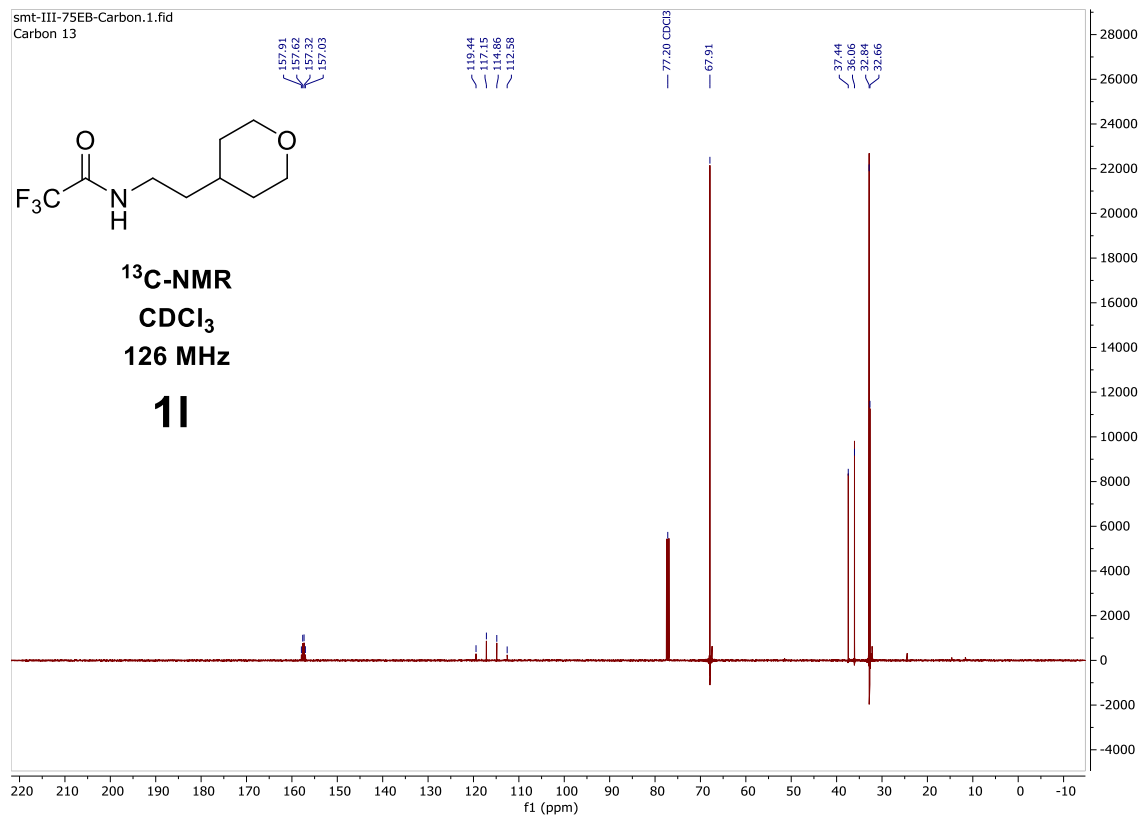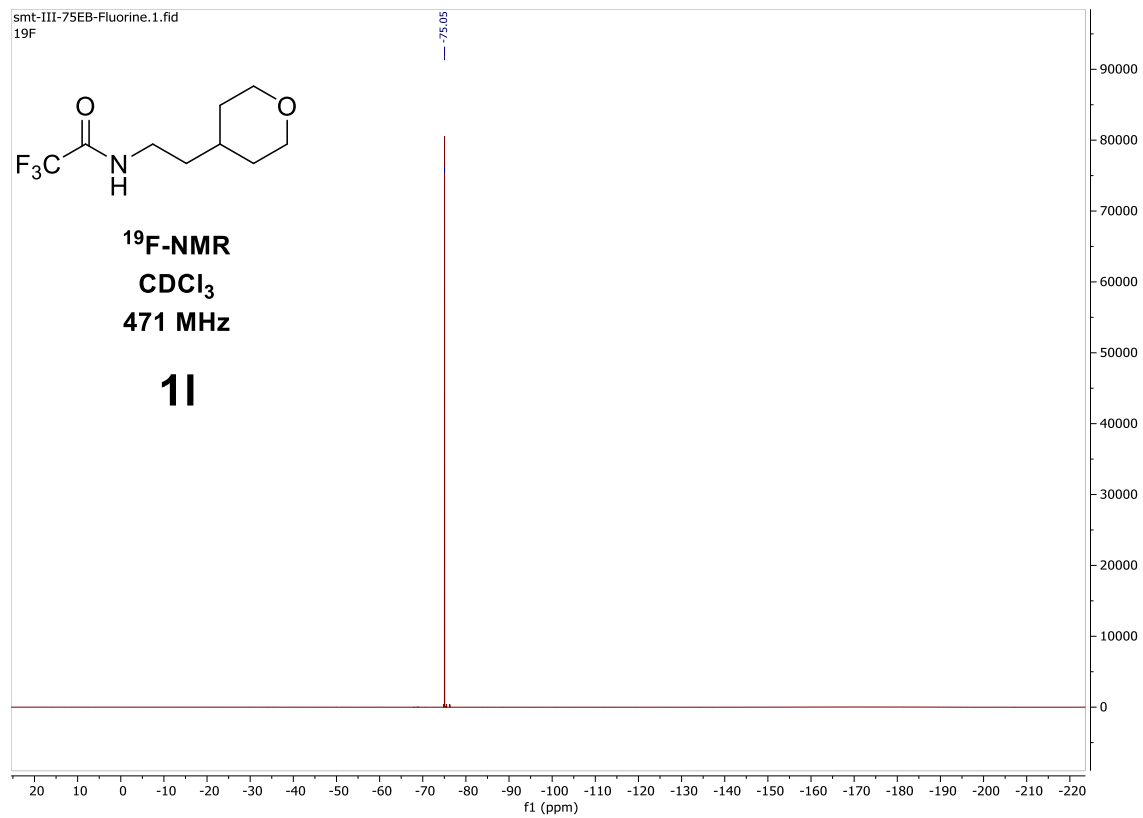

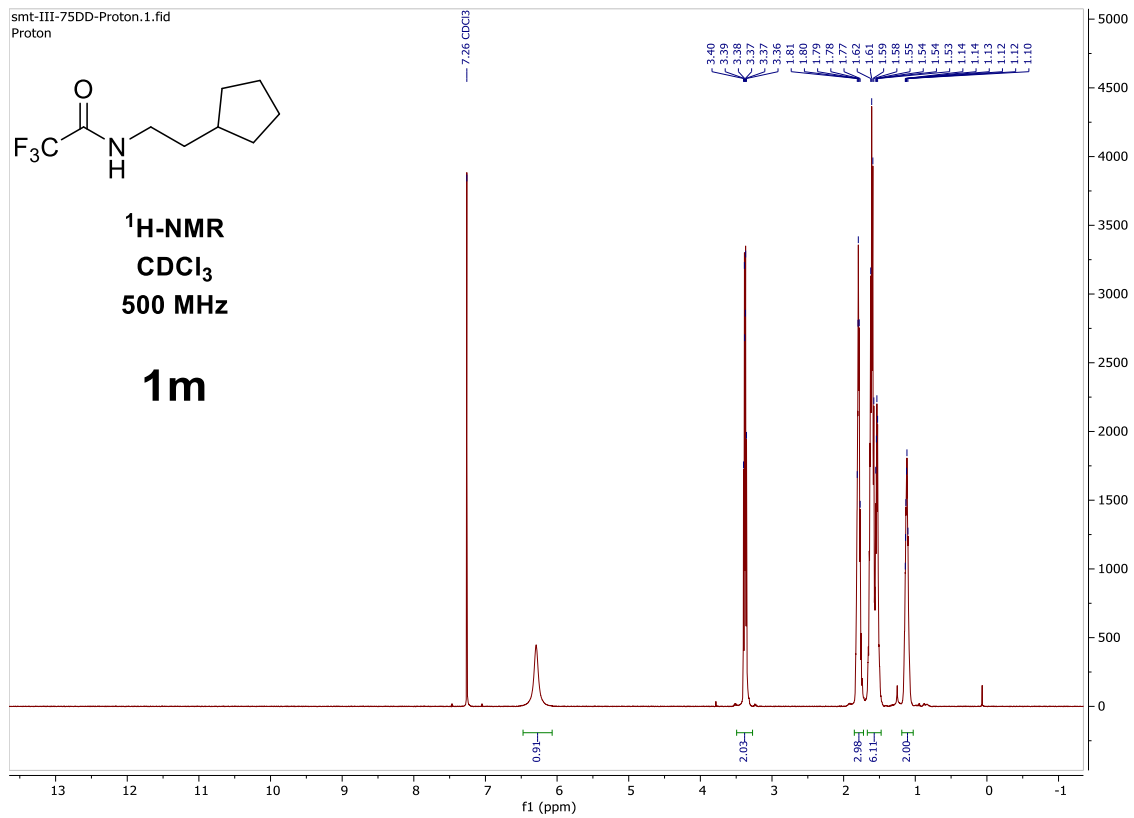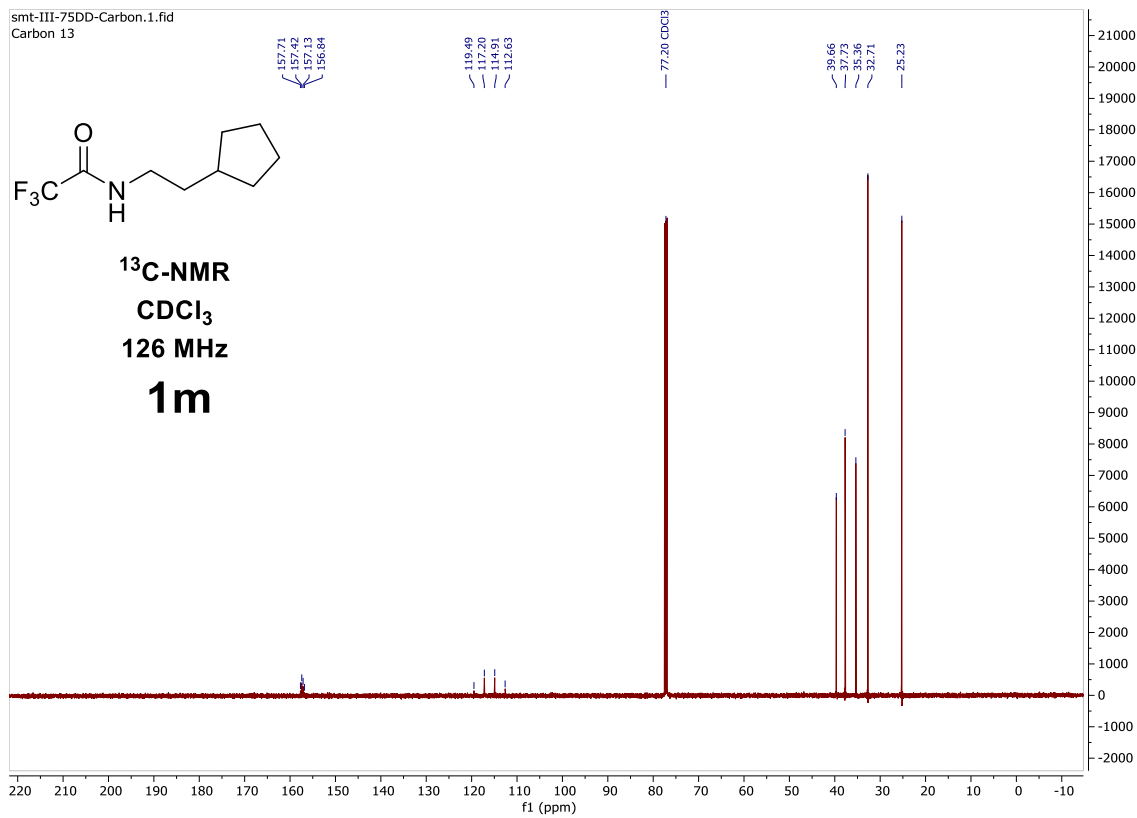

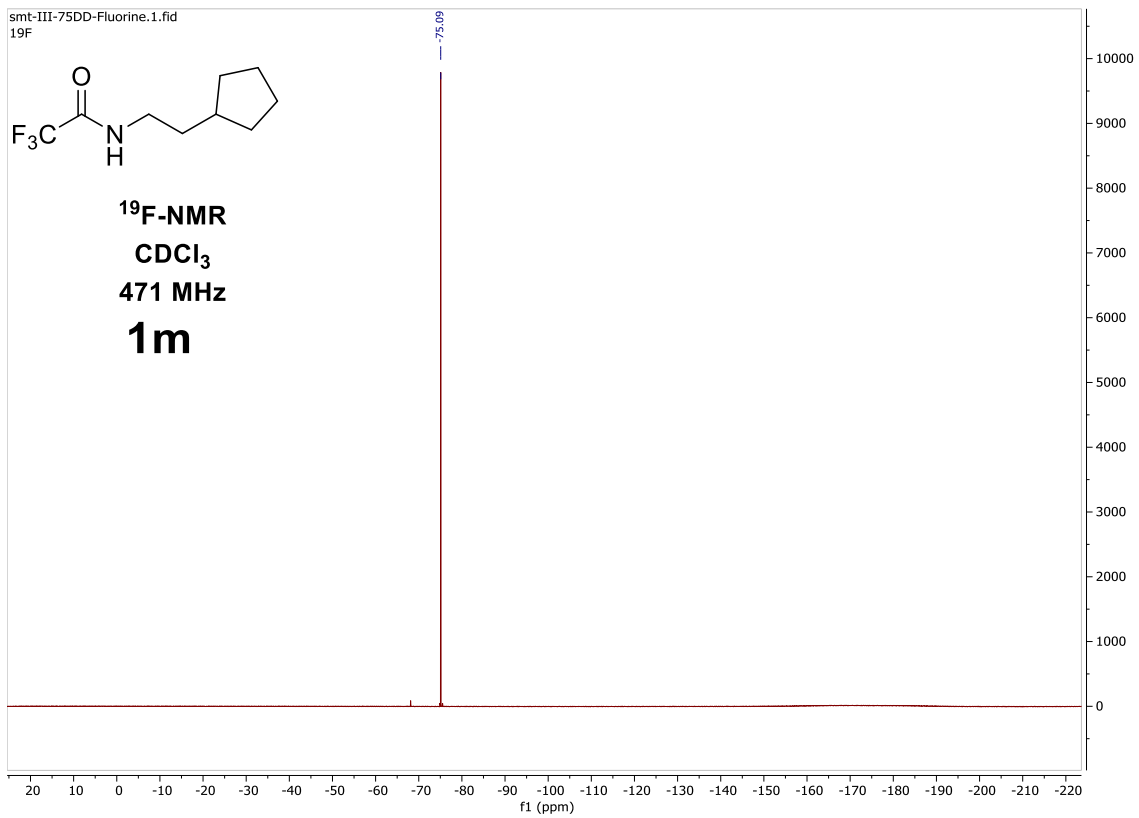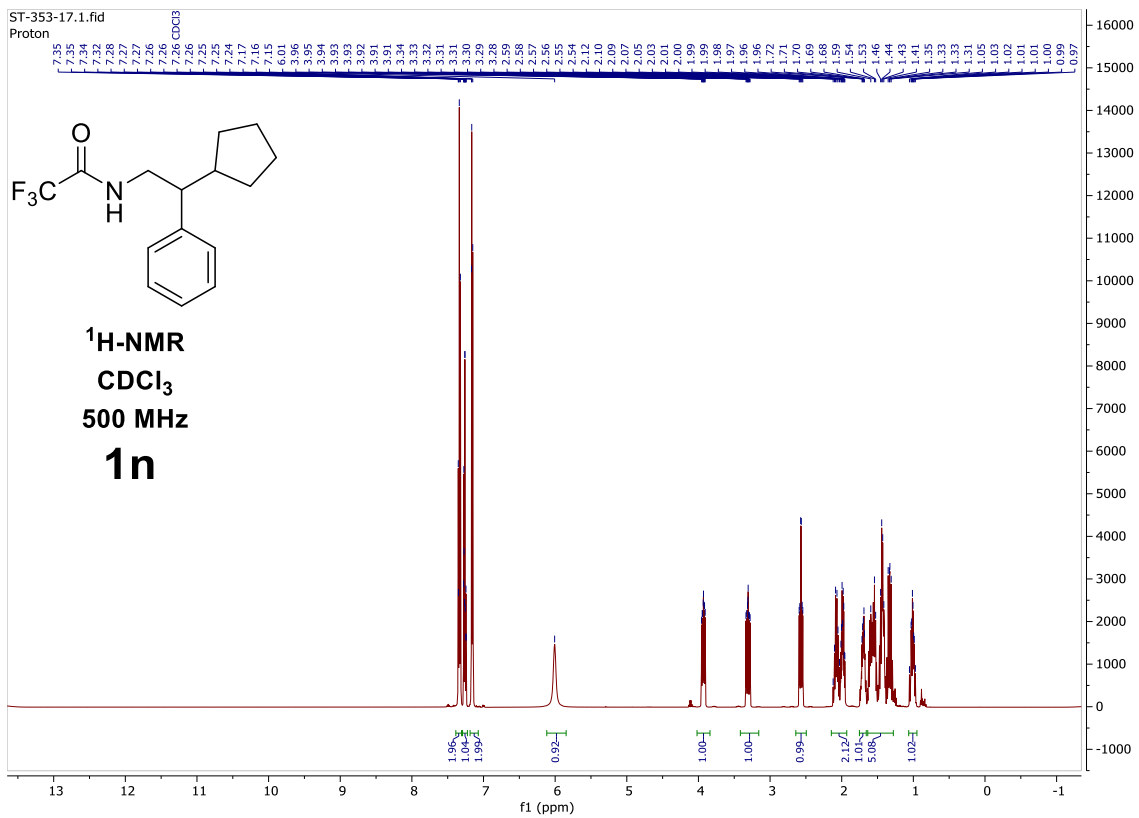

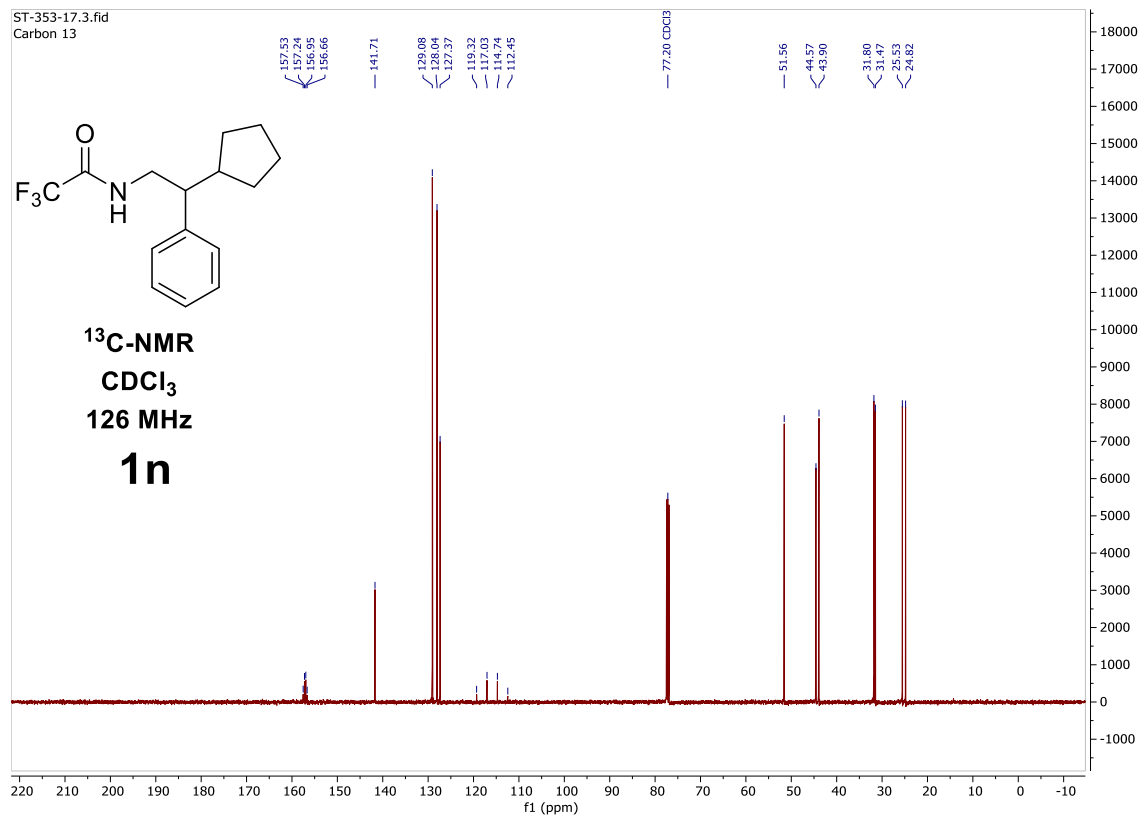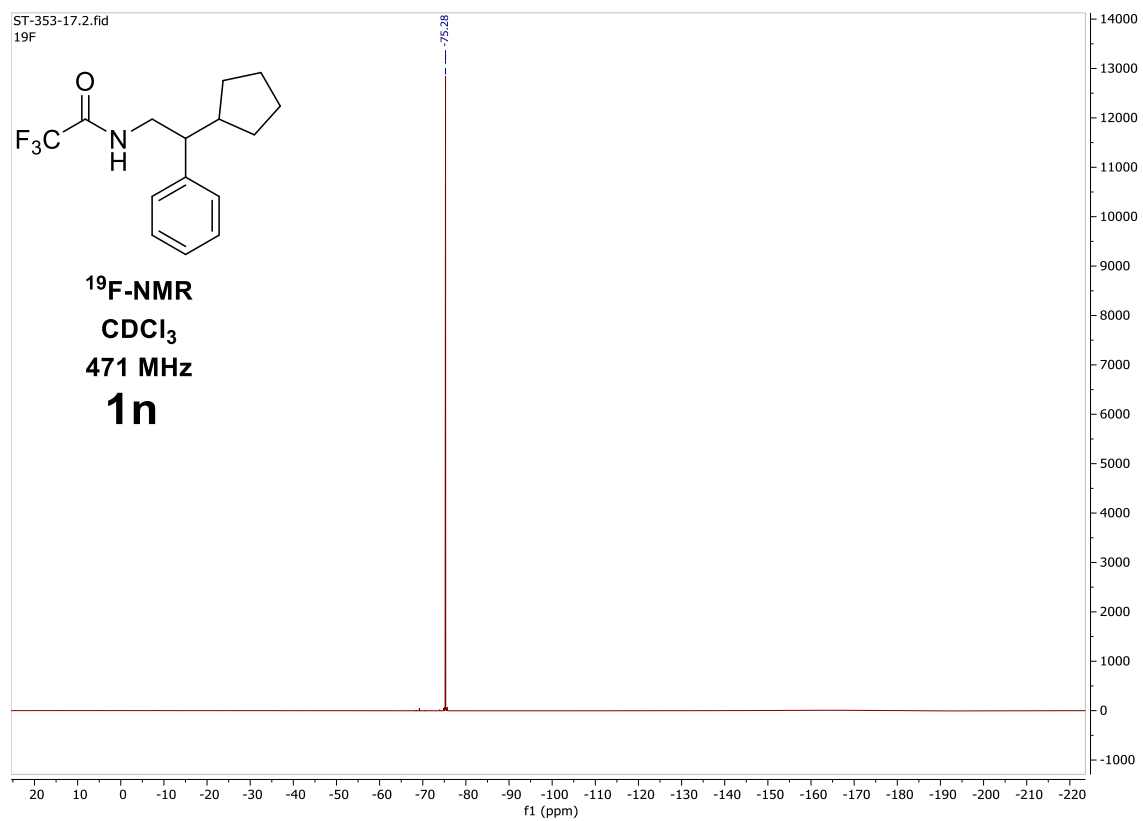



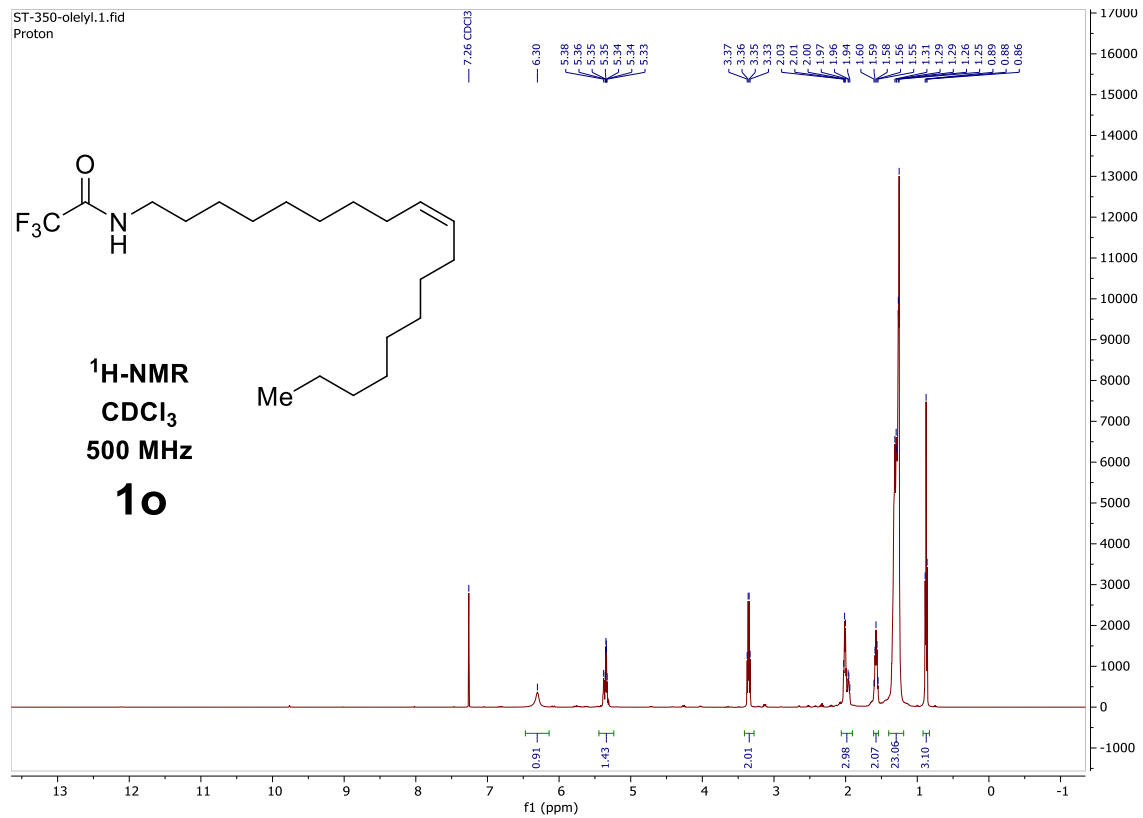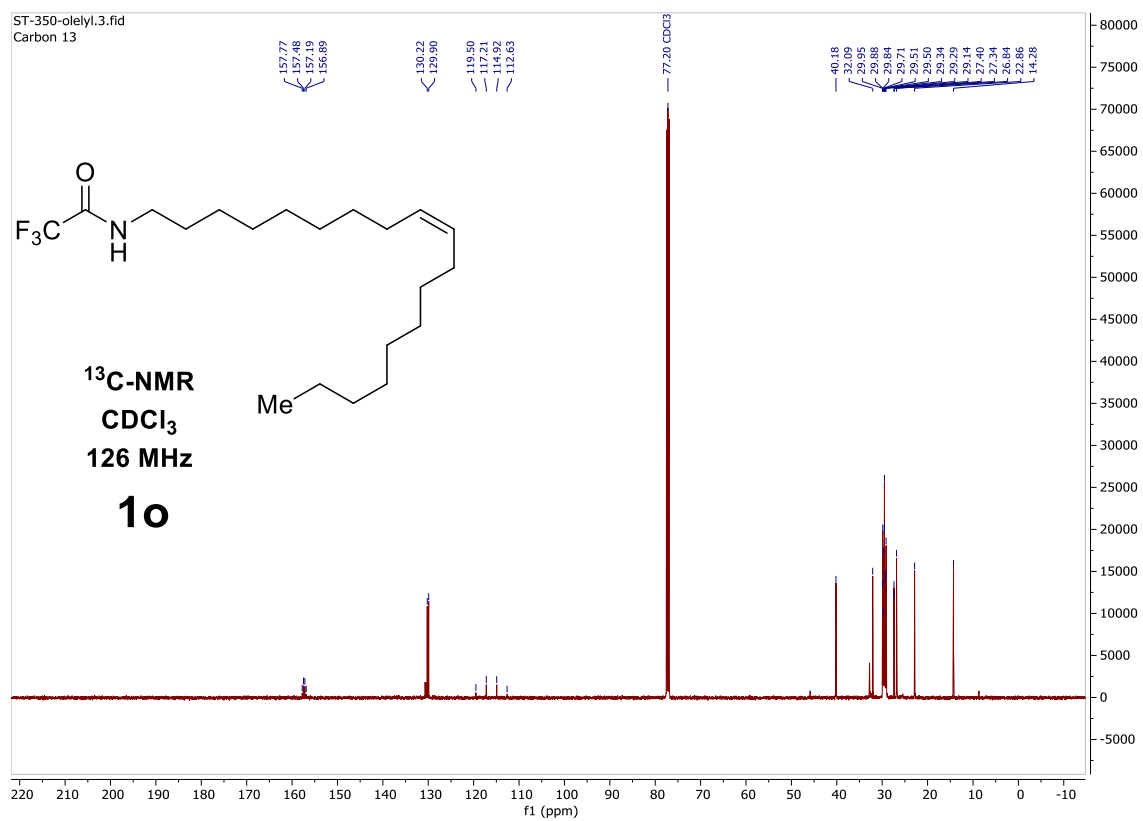

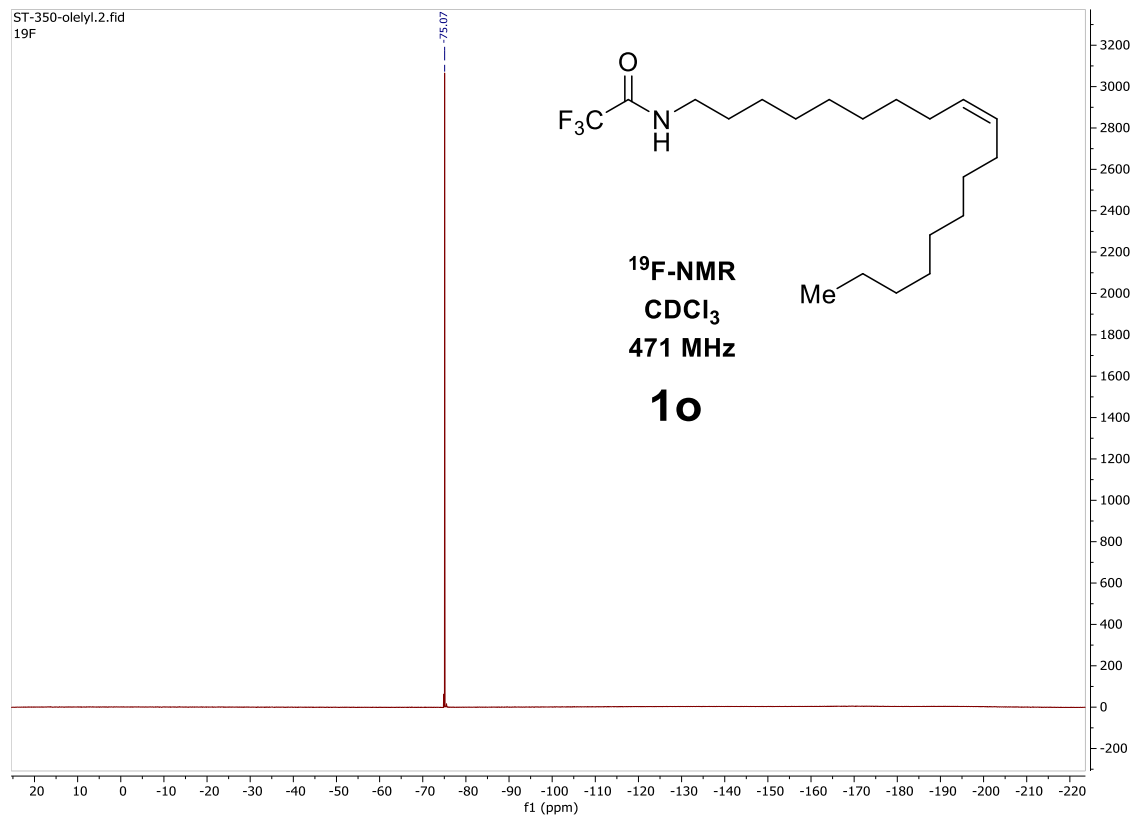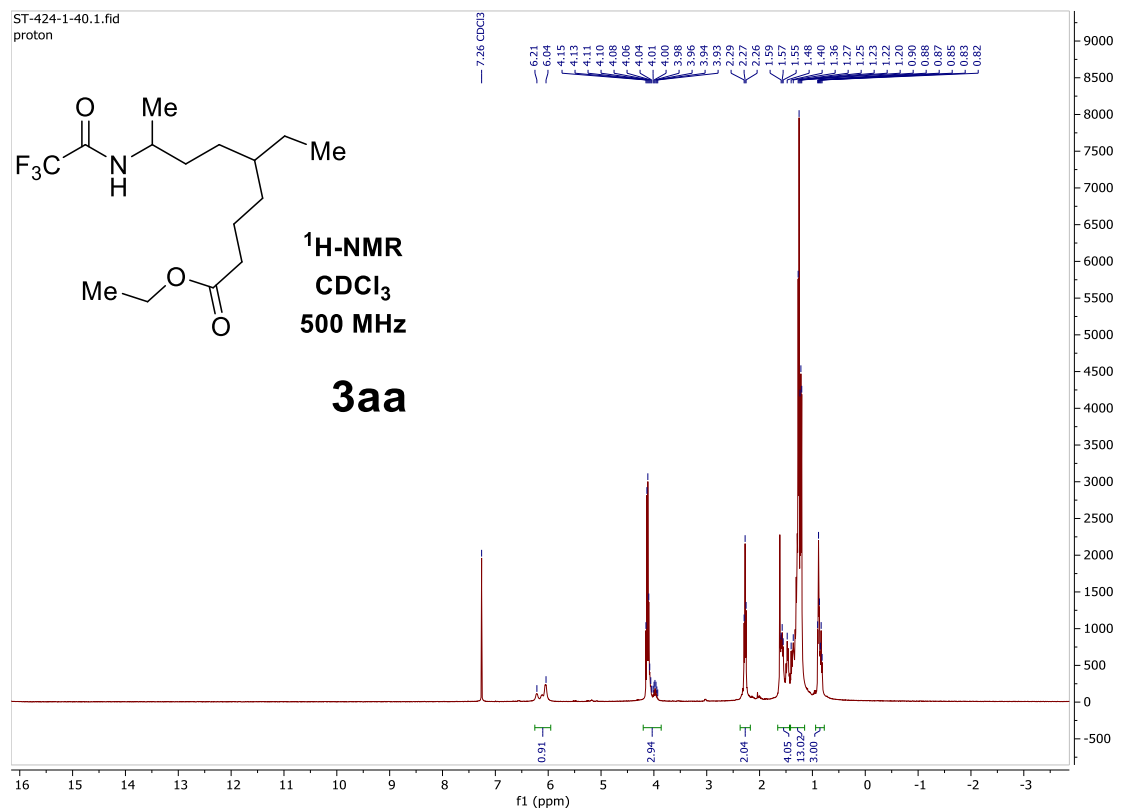

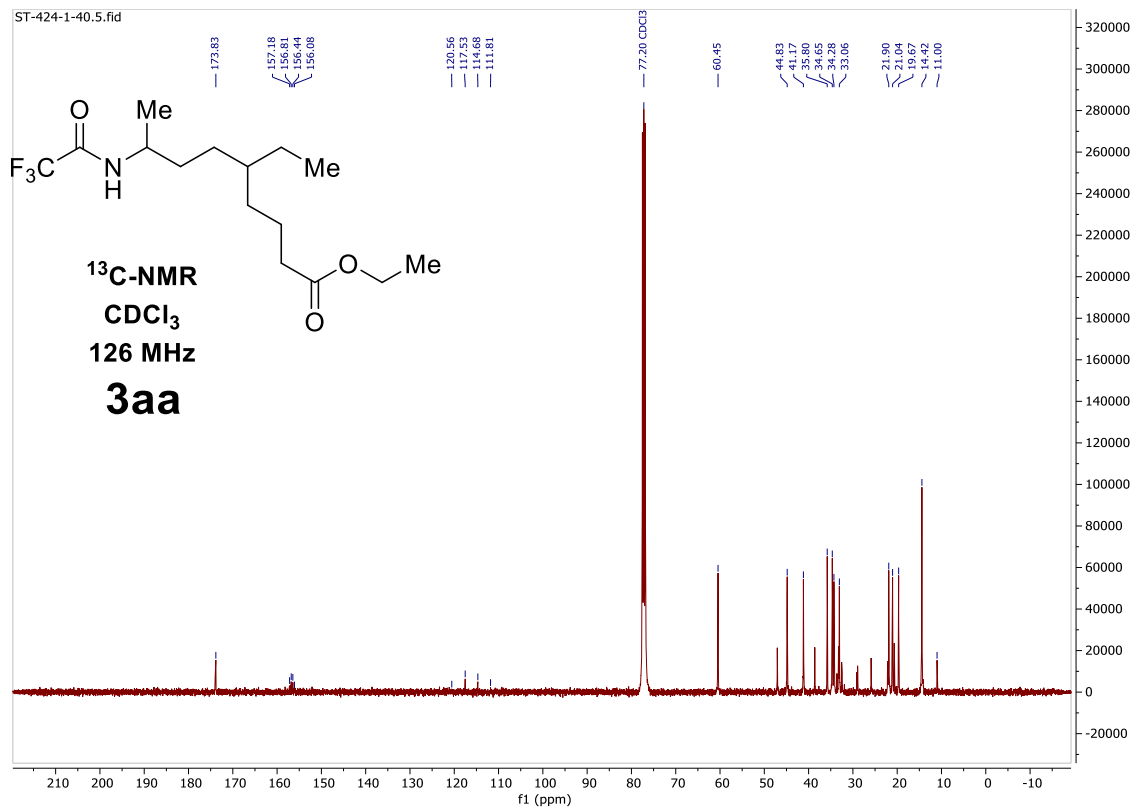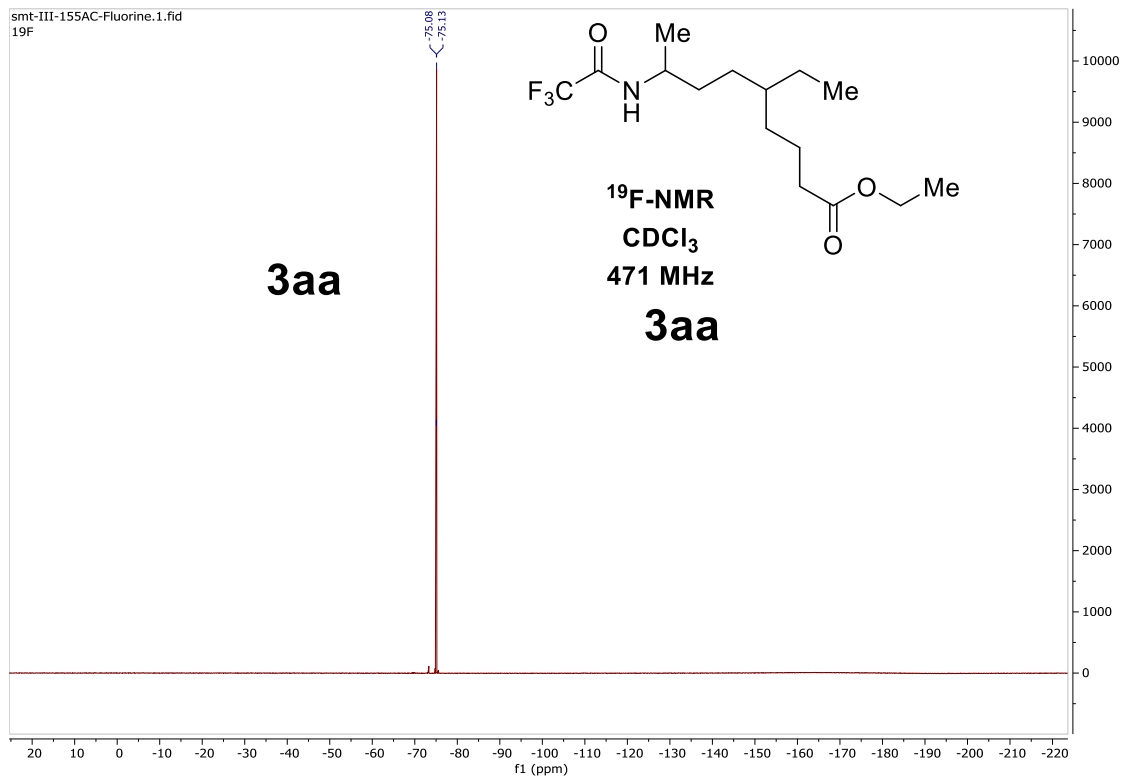

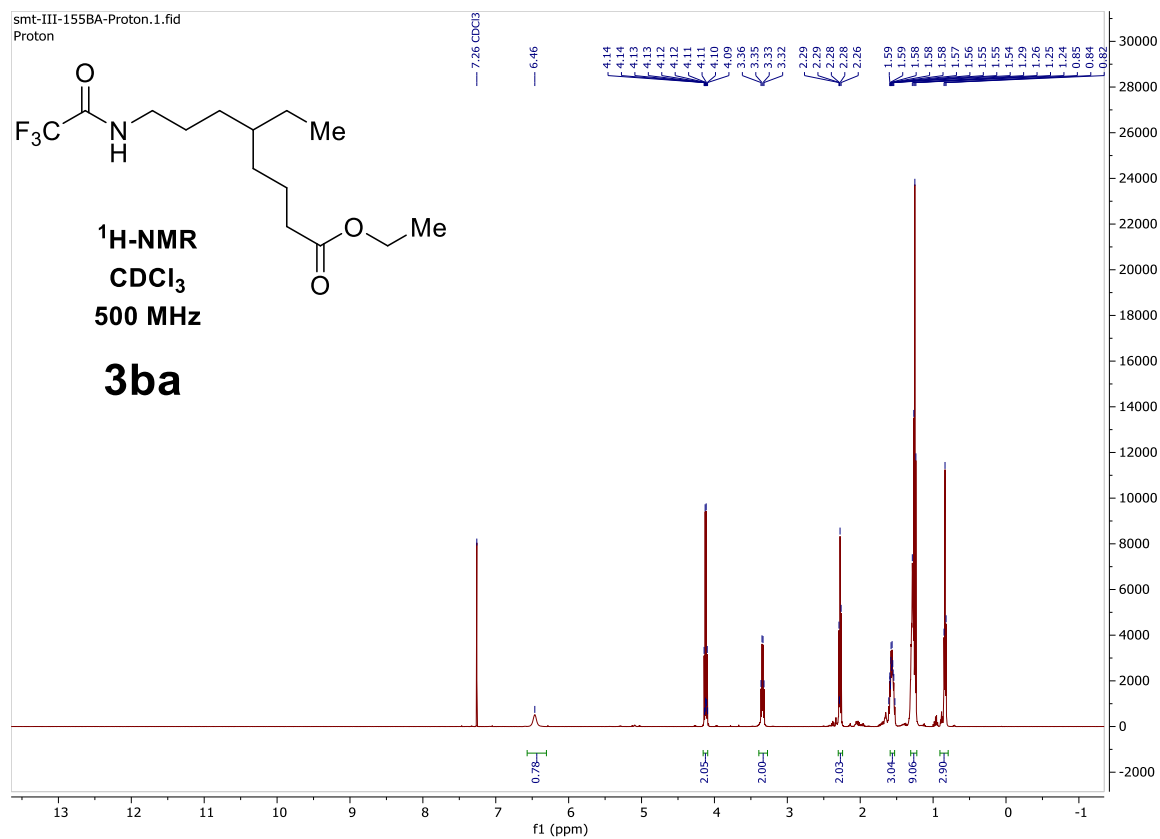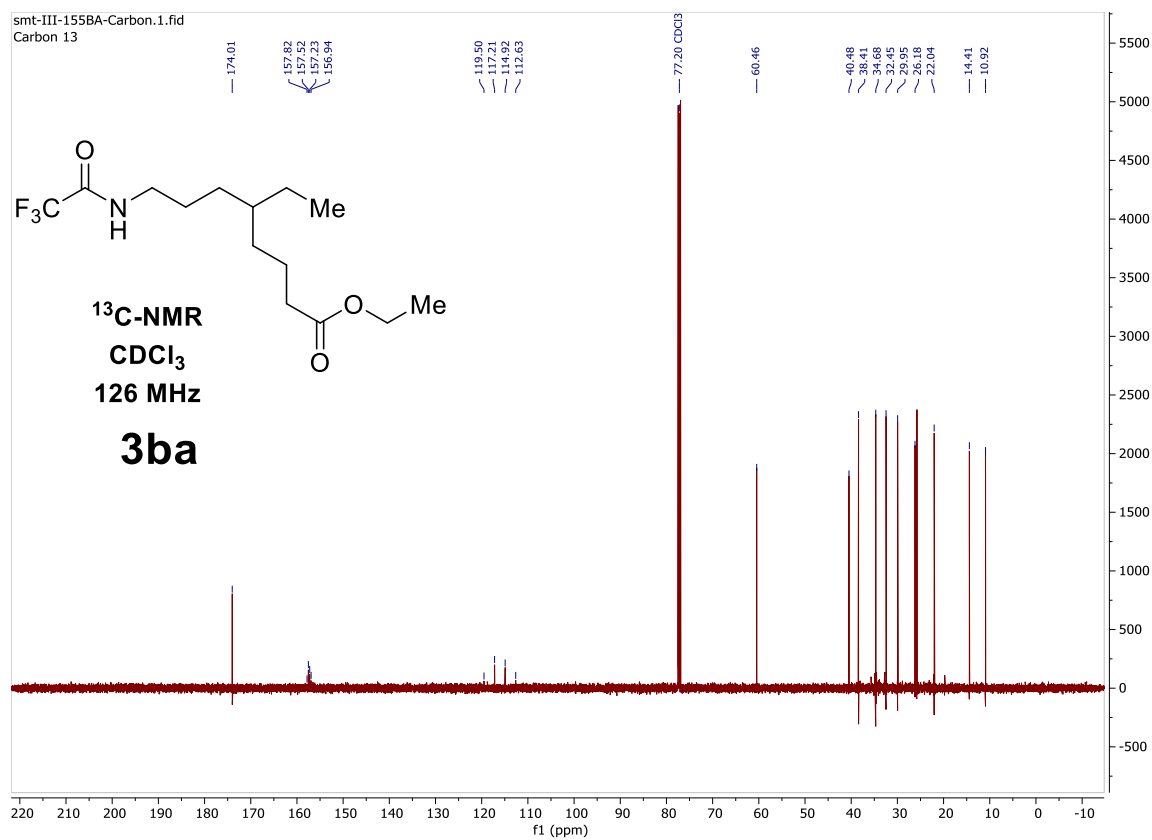

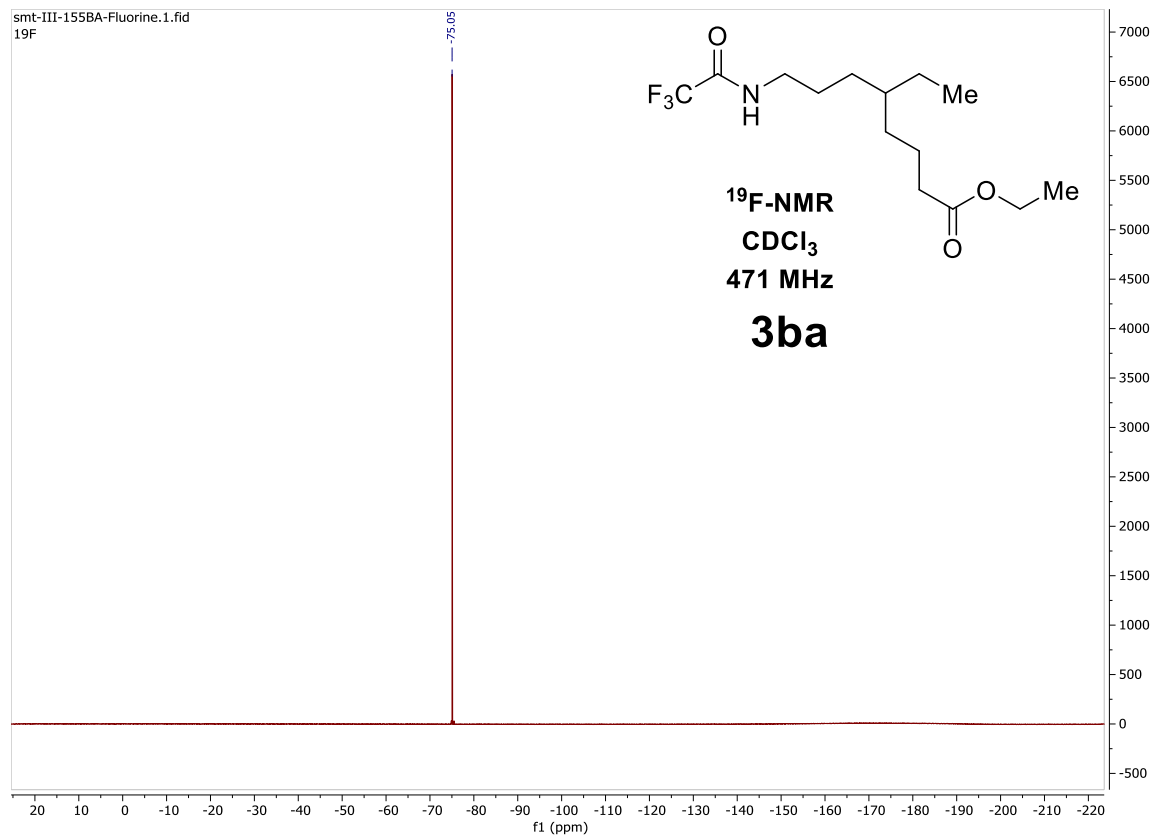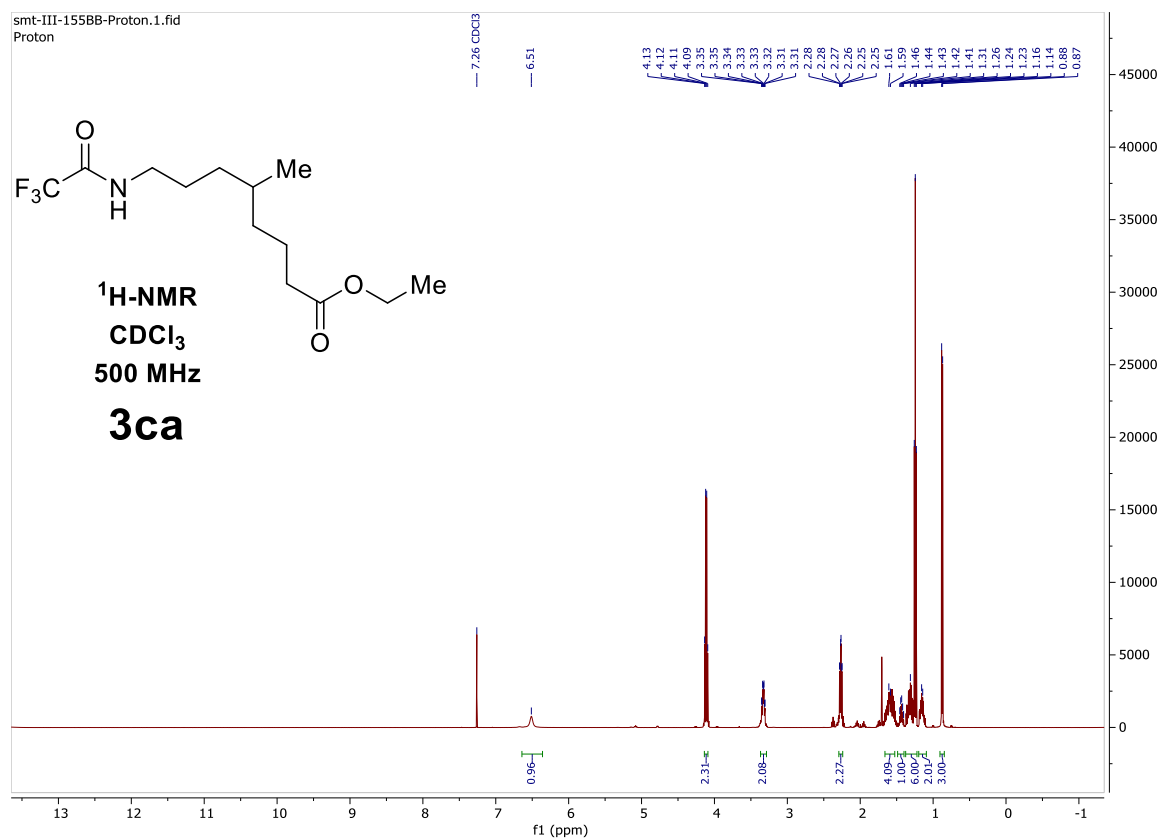

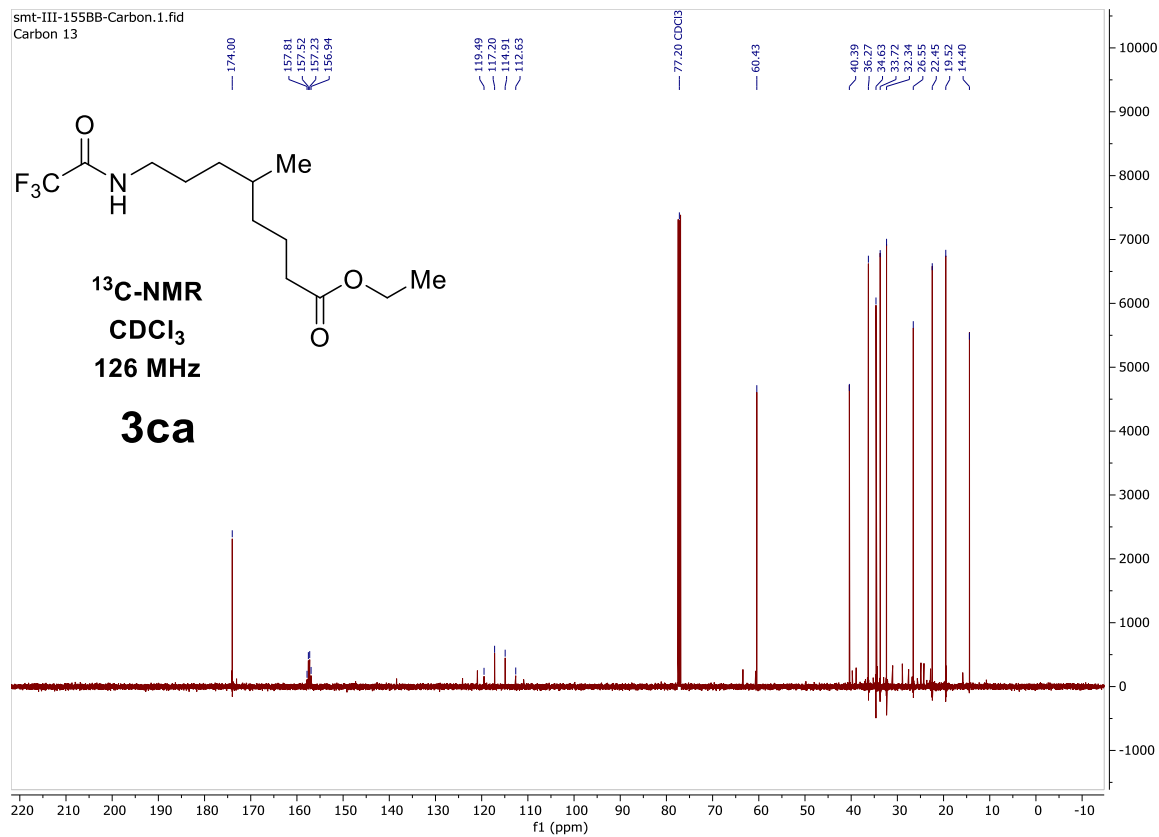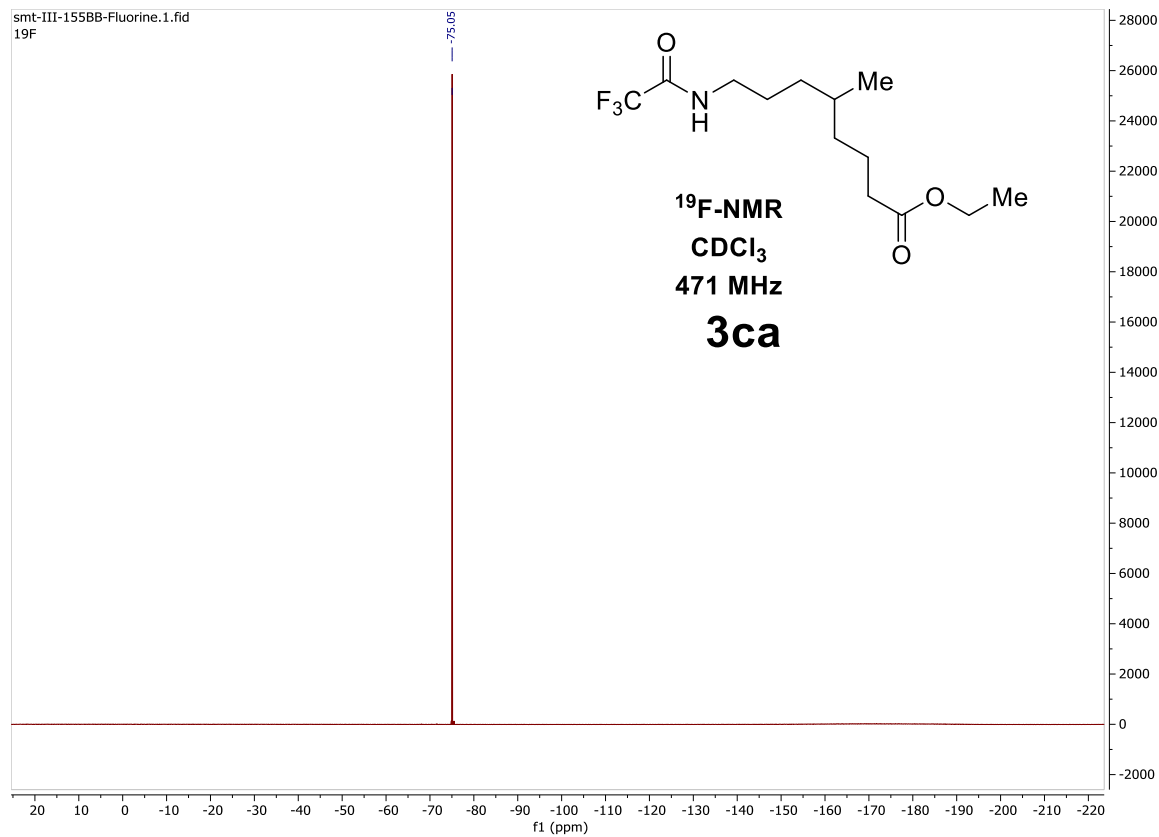

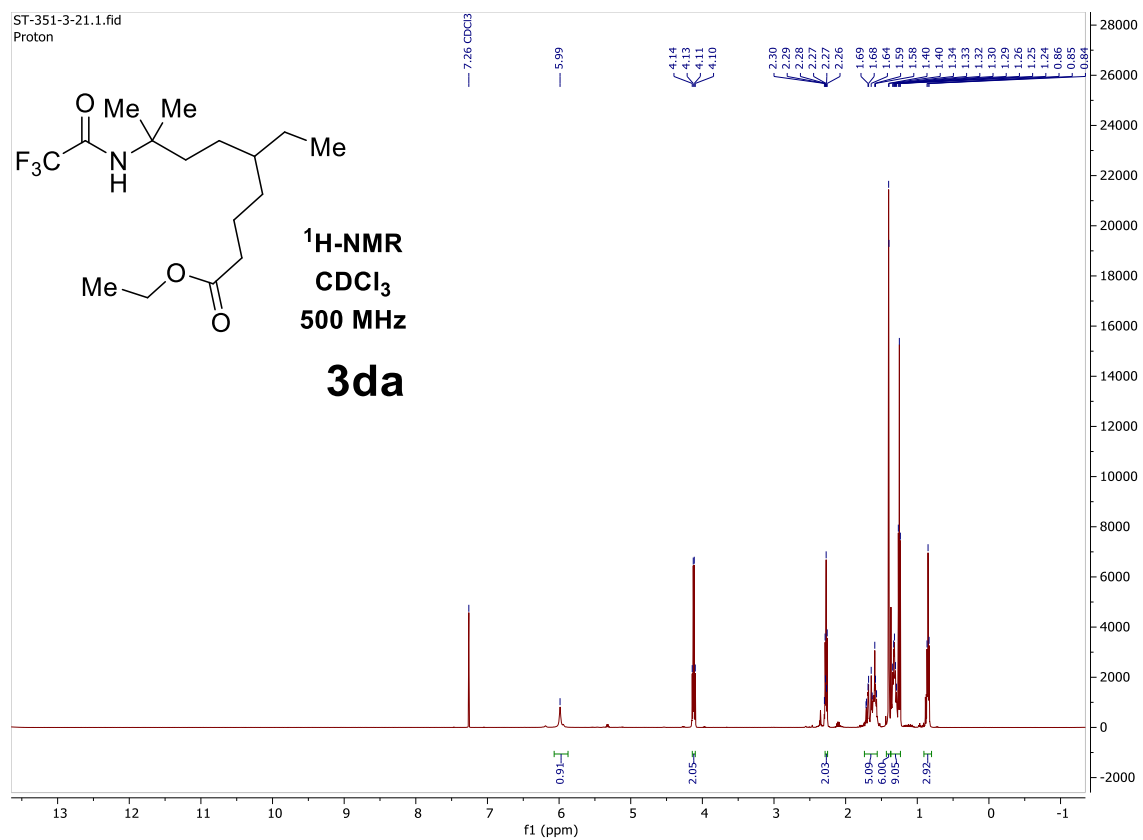

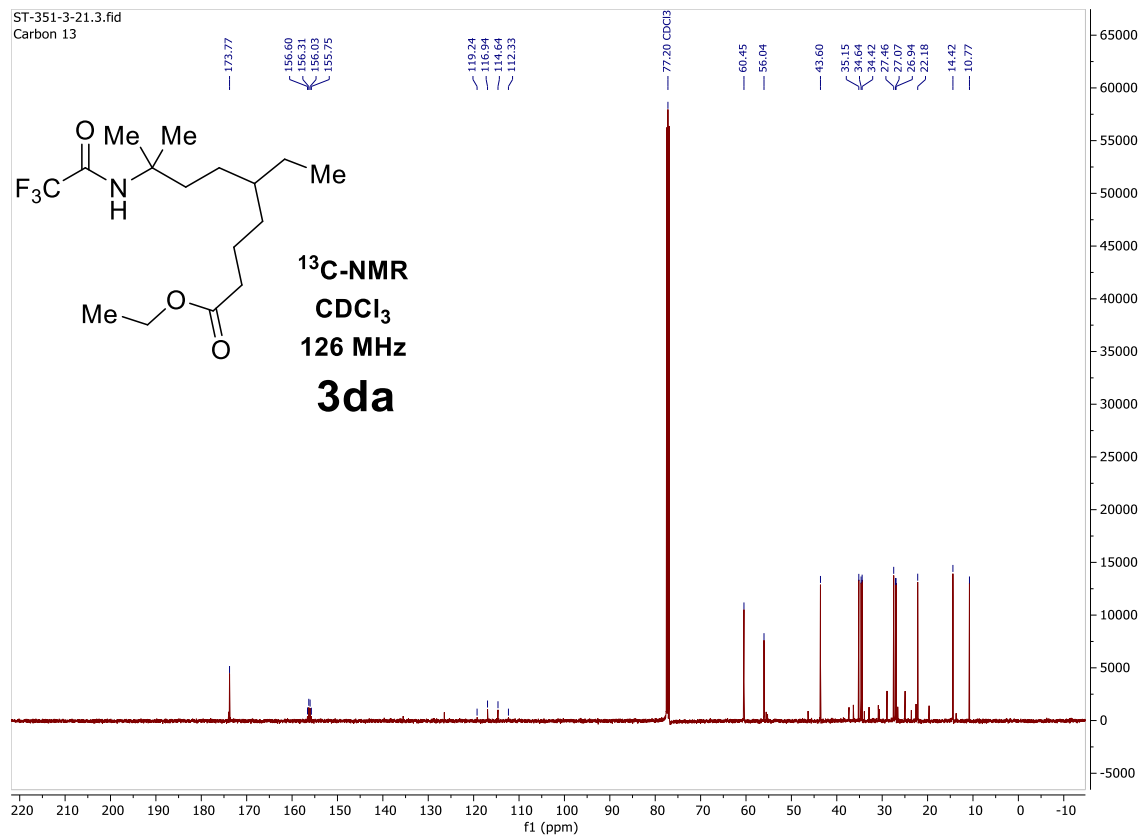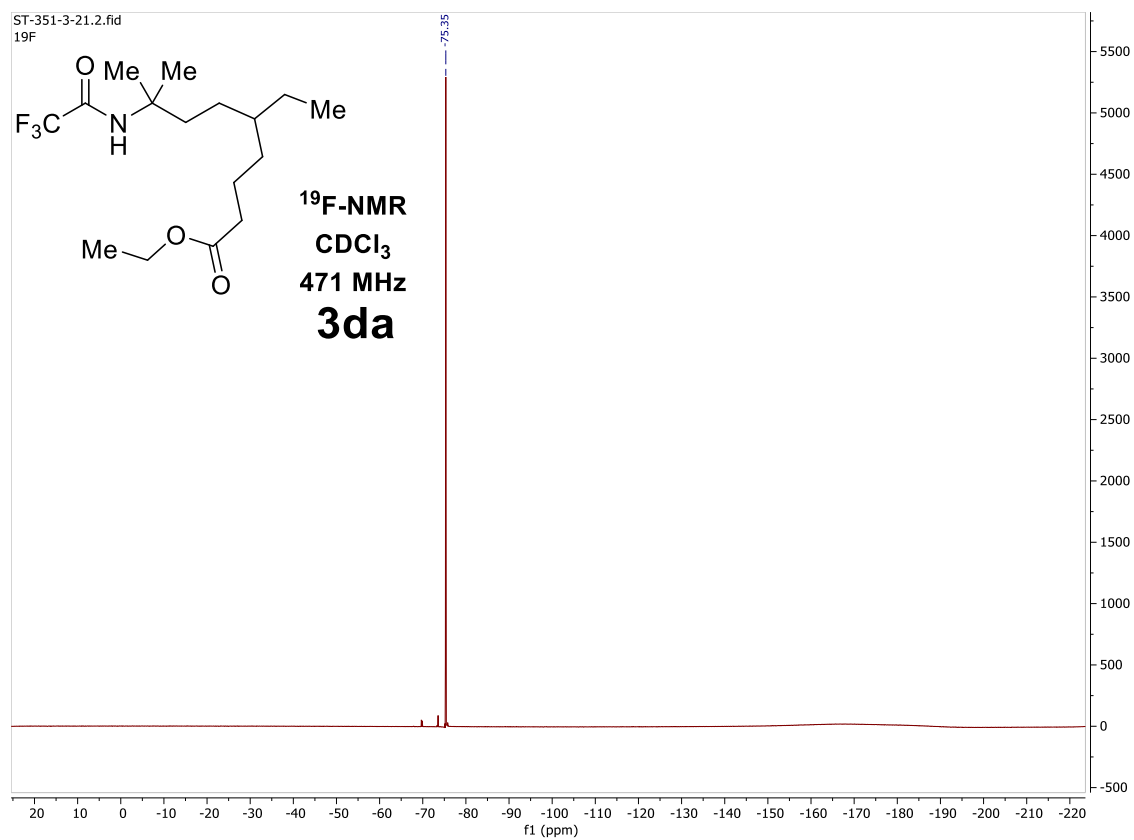



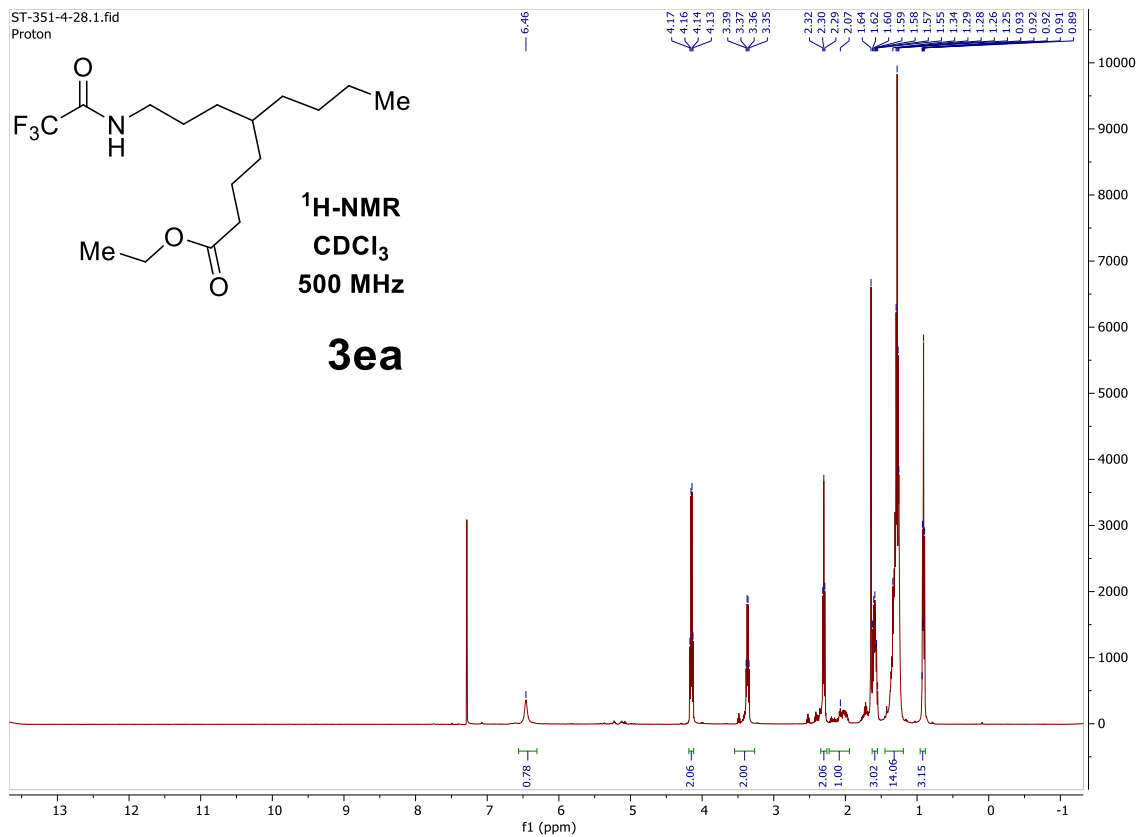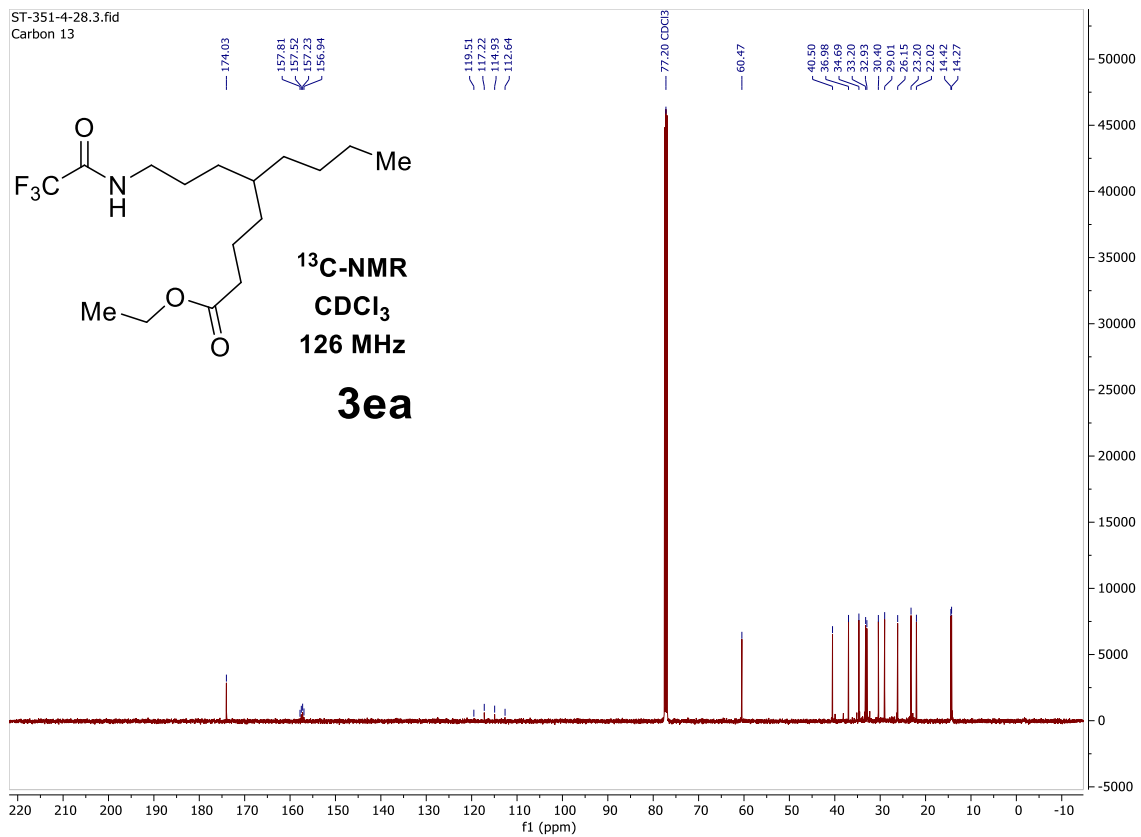

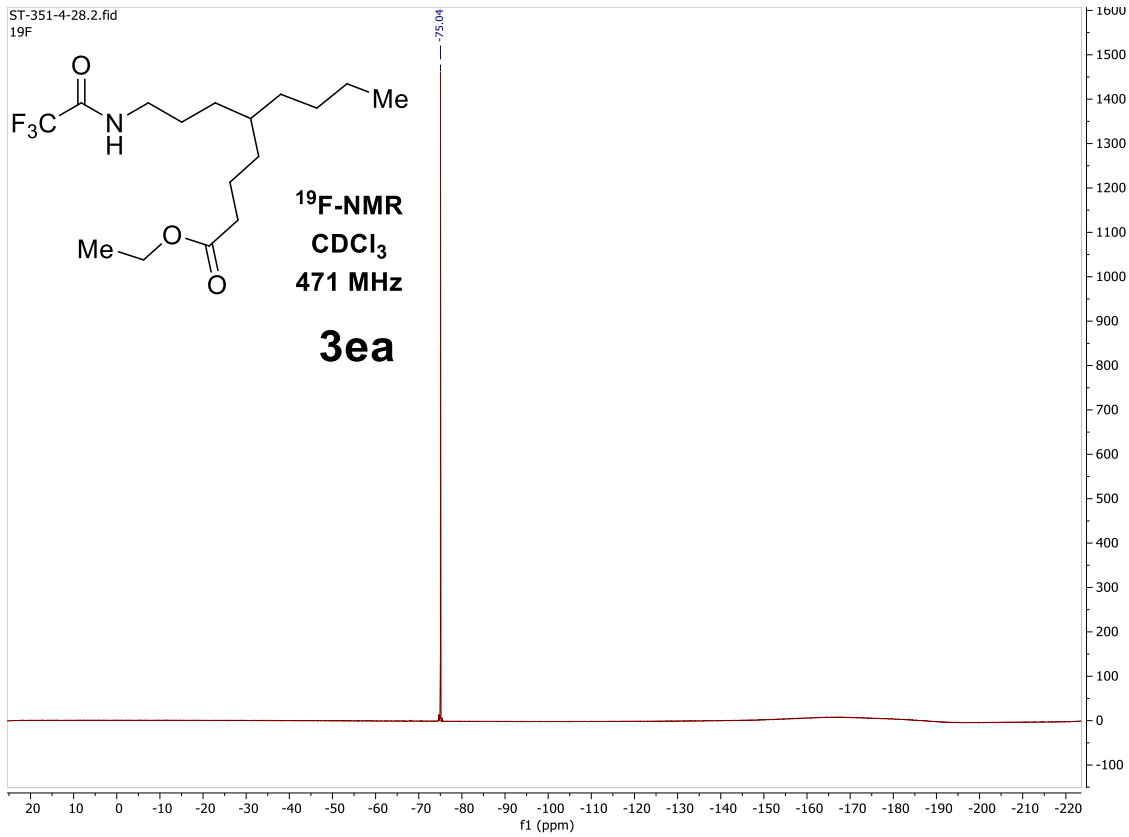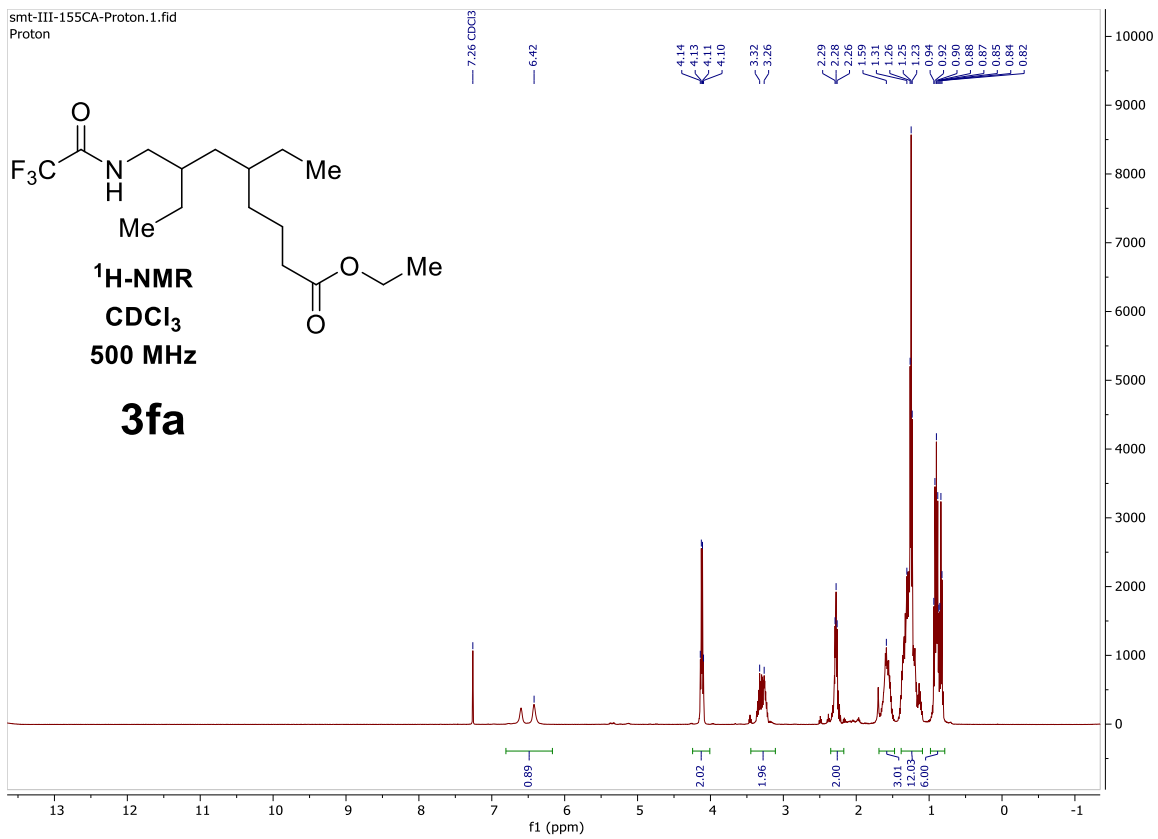

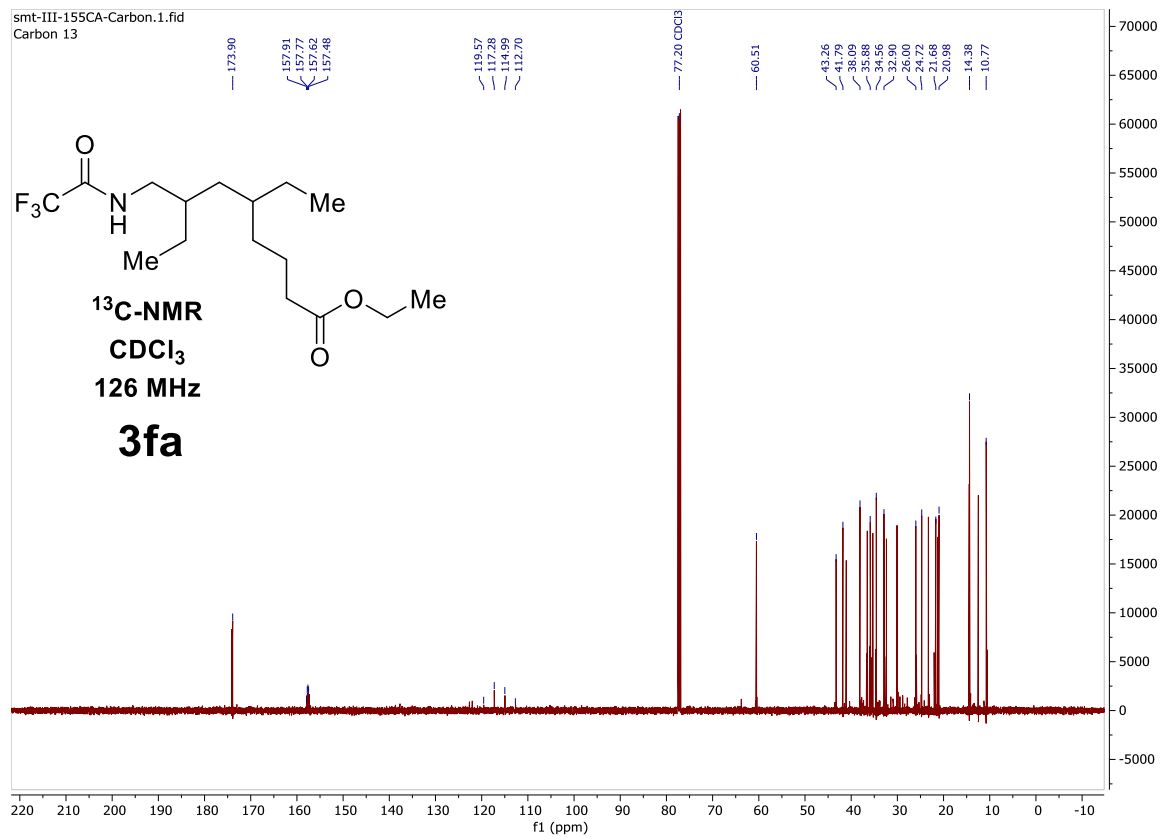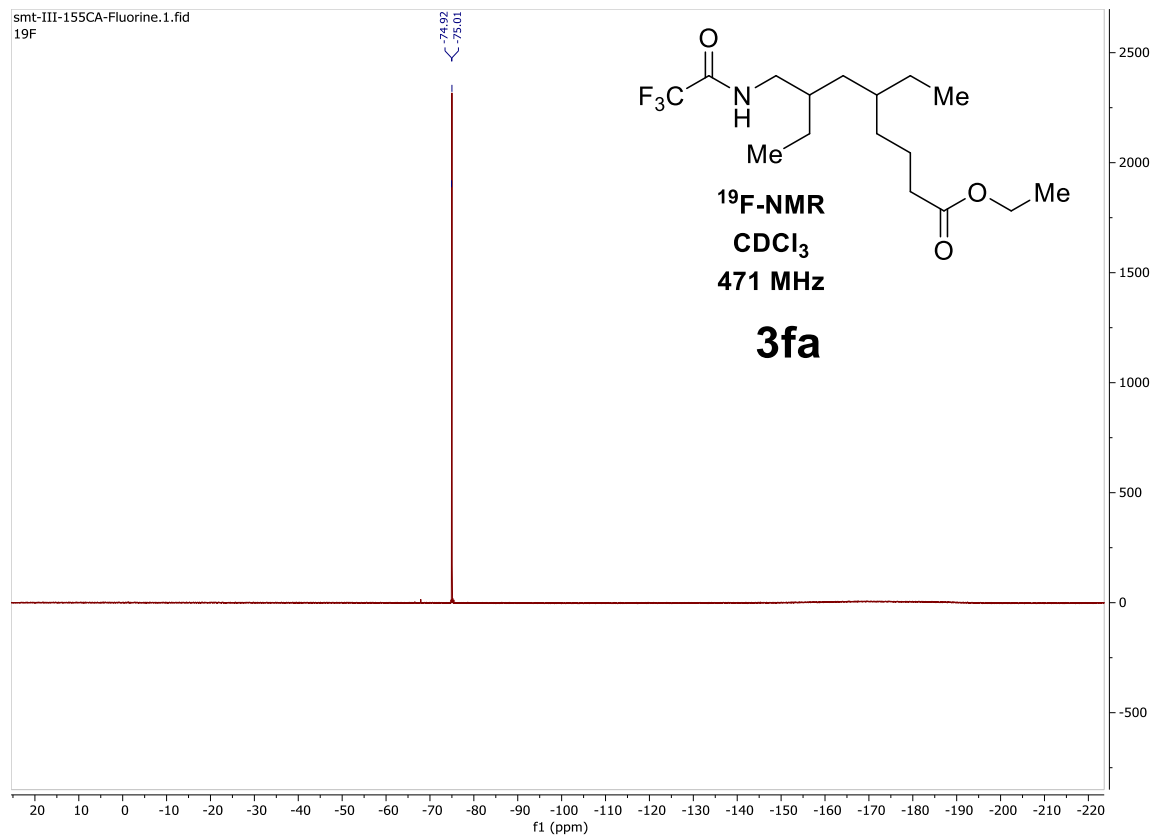

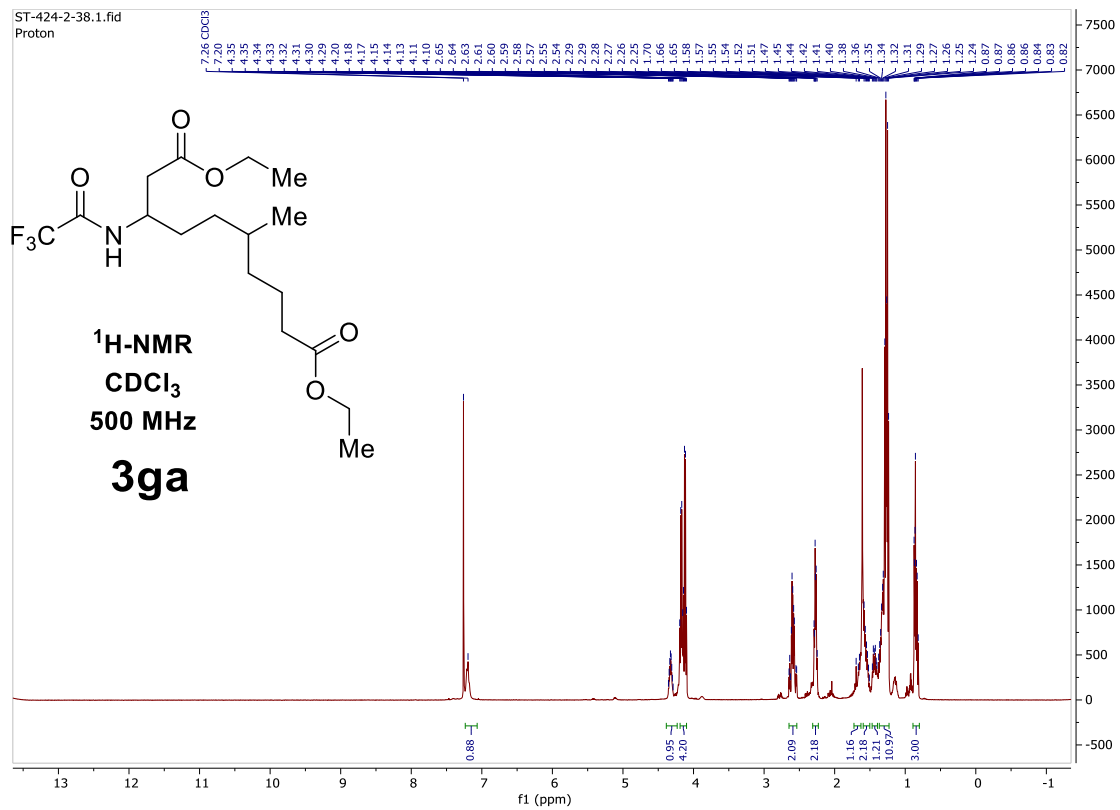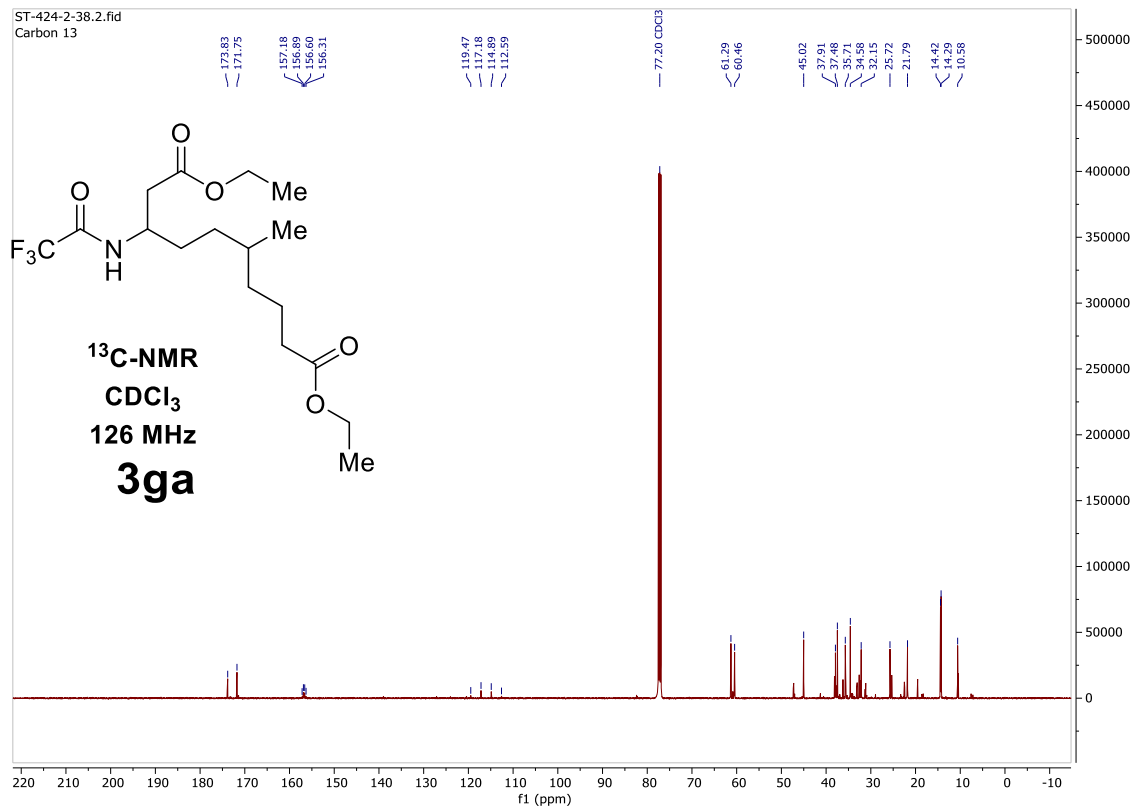

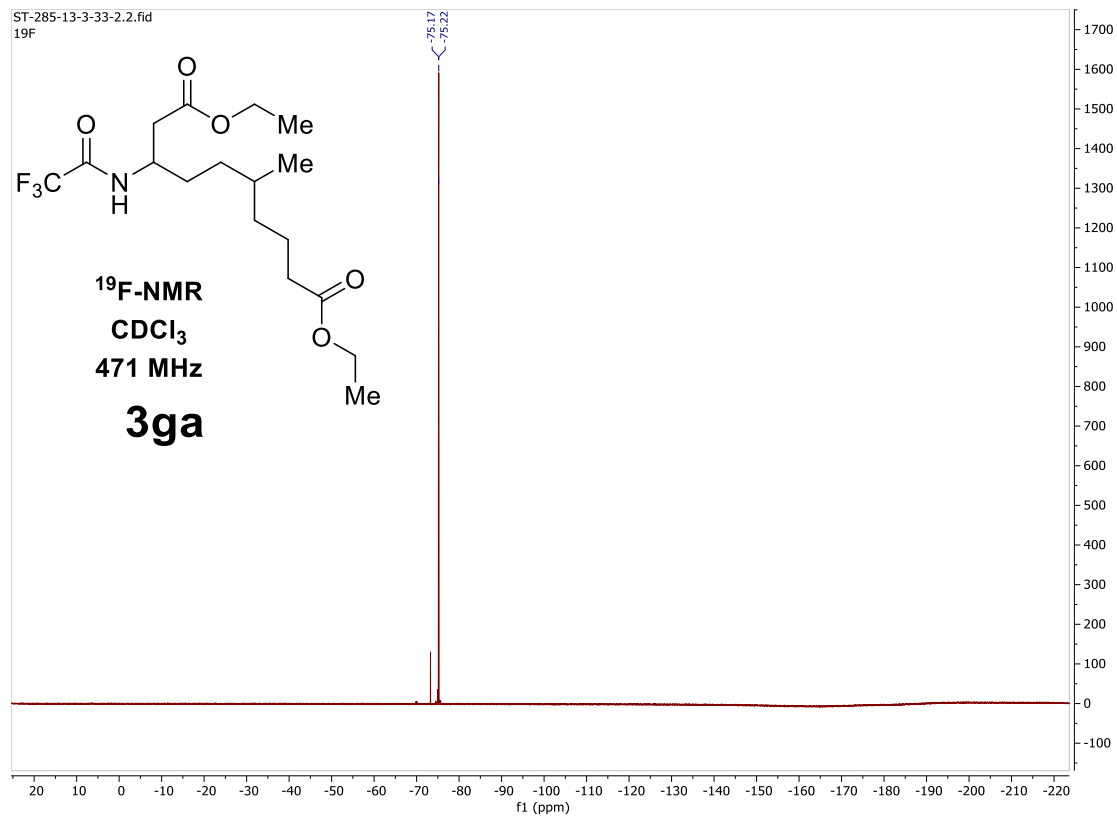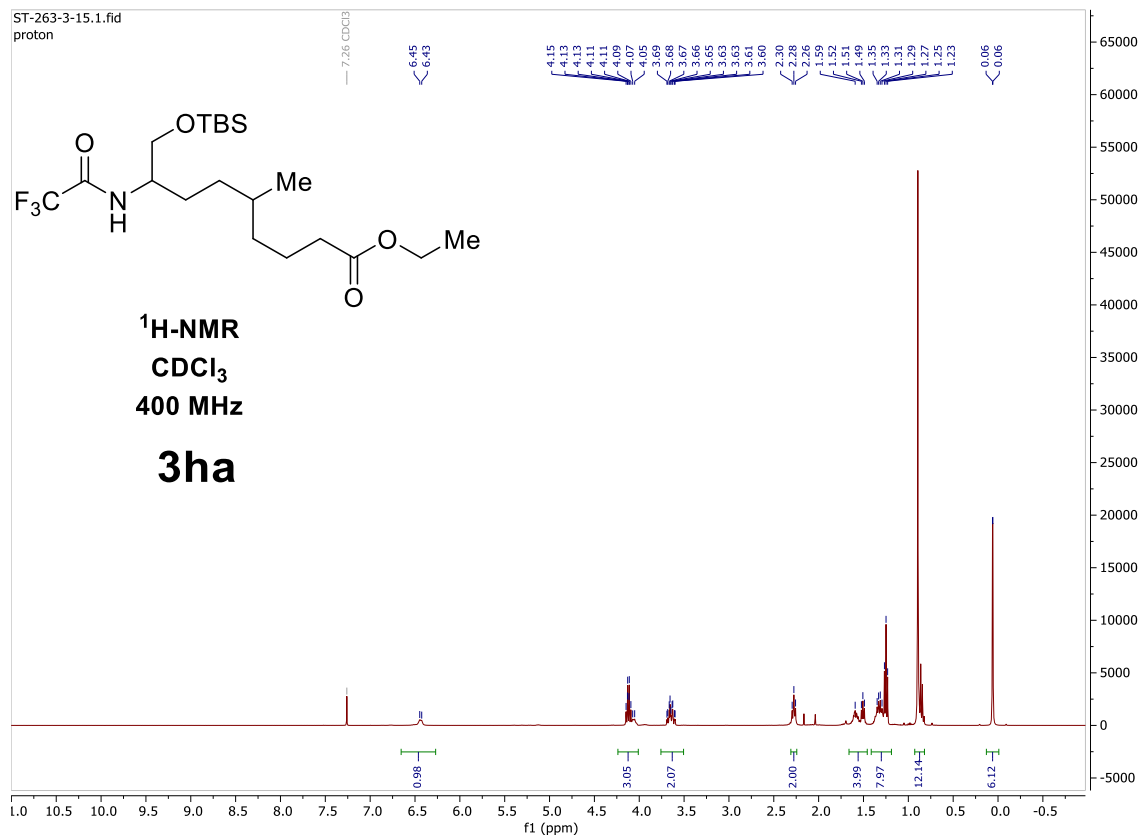



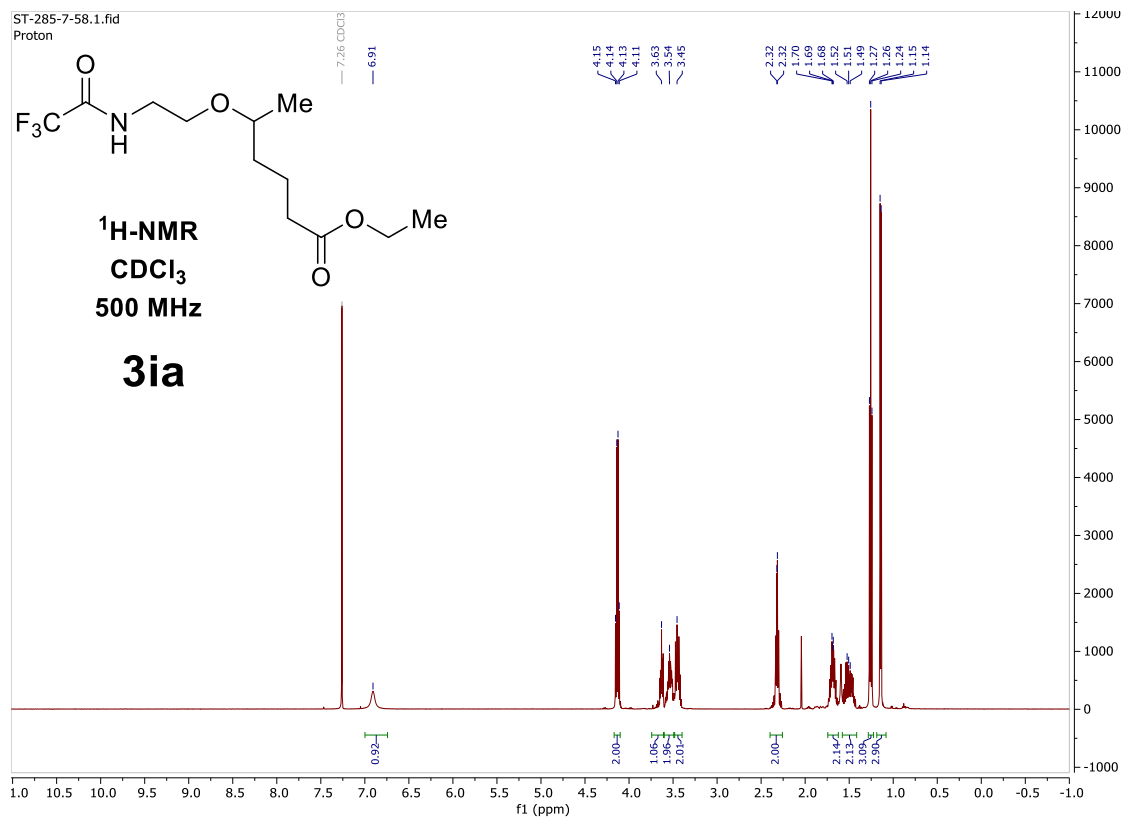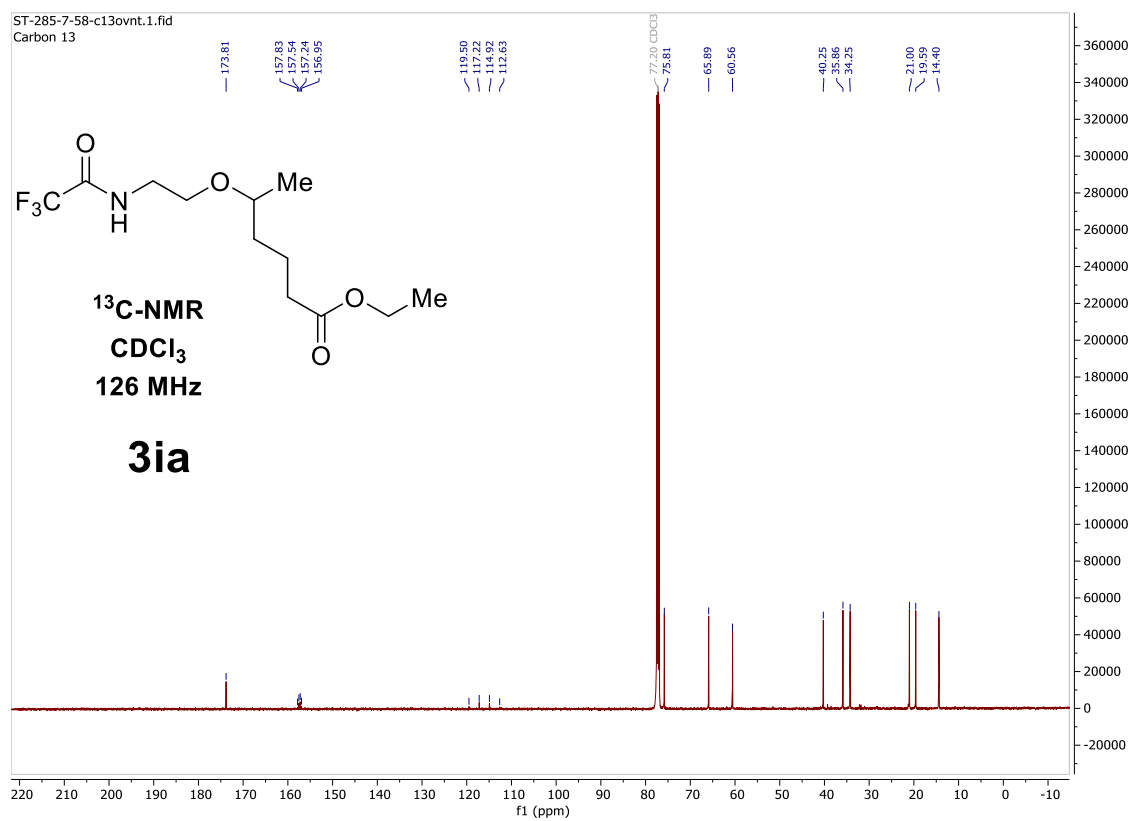

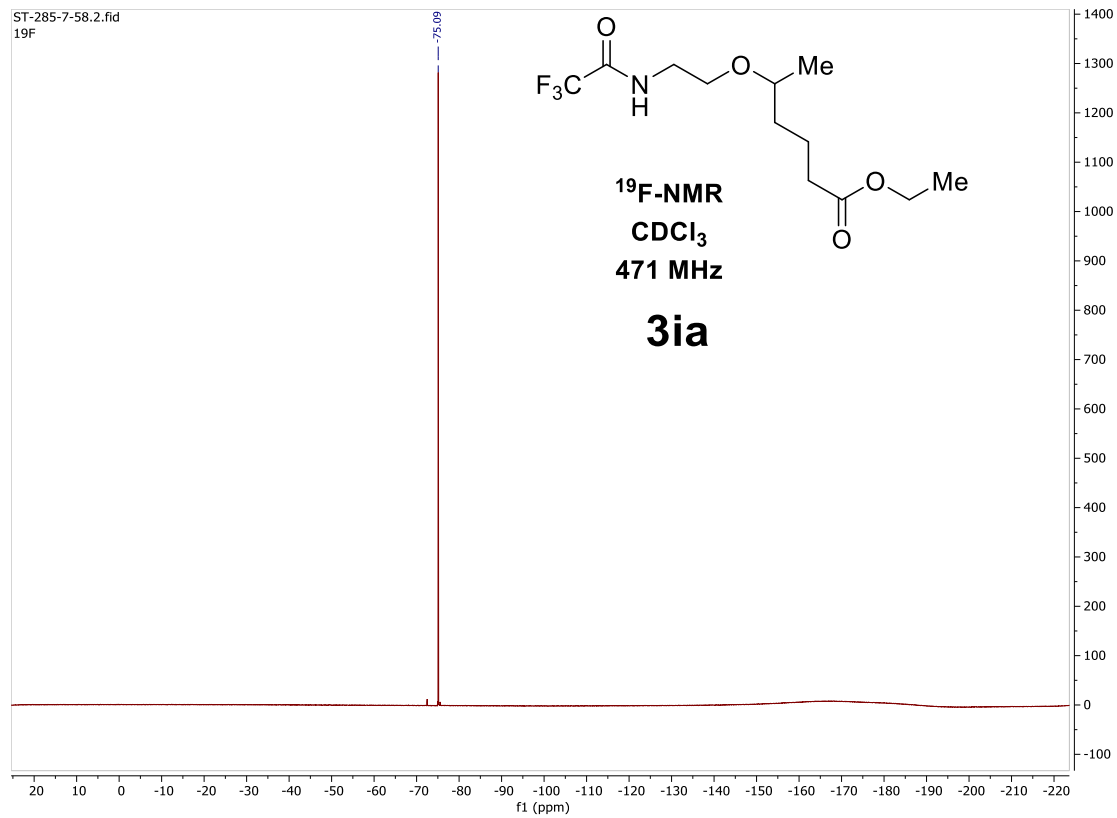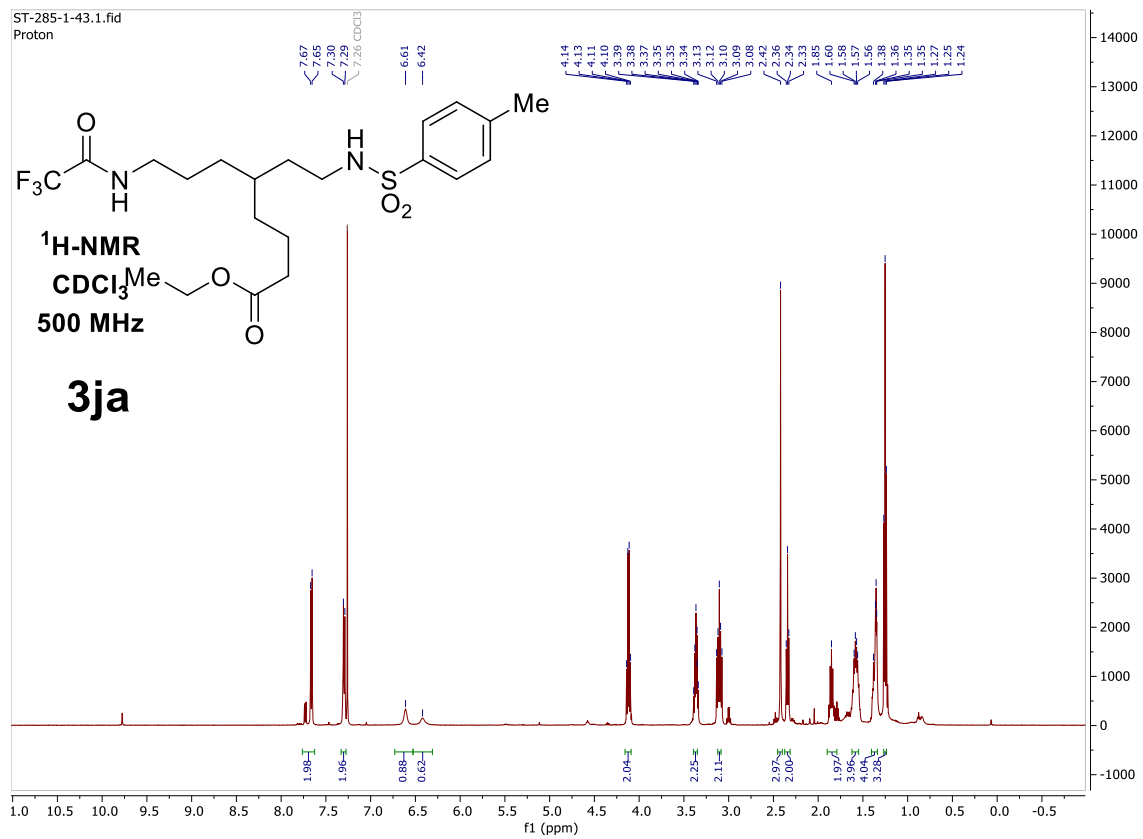



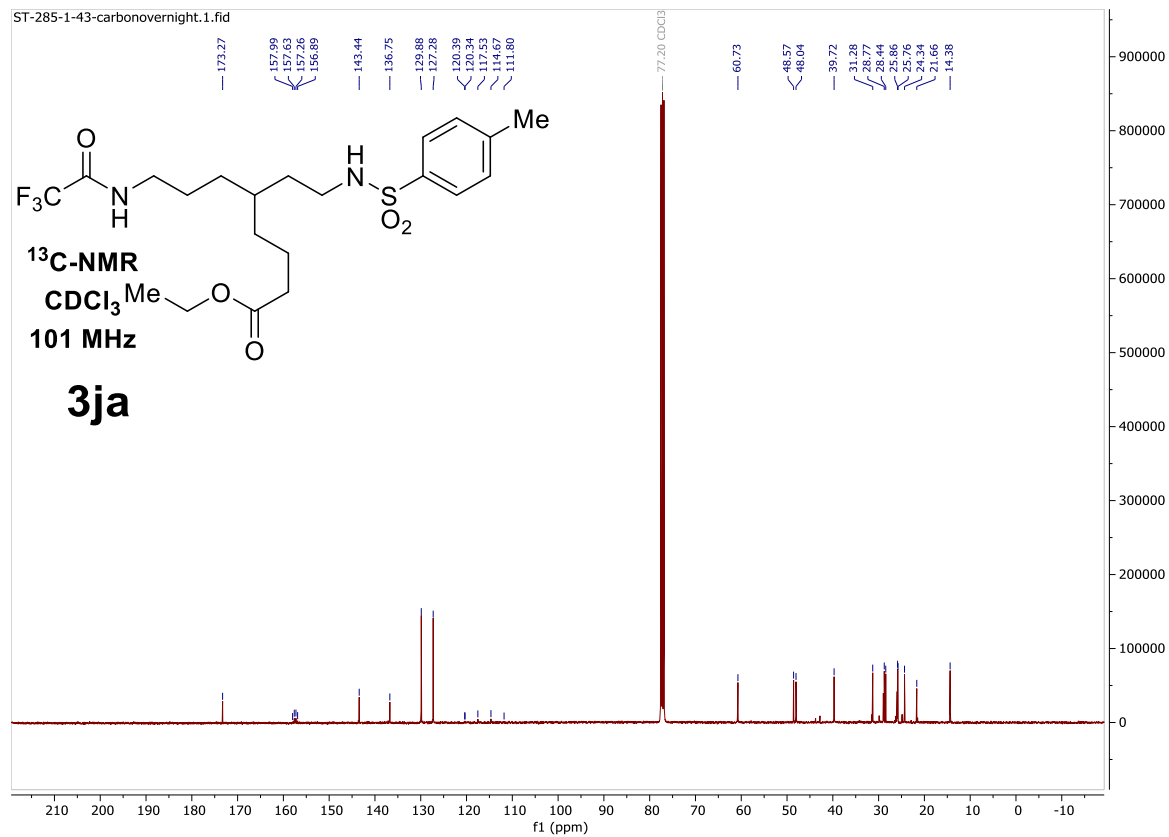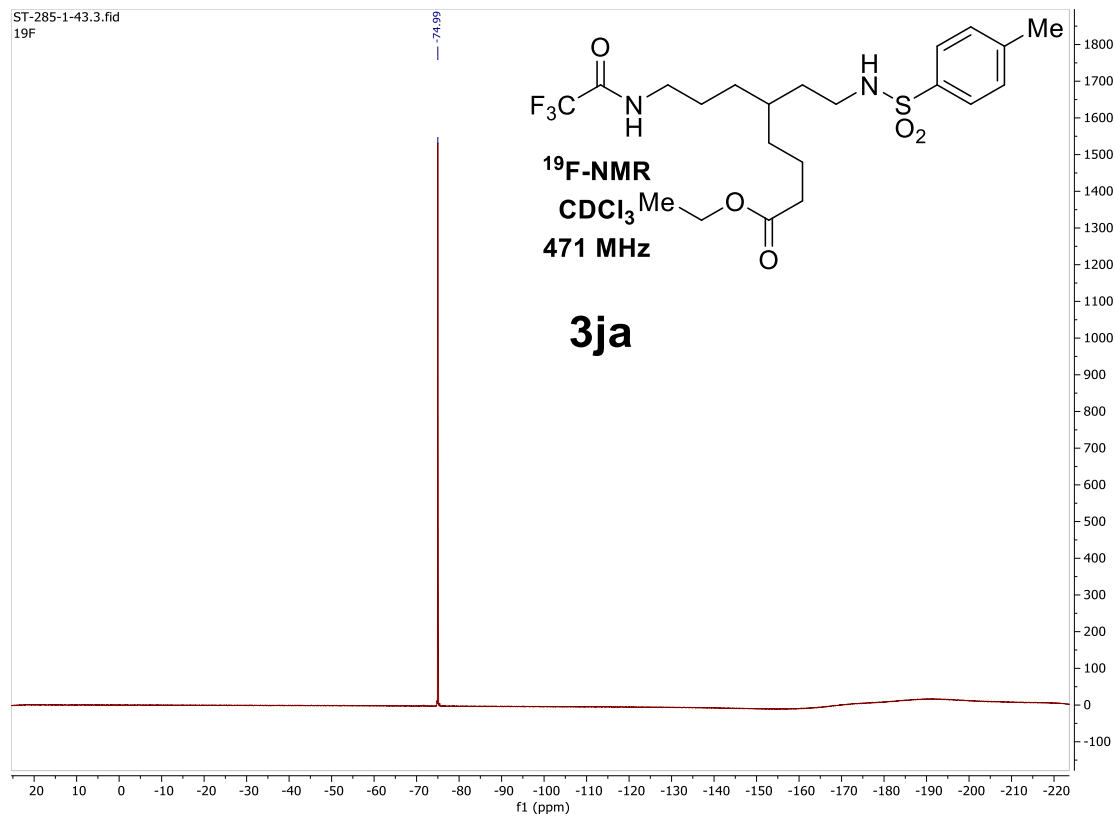

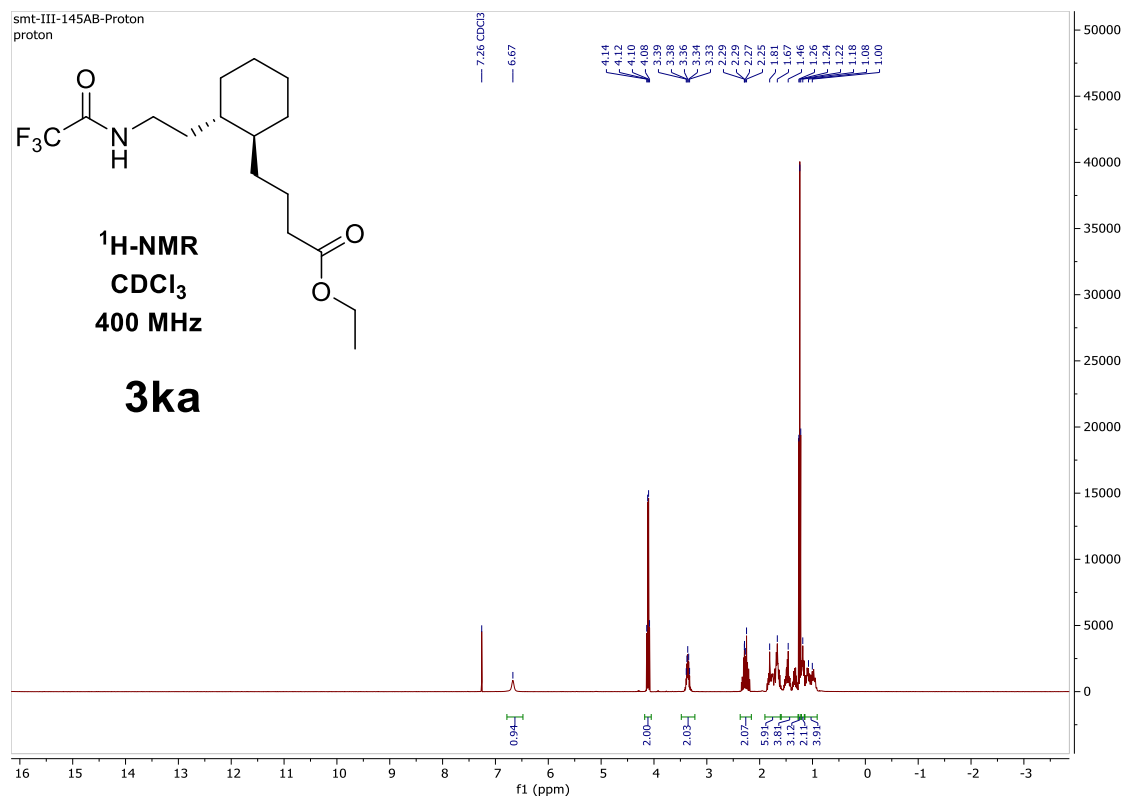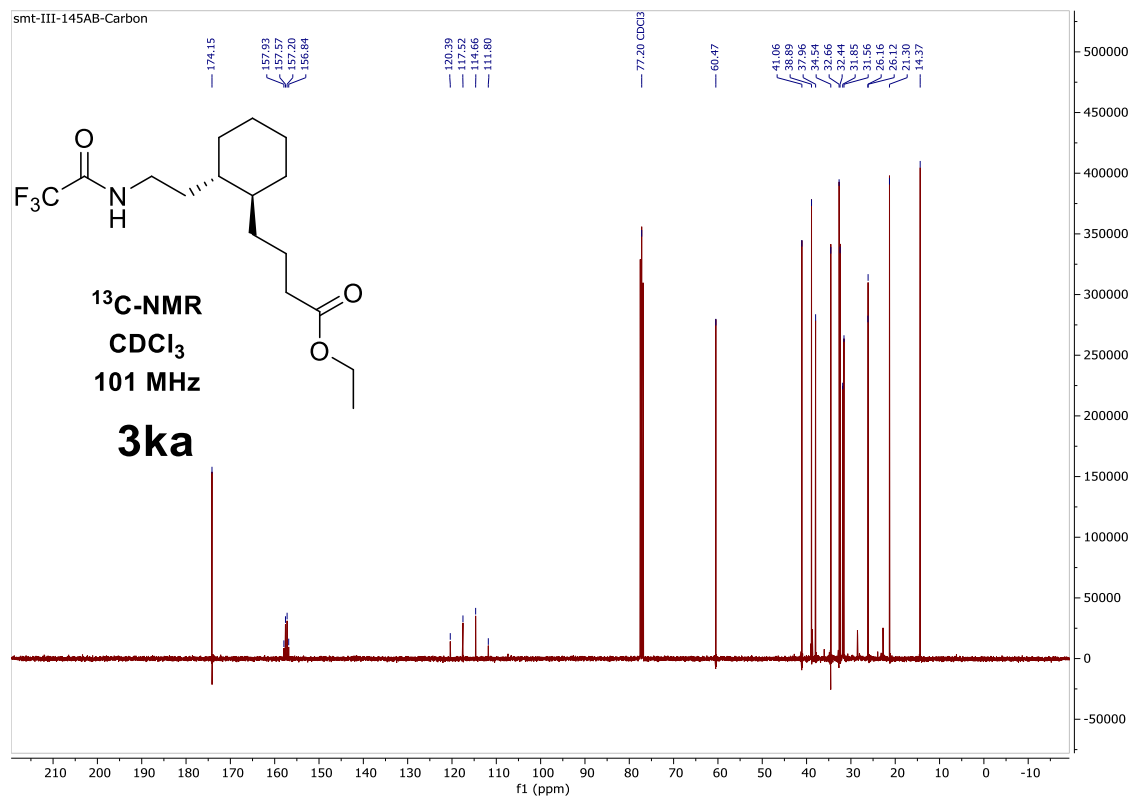

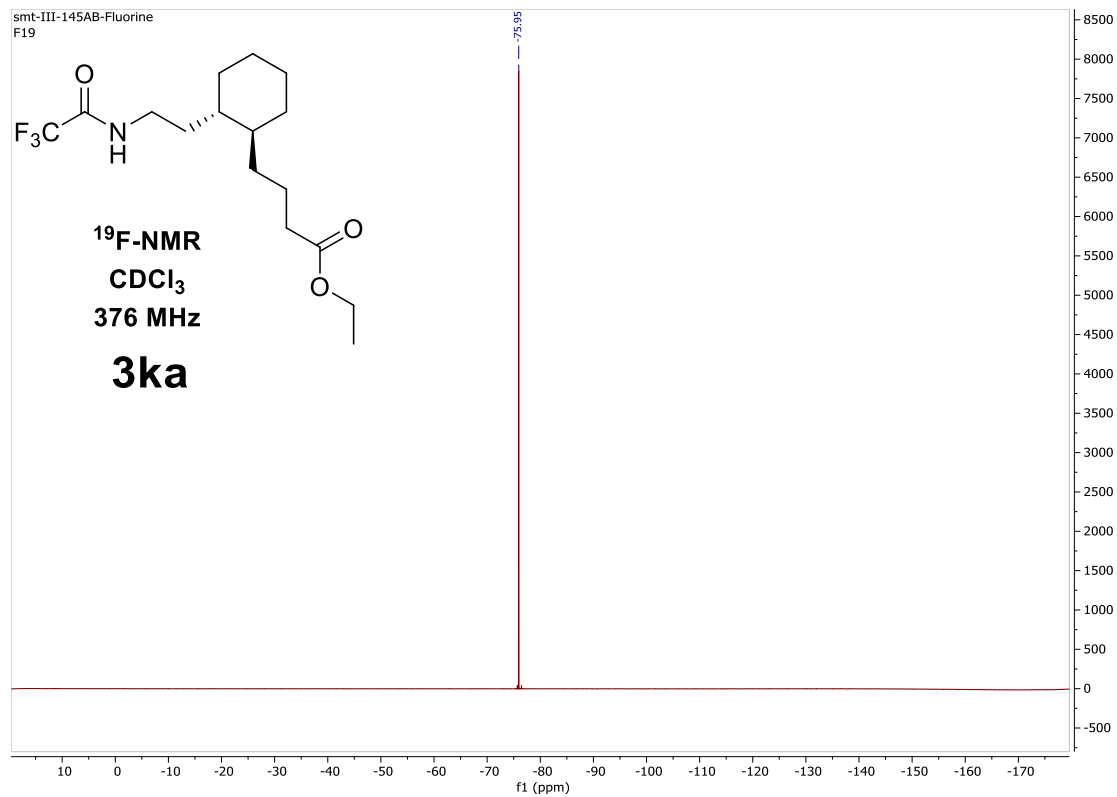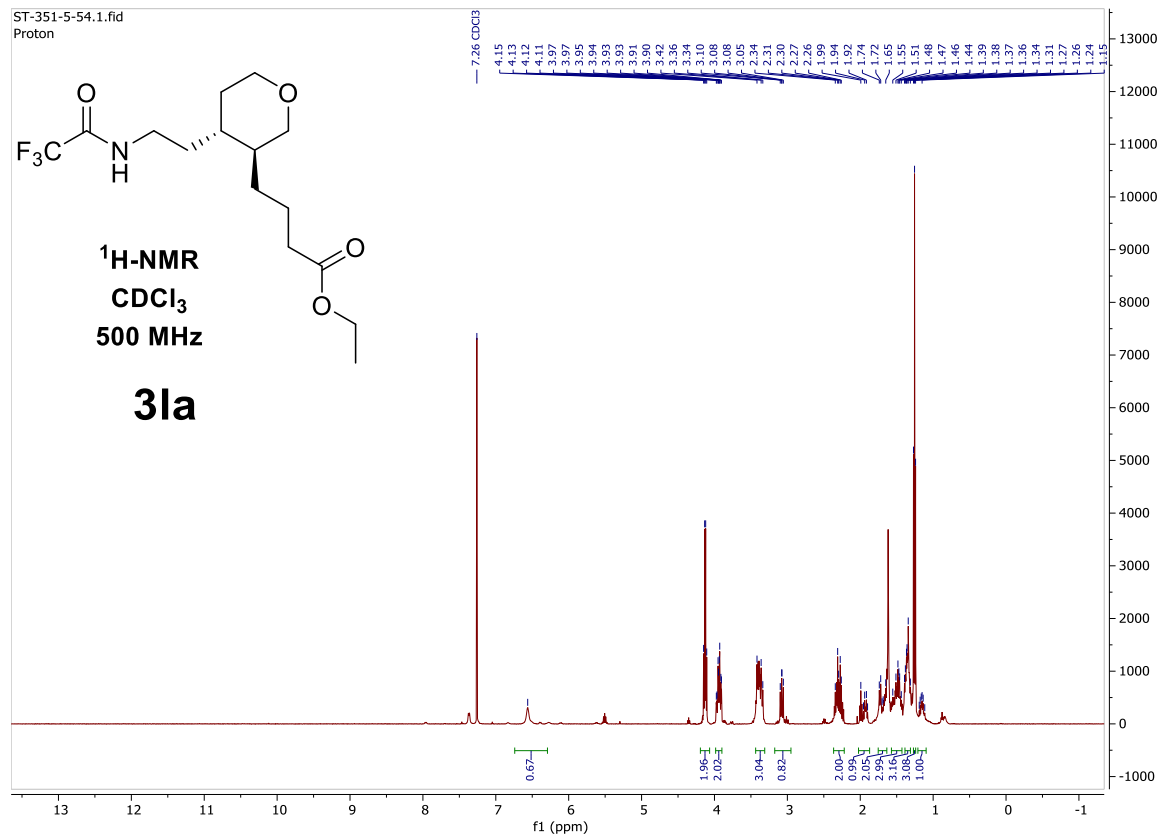

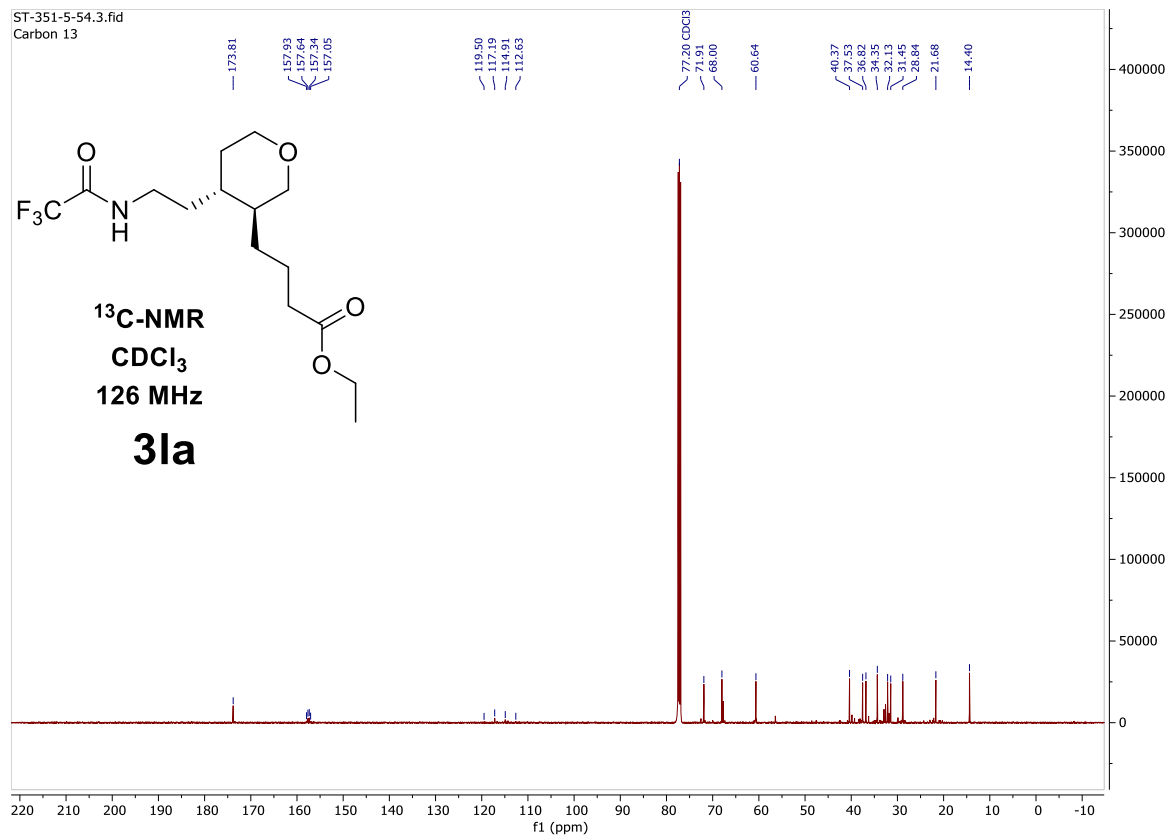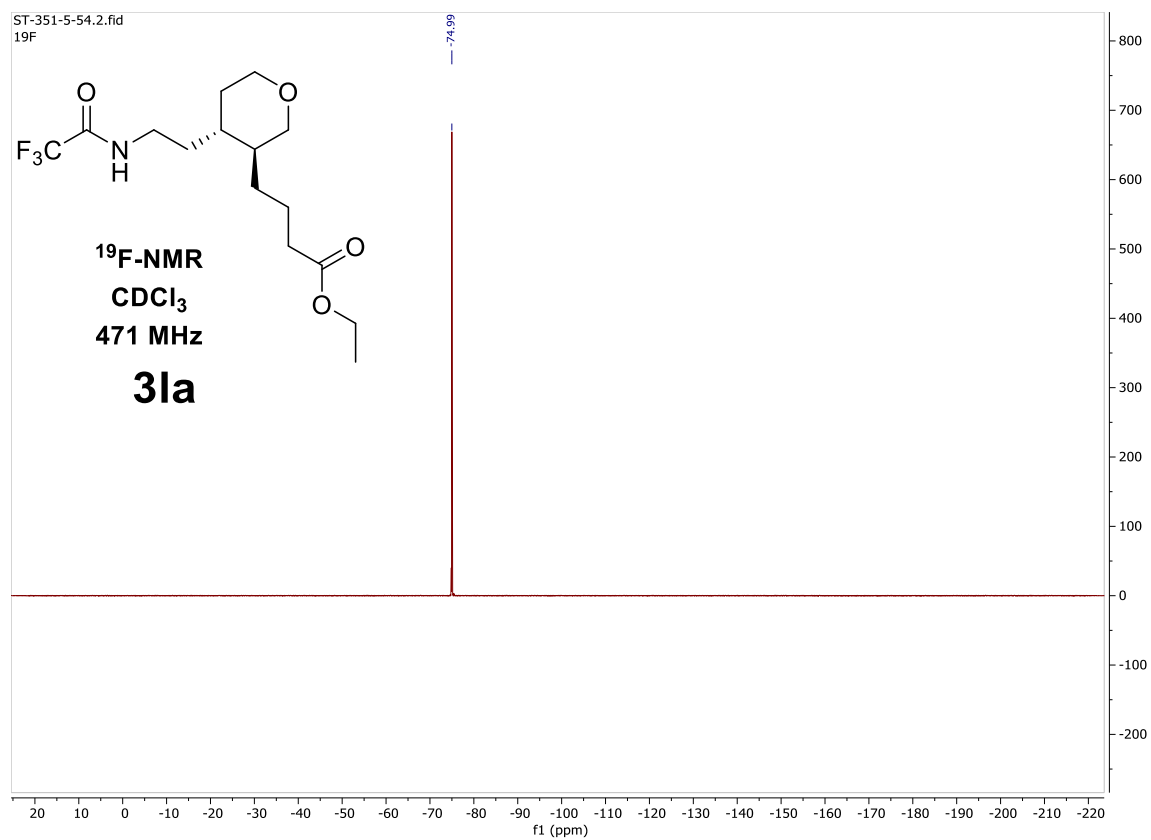

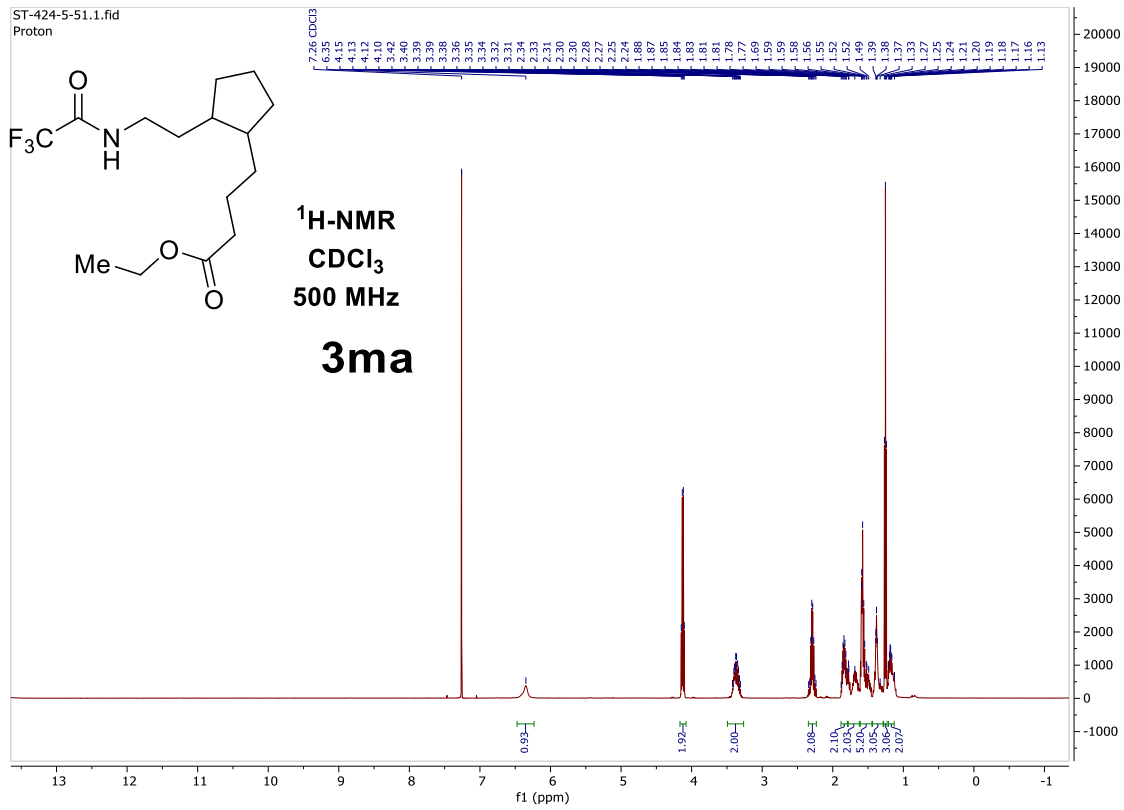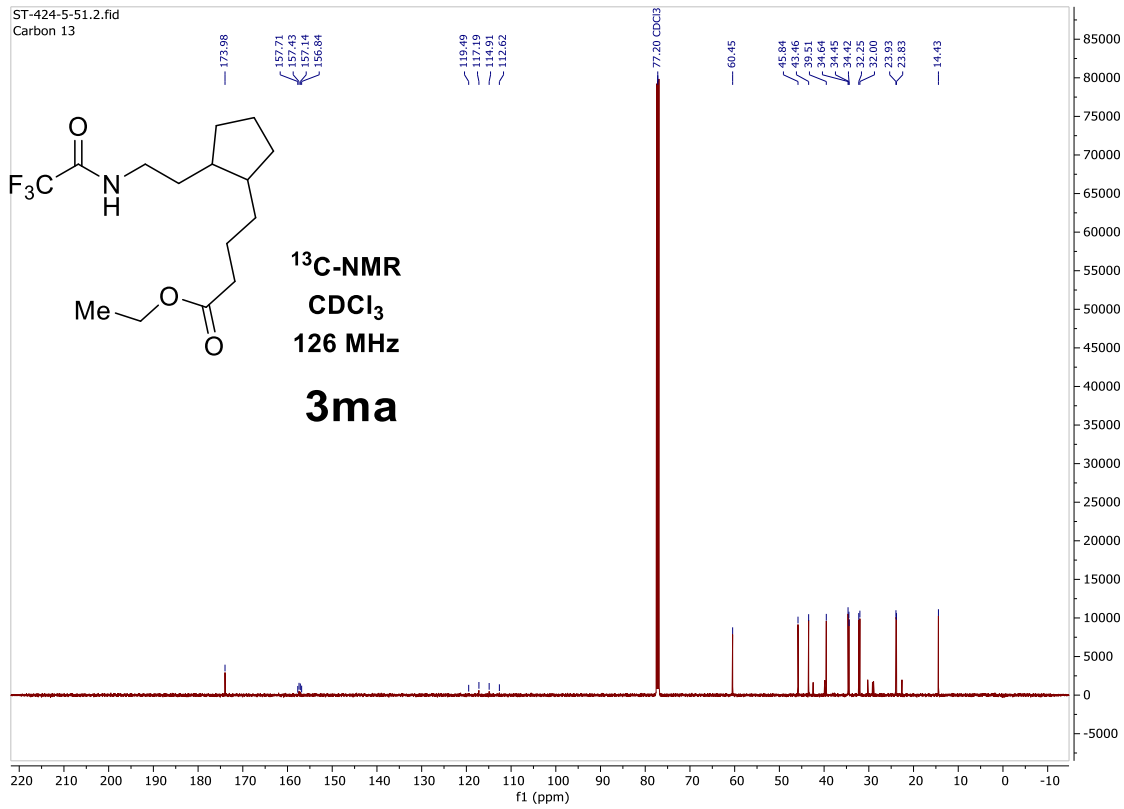

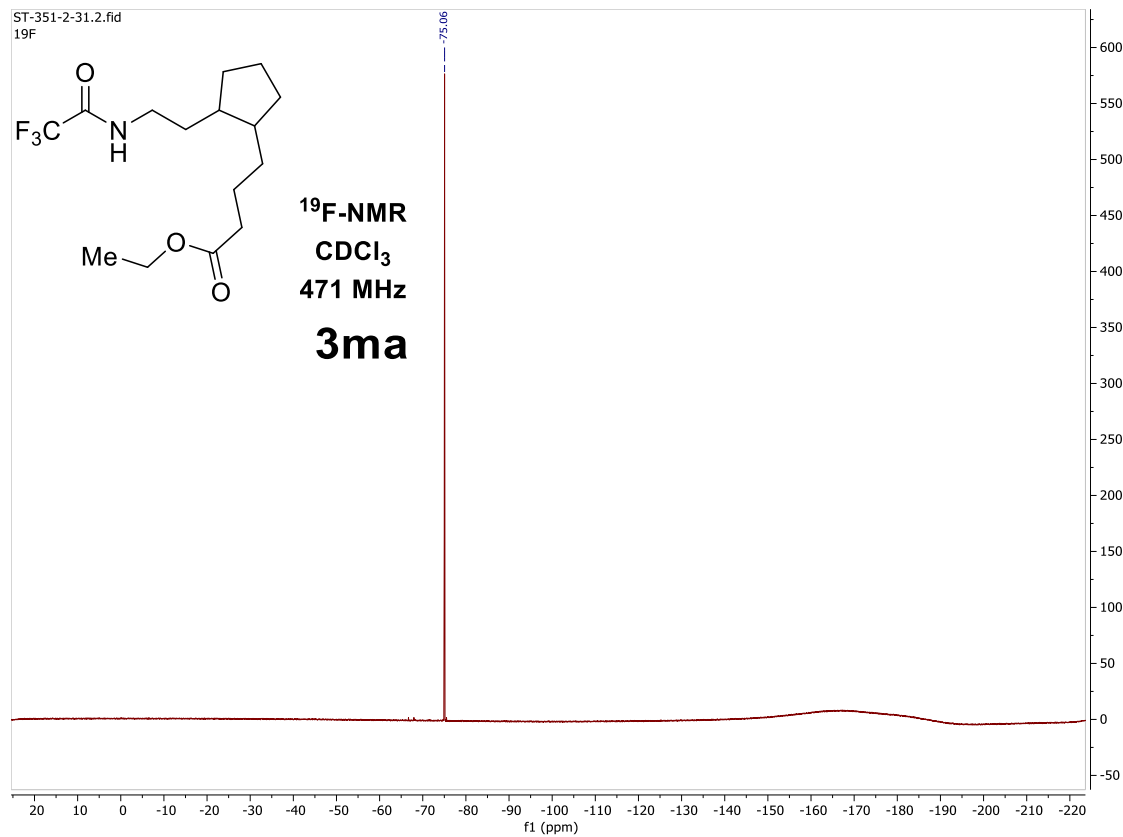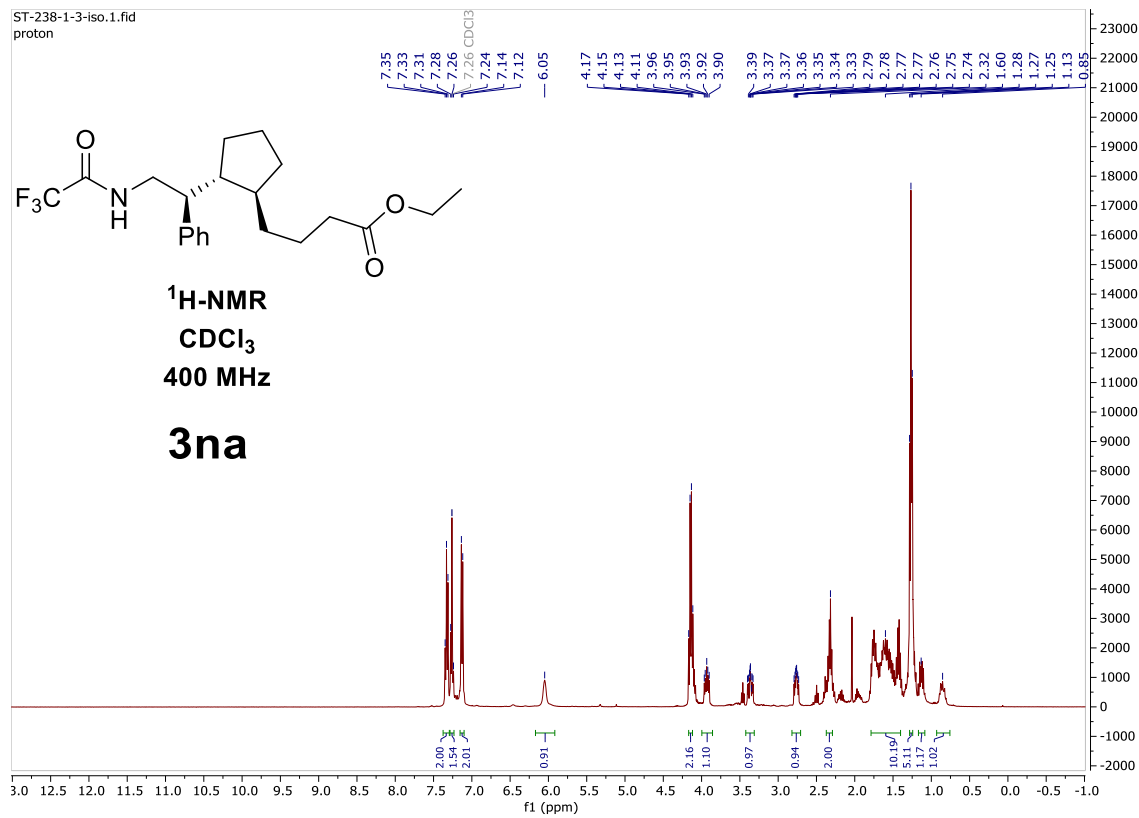

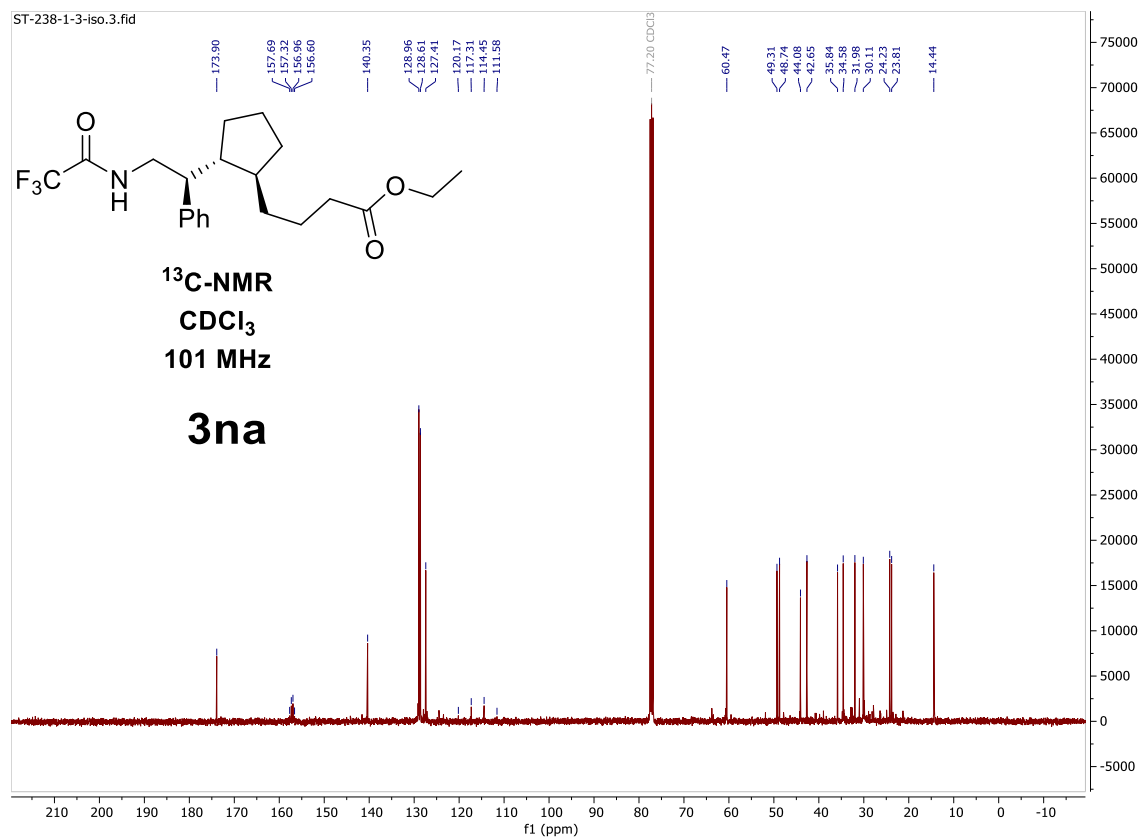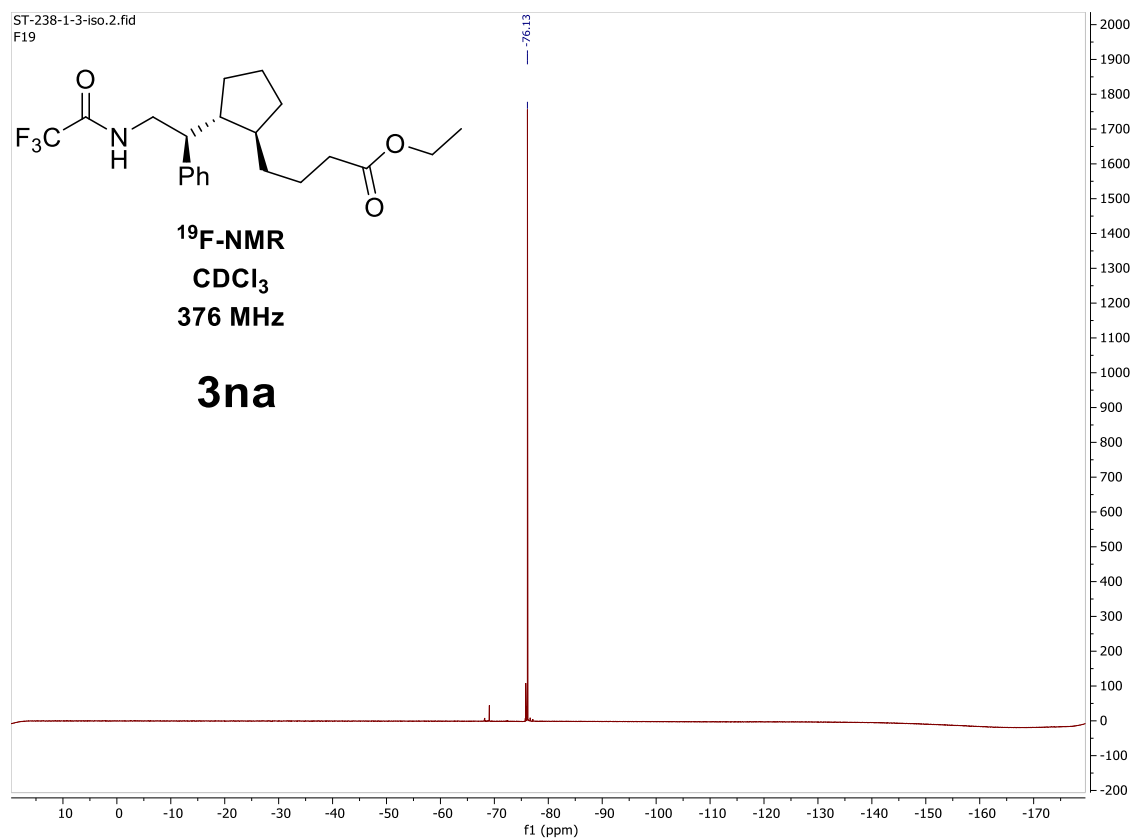

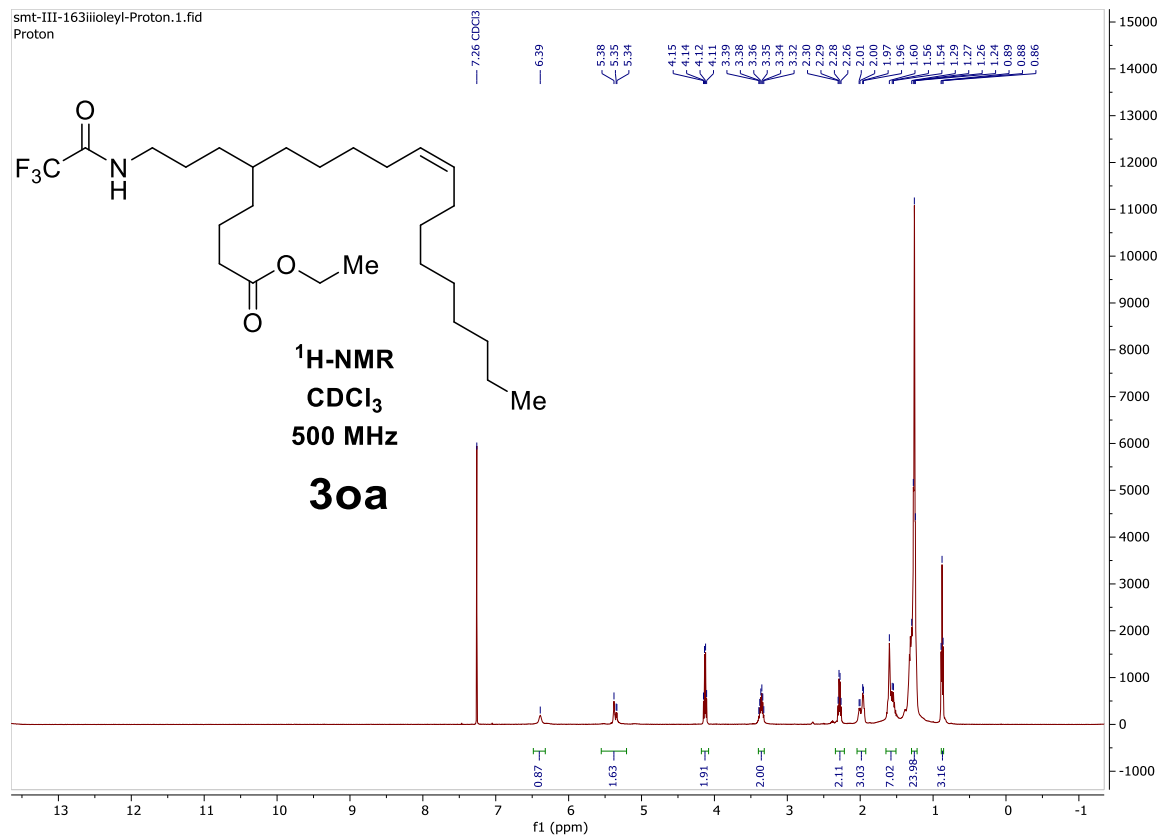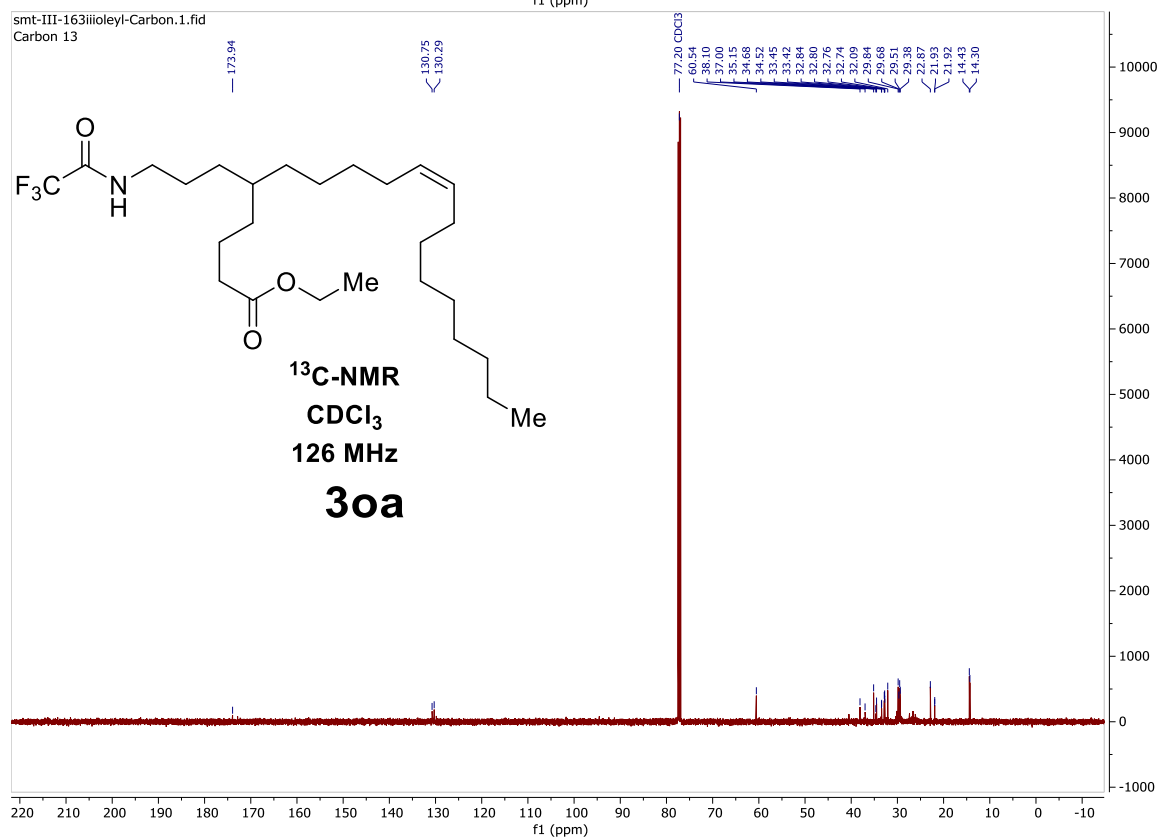



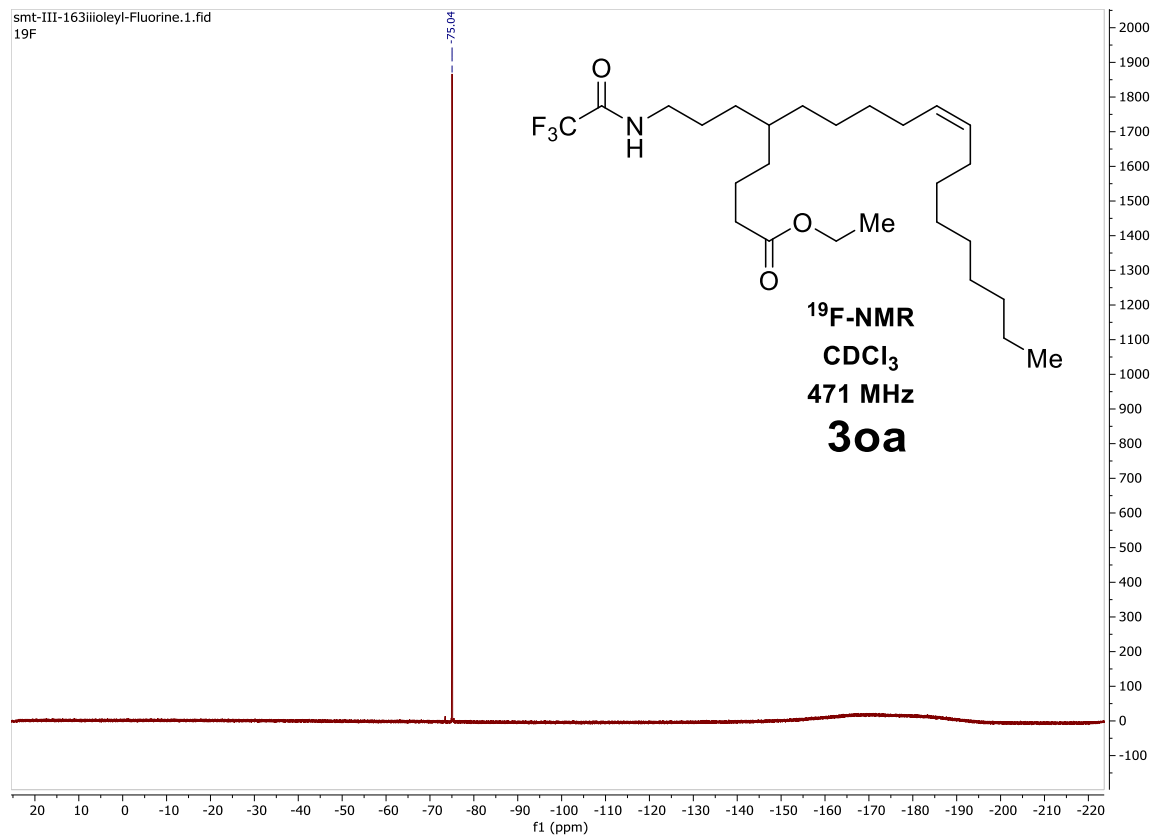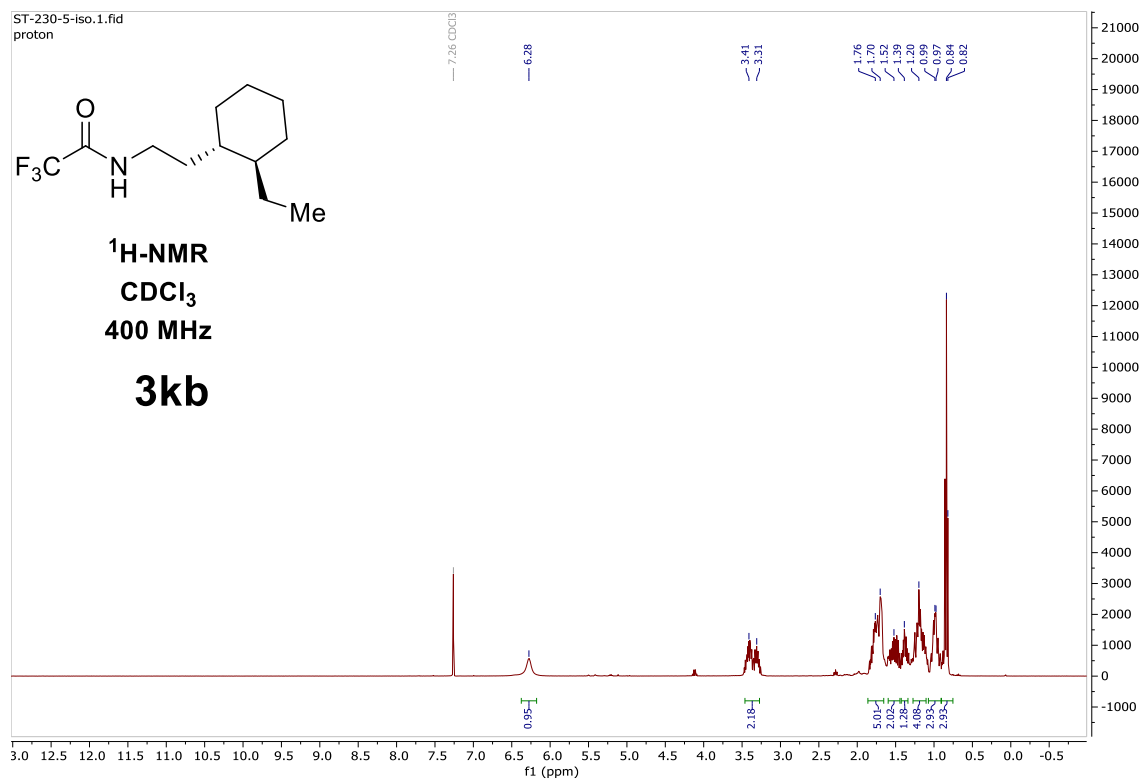

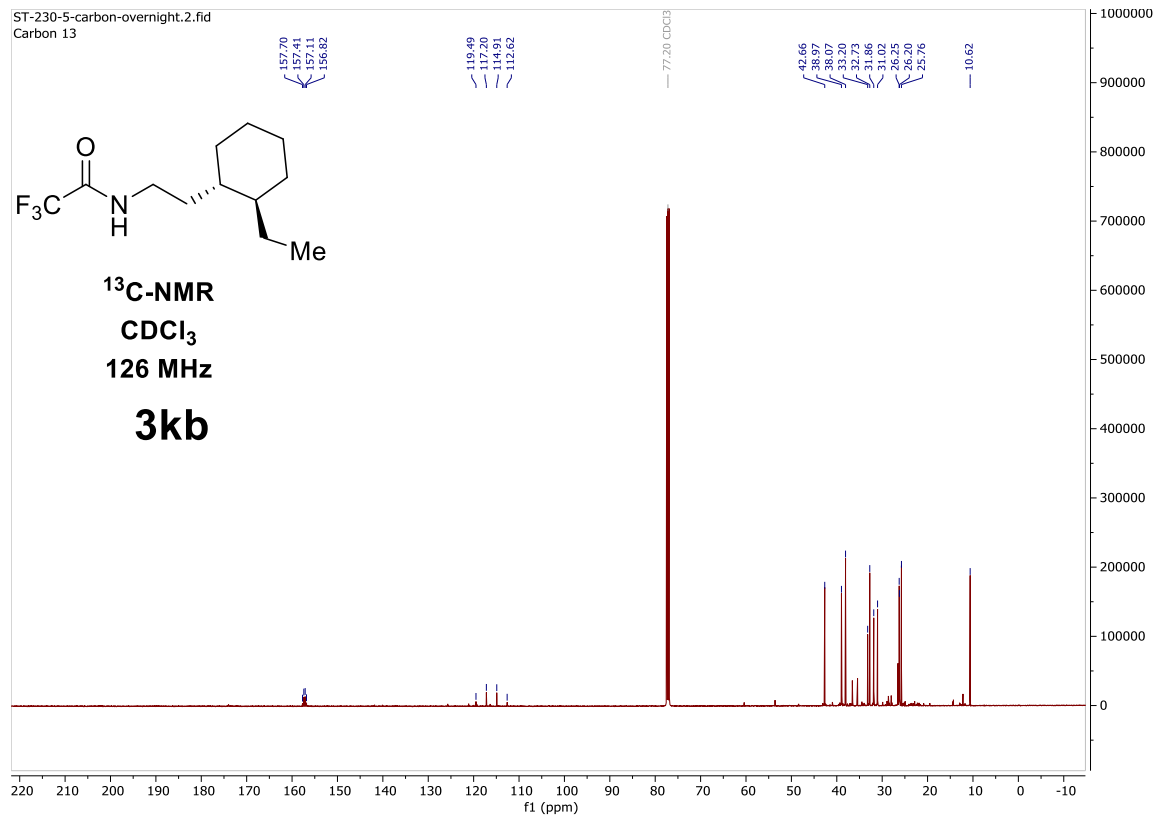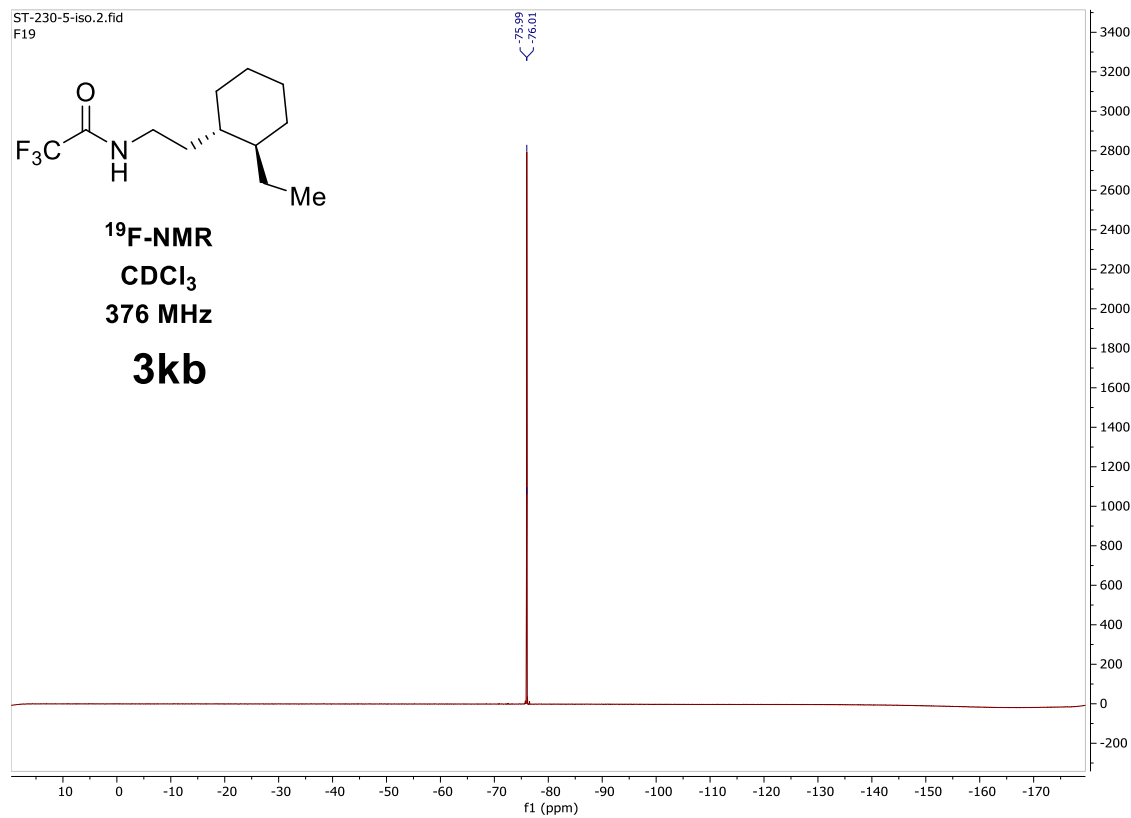

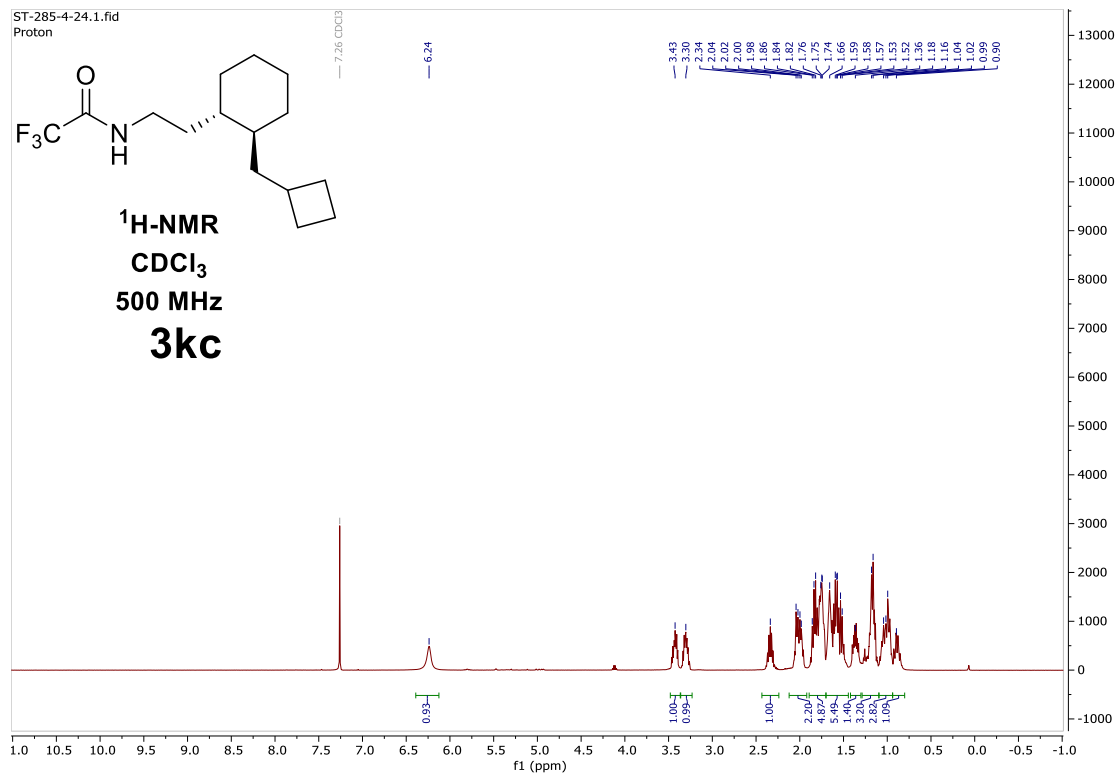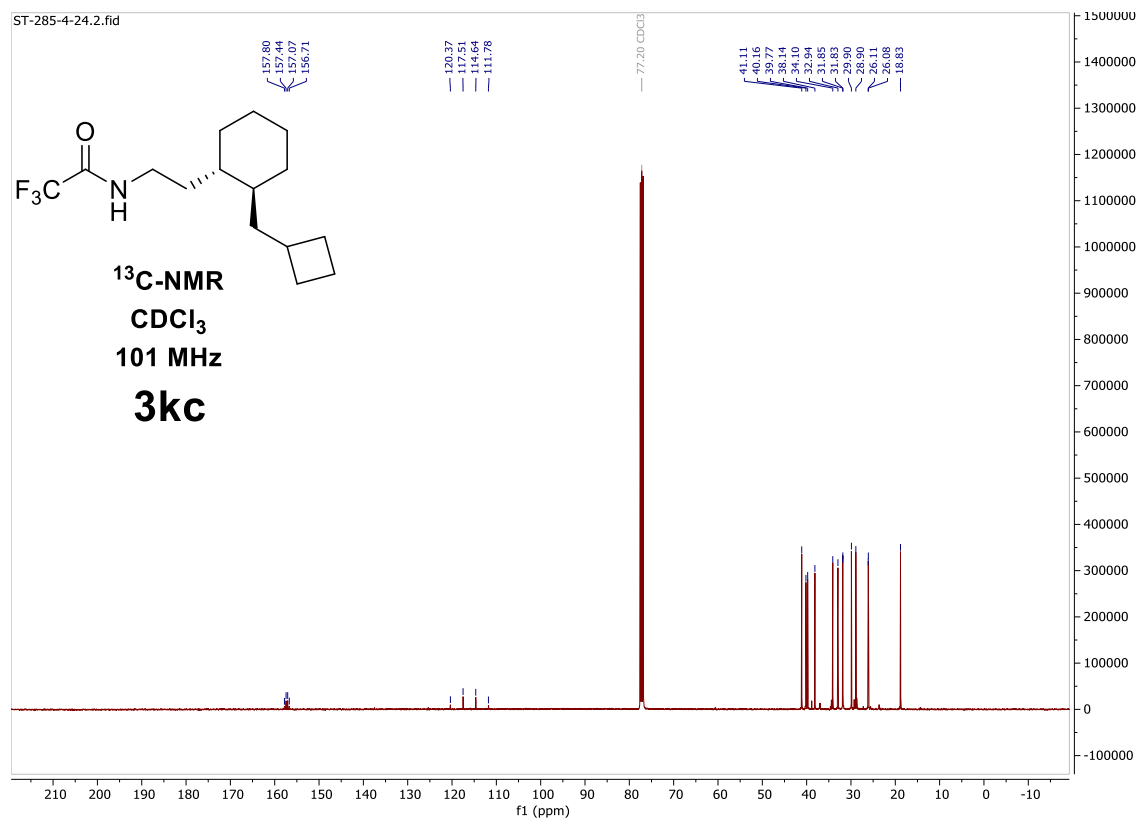

ST-285-4-24.2.fid  
19F

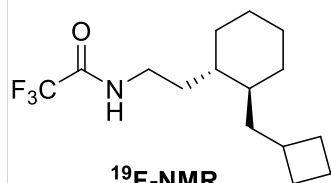

**<sup>19</sup>F-NMR**  
**CDCl<sub>3</sub>**  
**471 MHz**

**3kc**

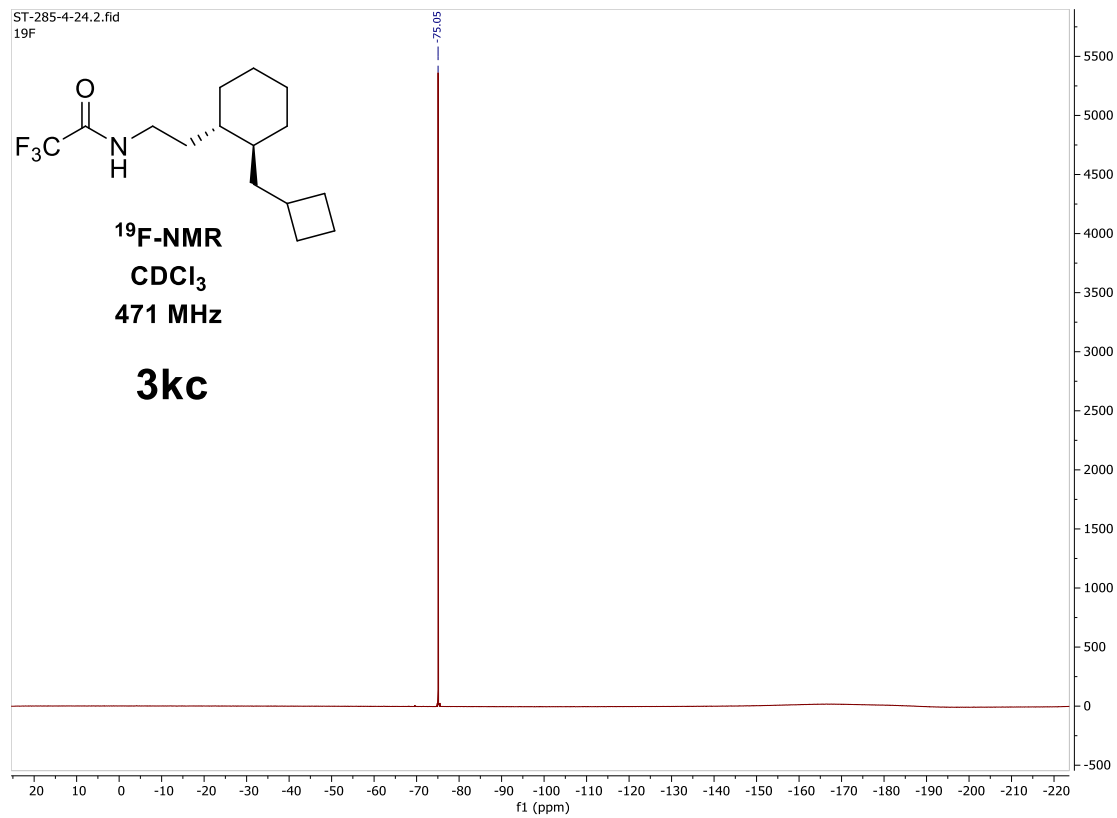

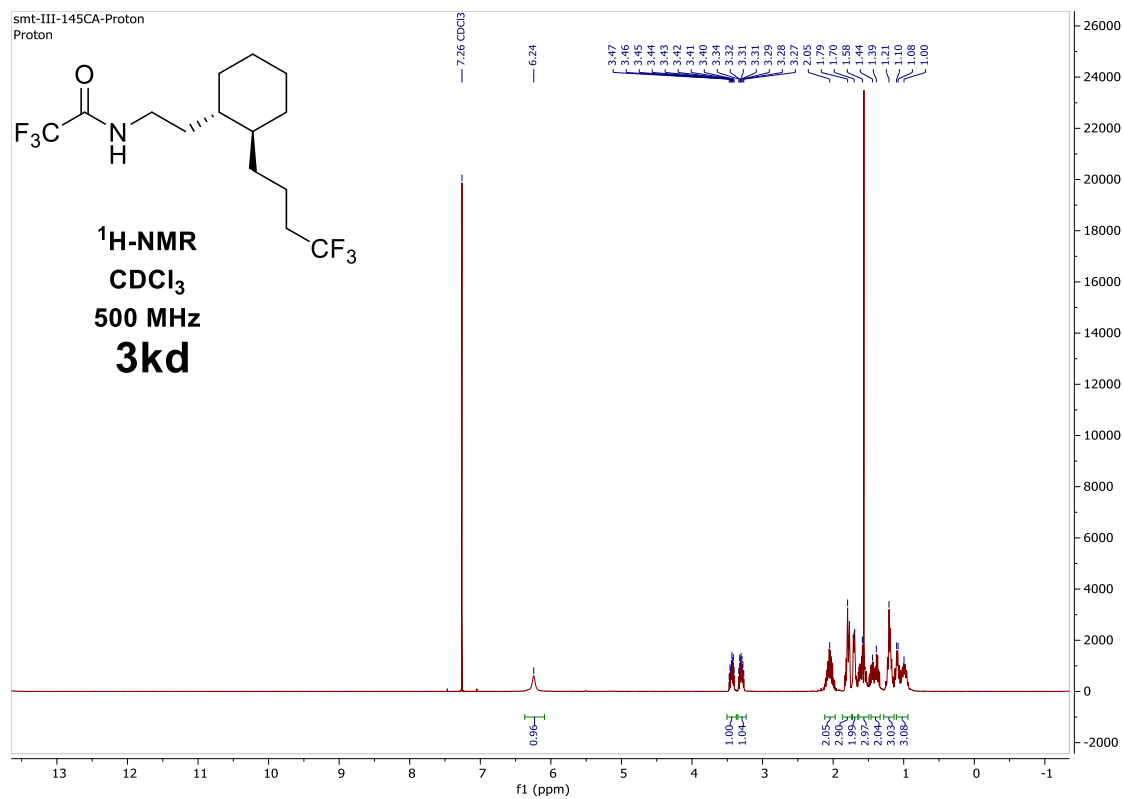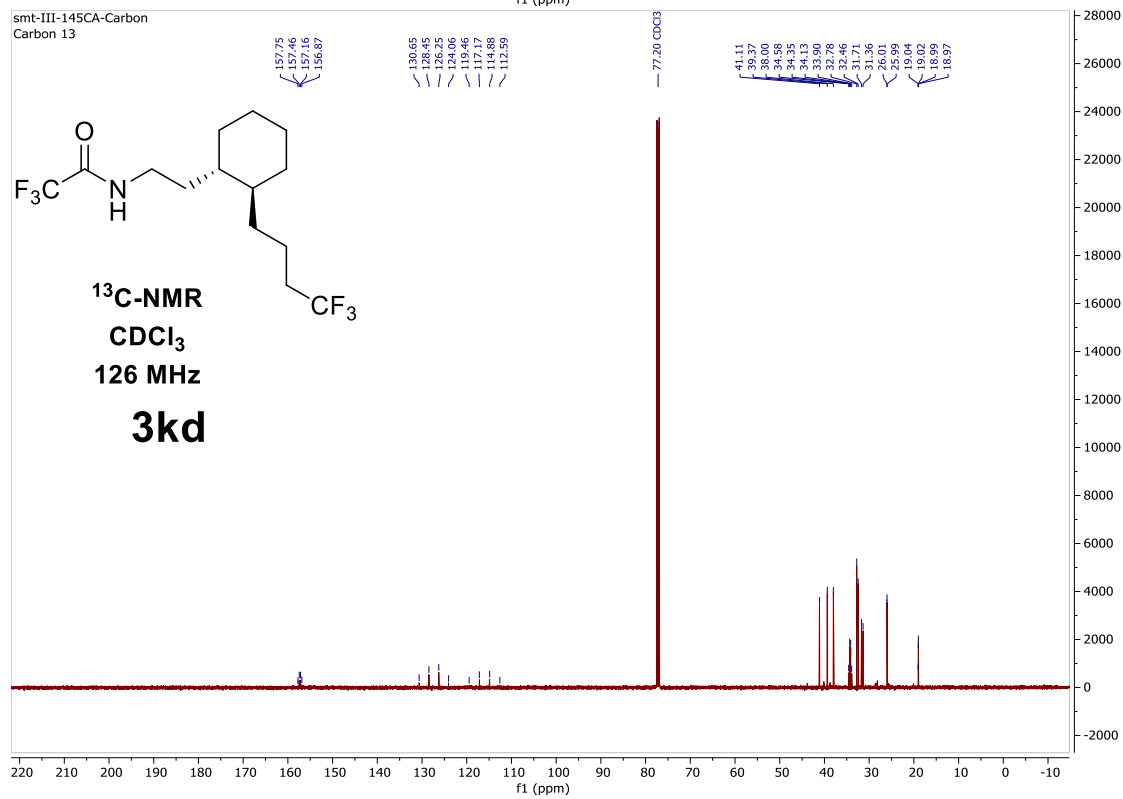

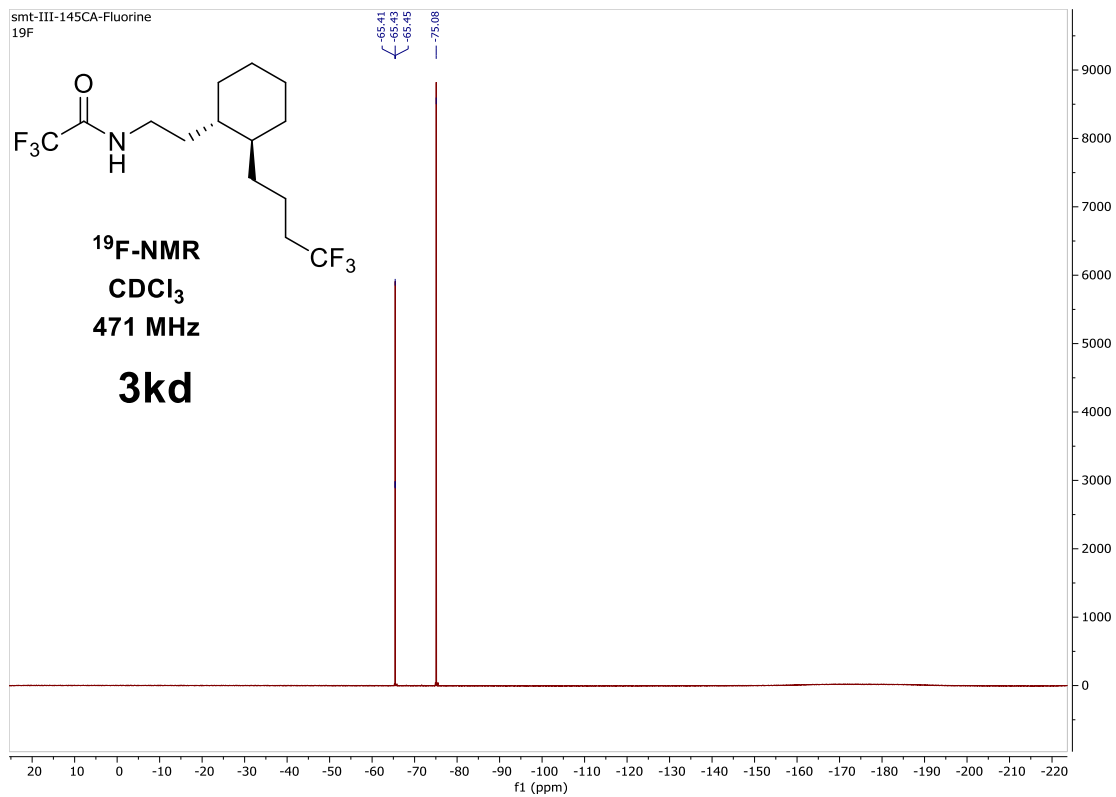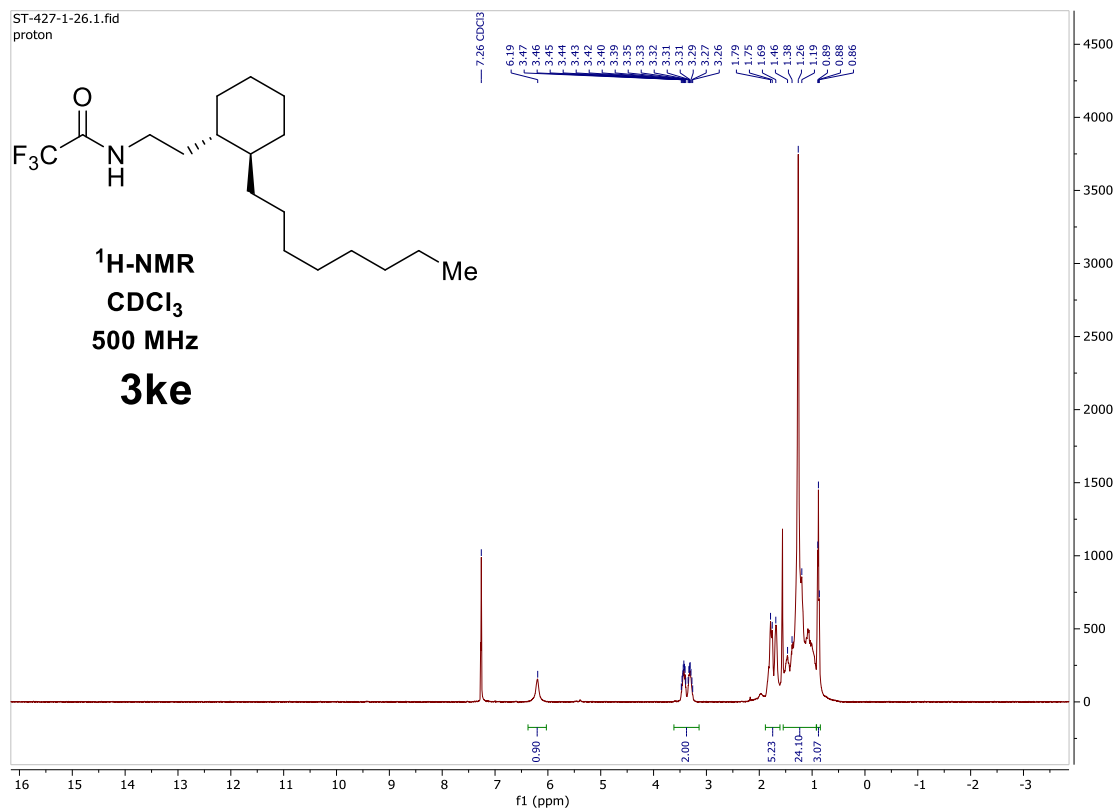

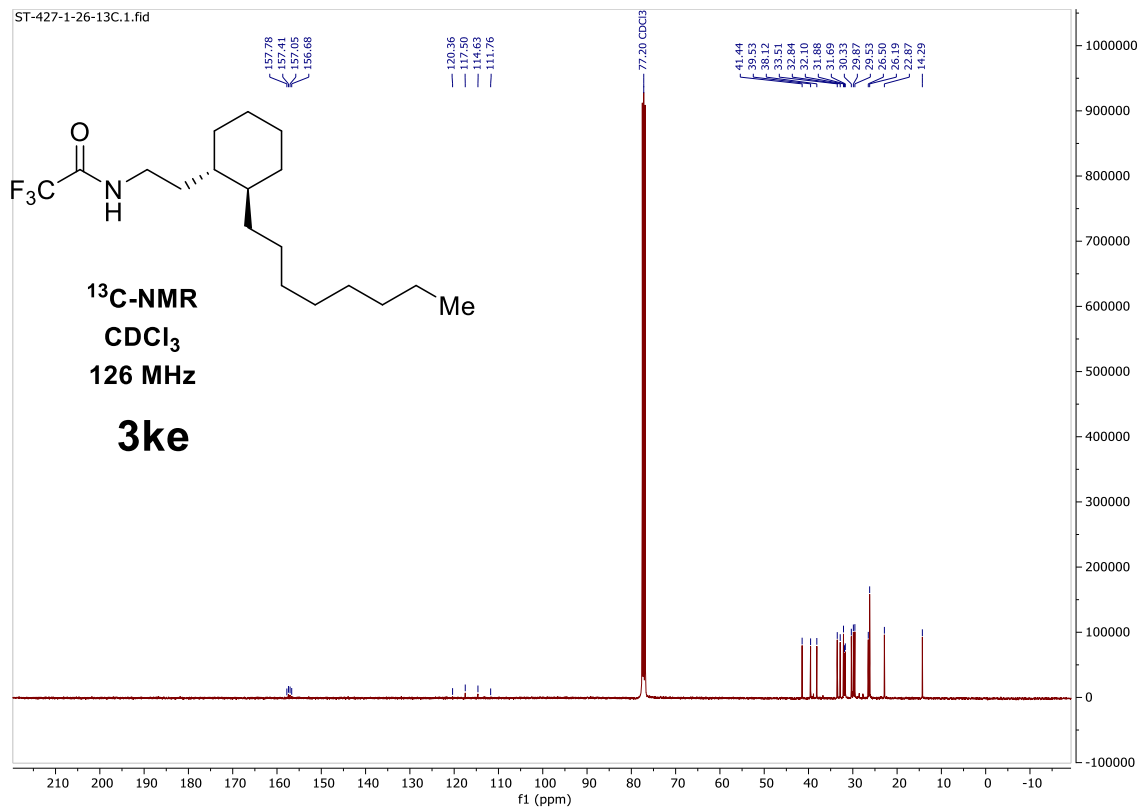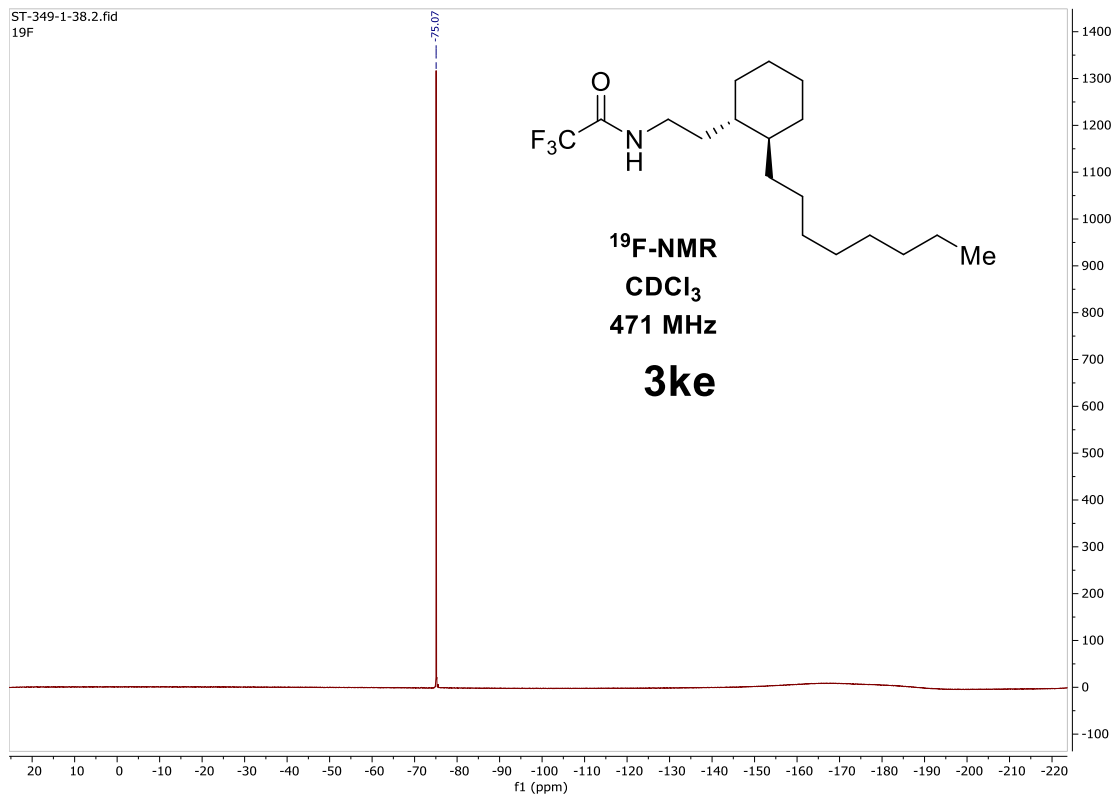

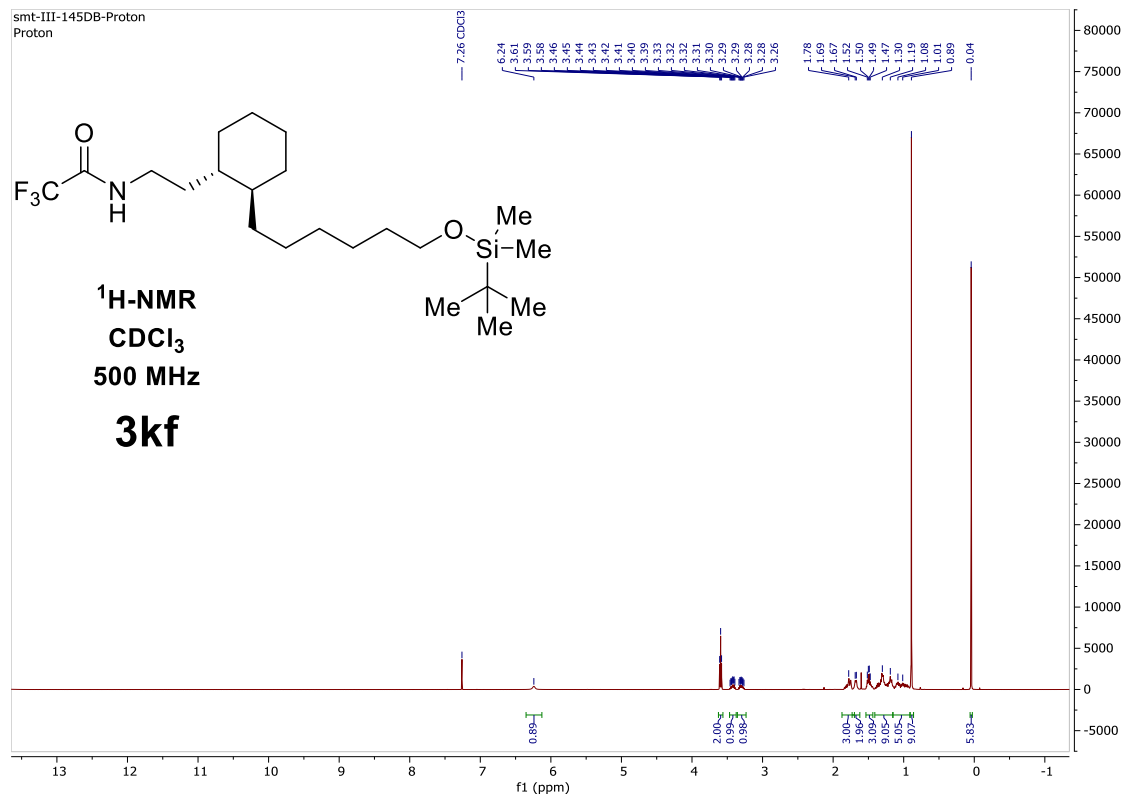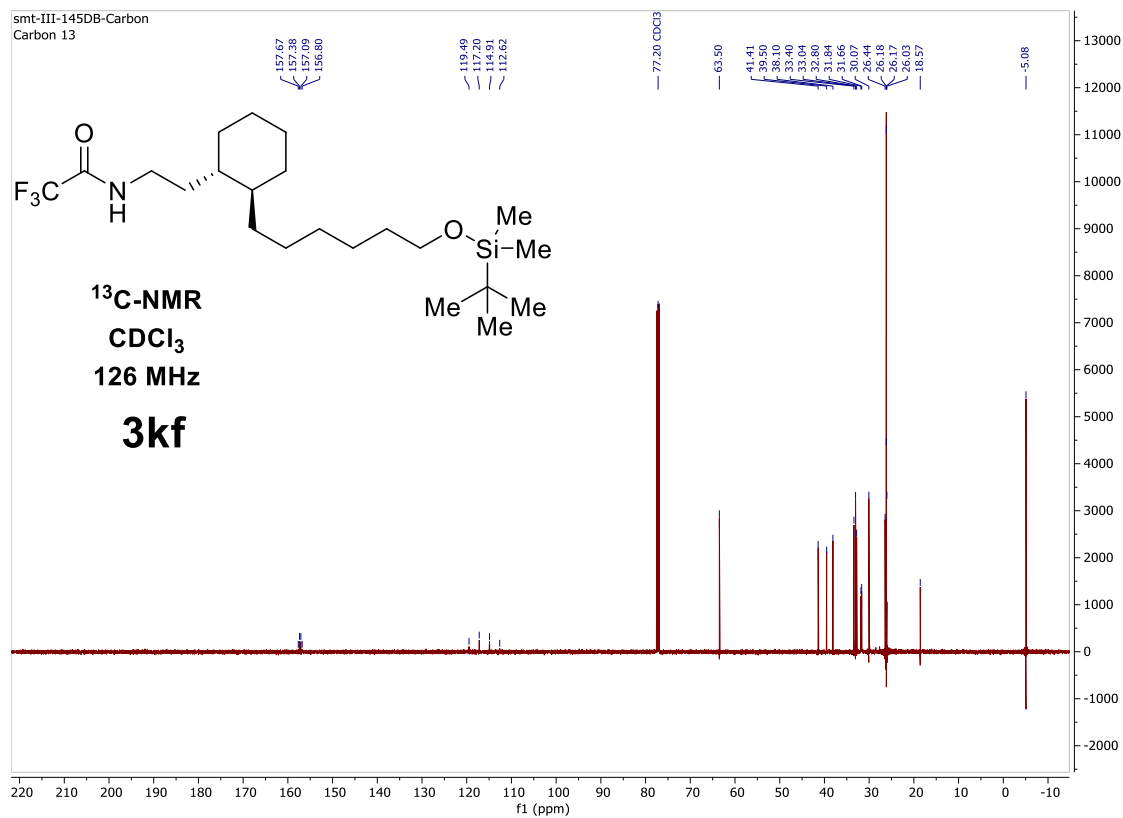



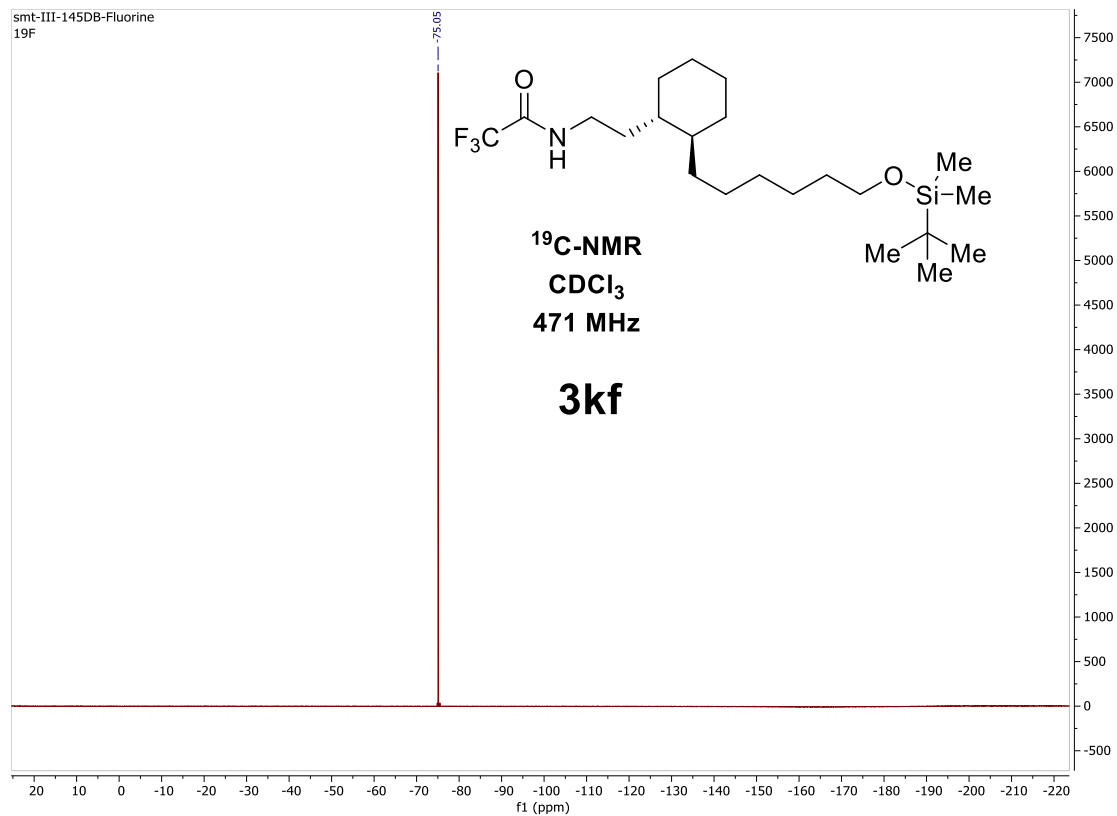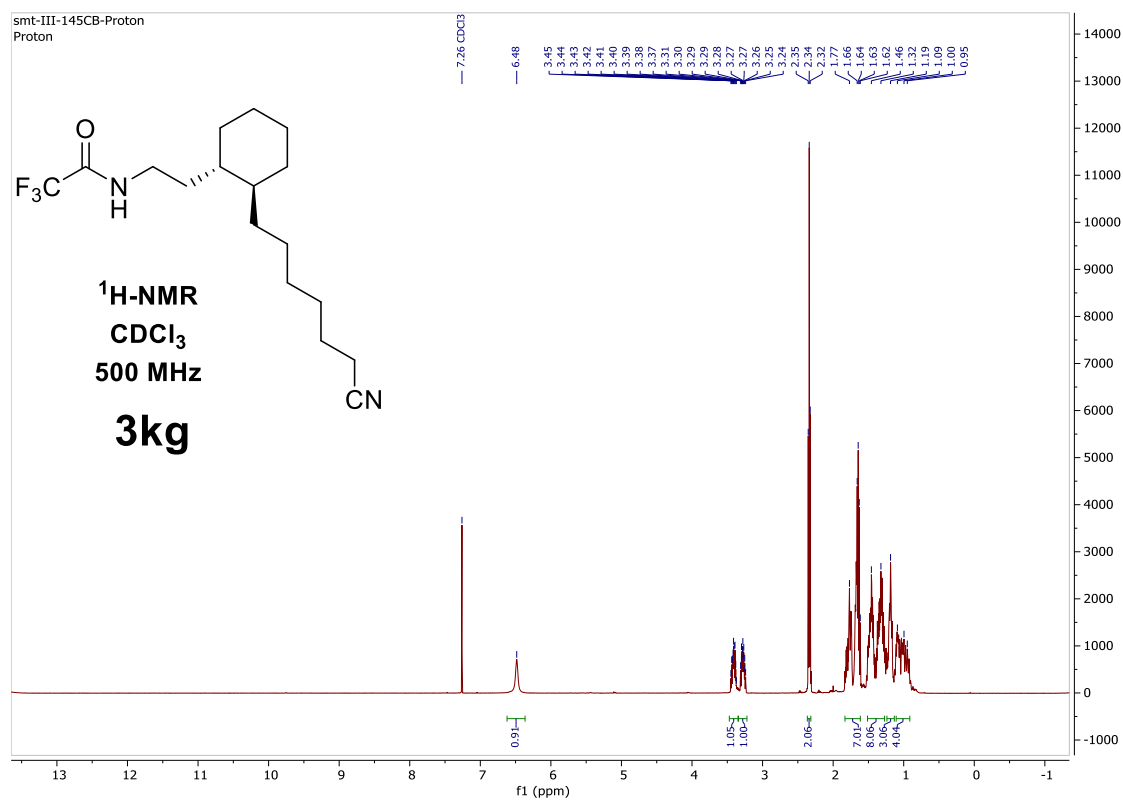

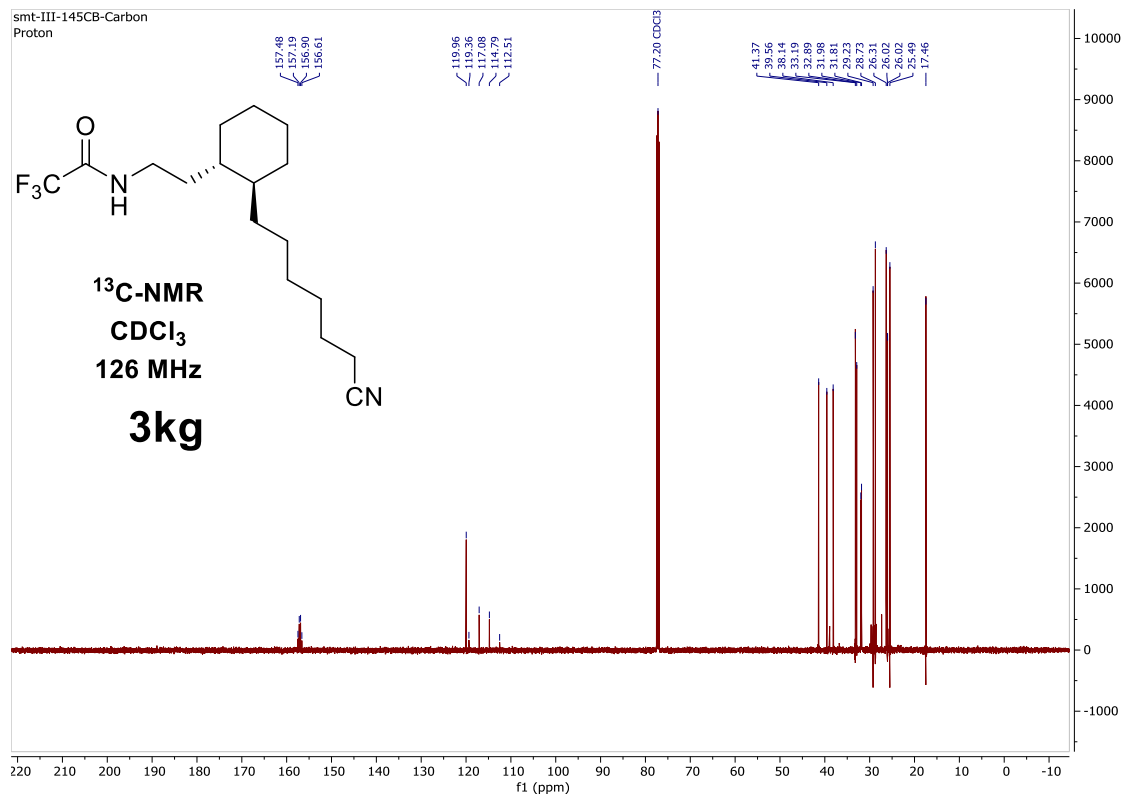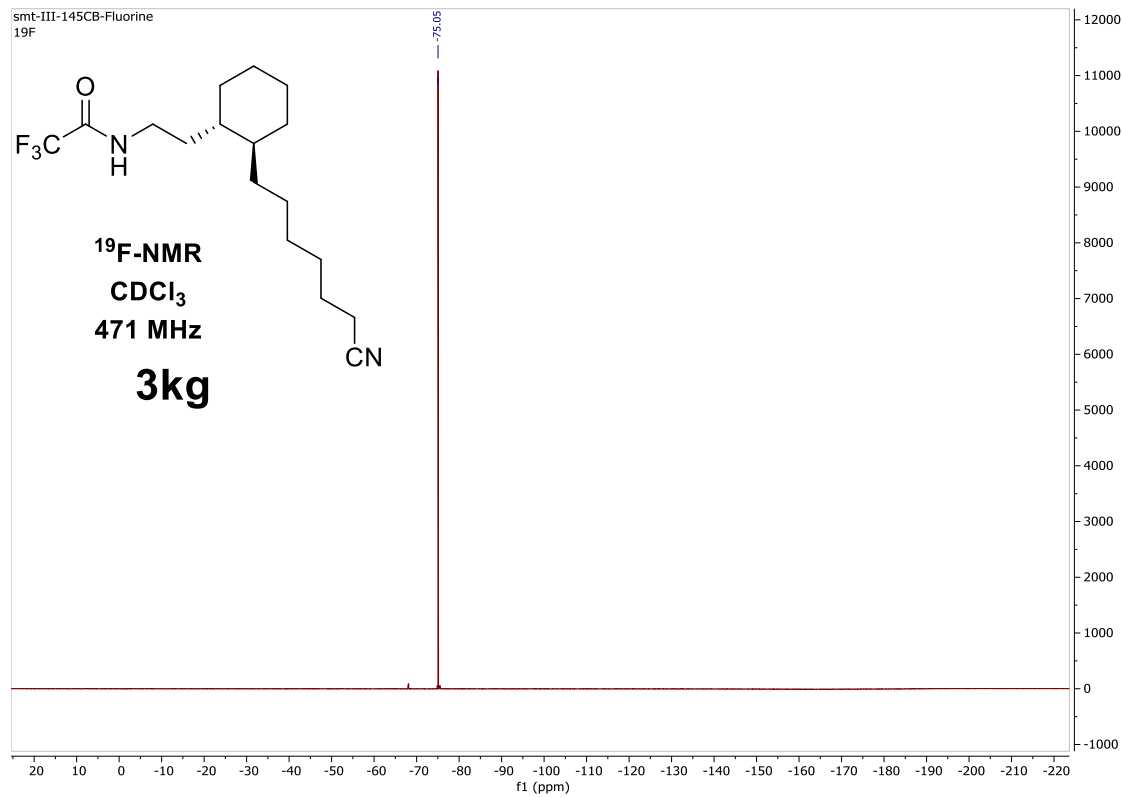

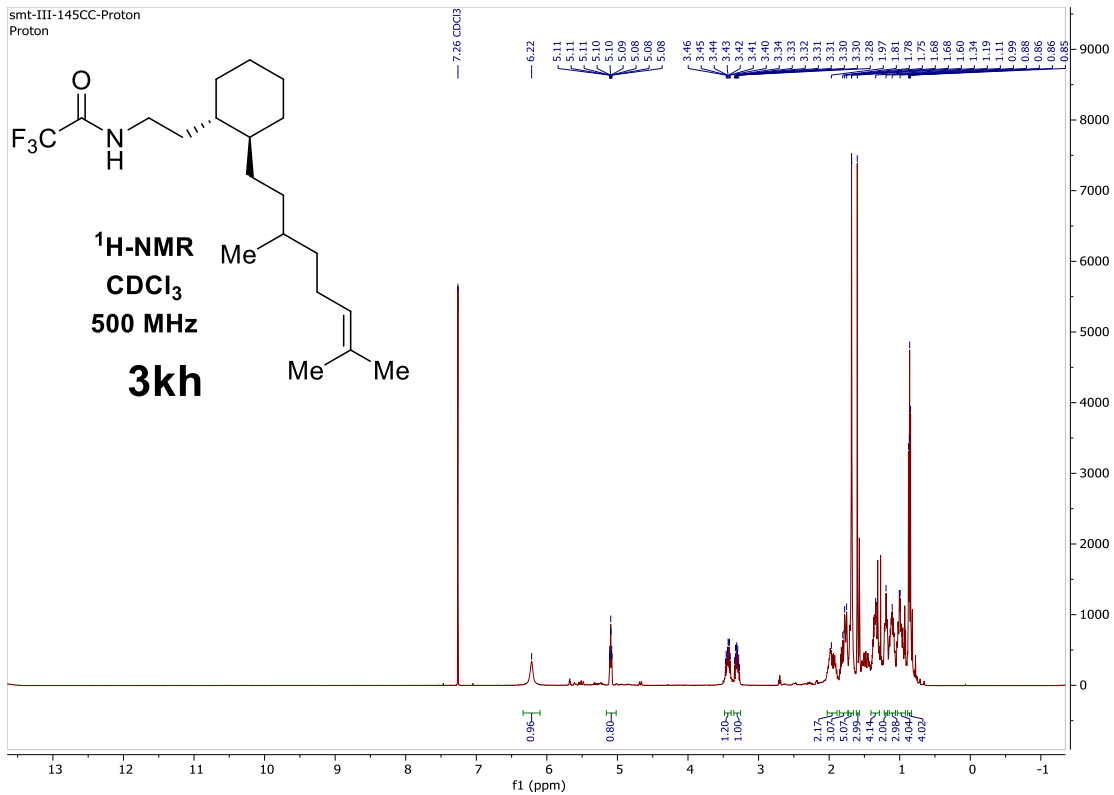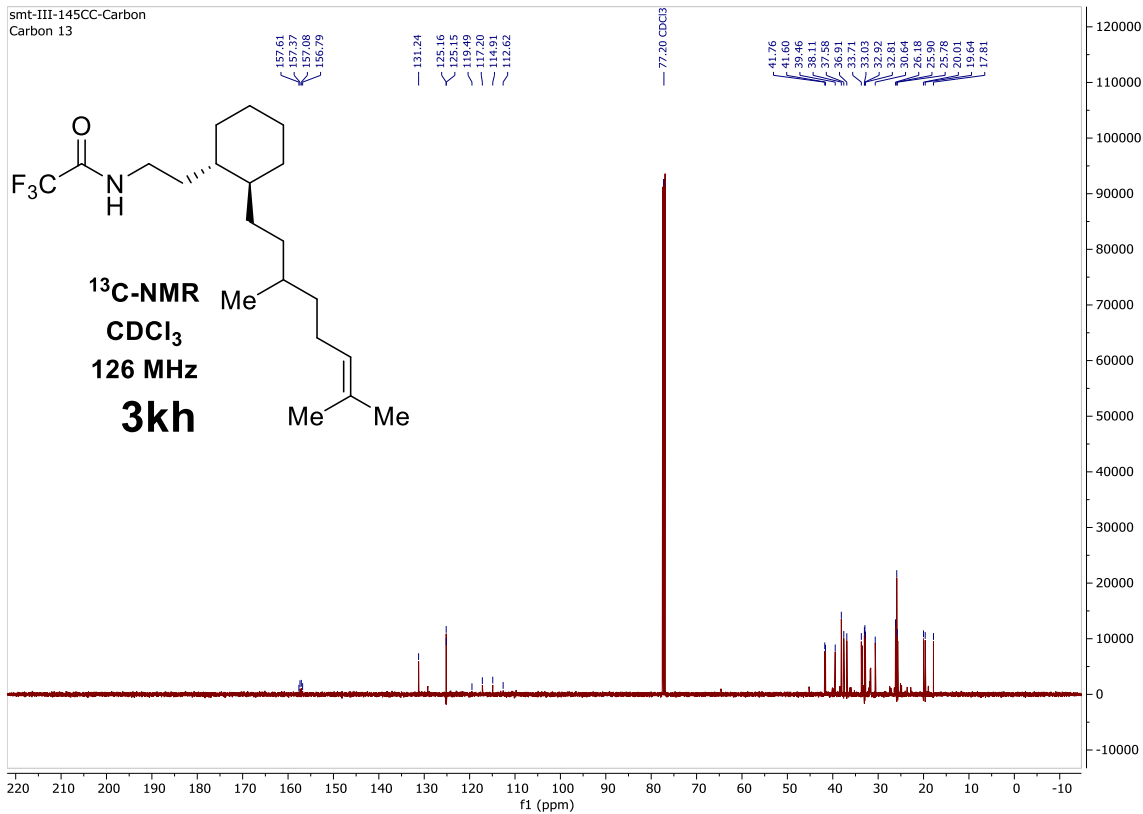

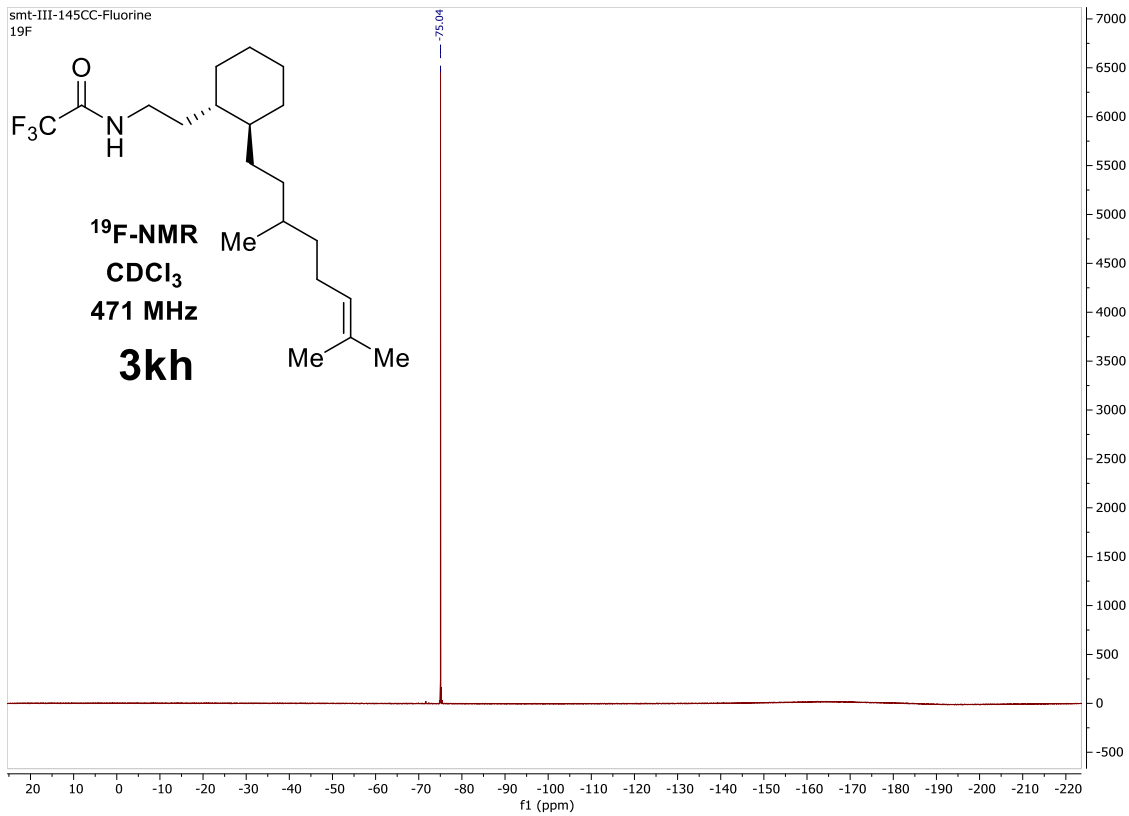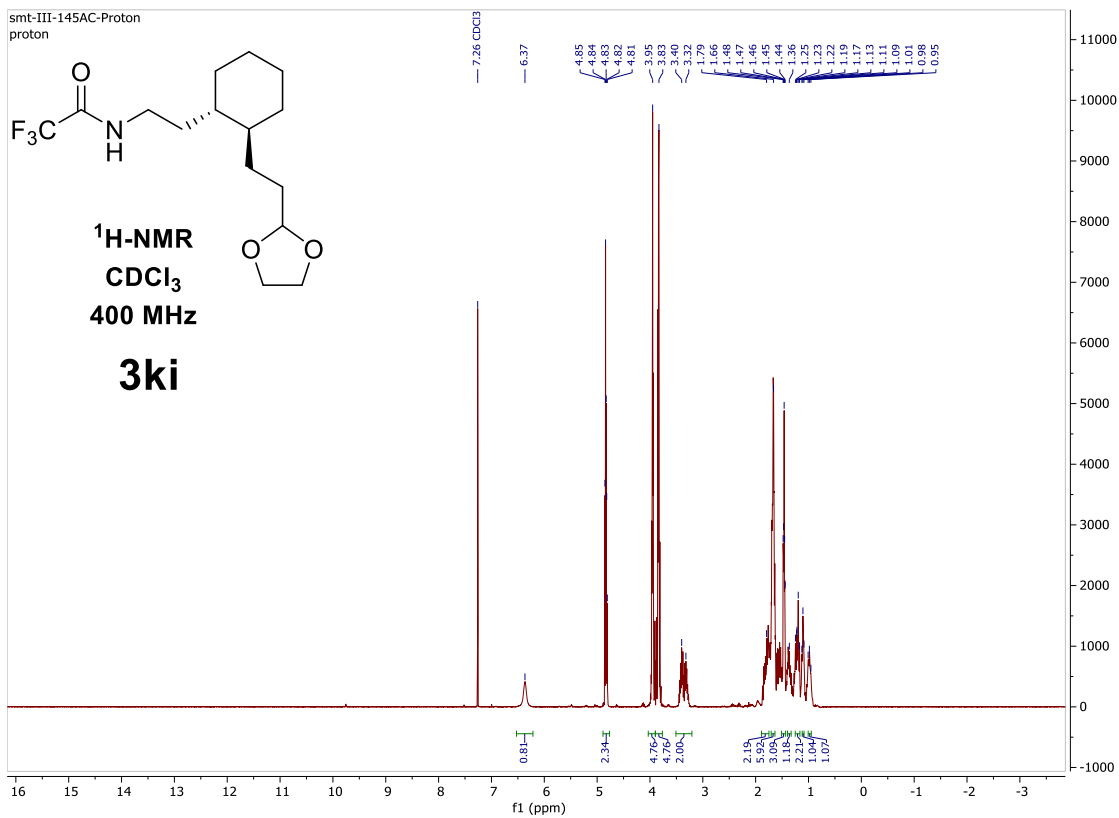

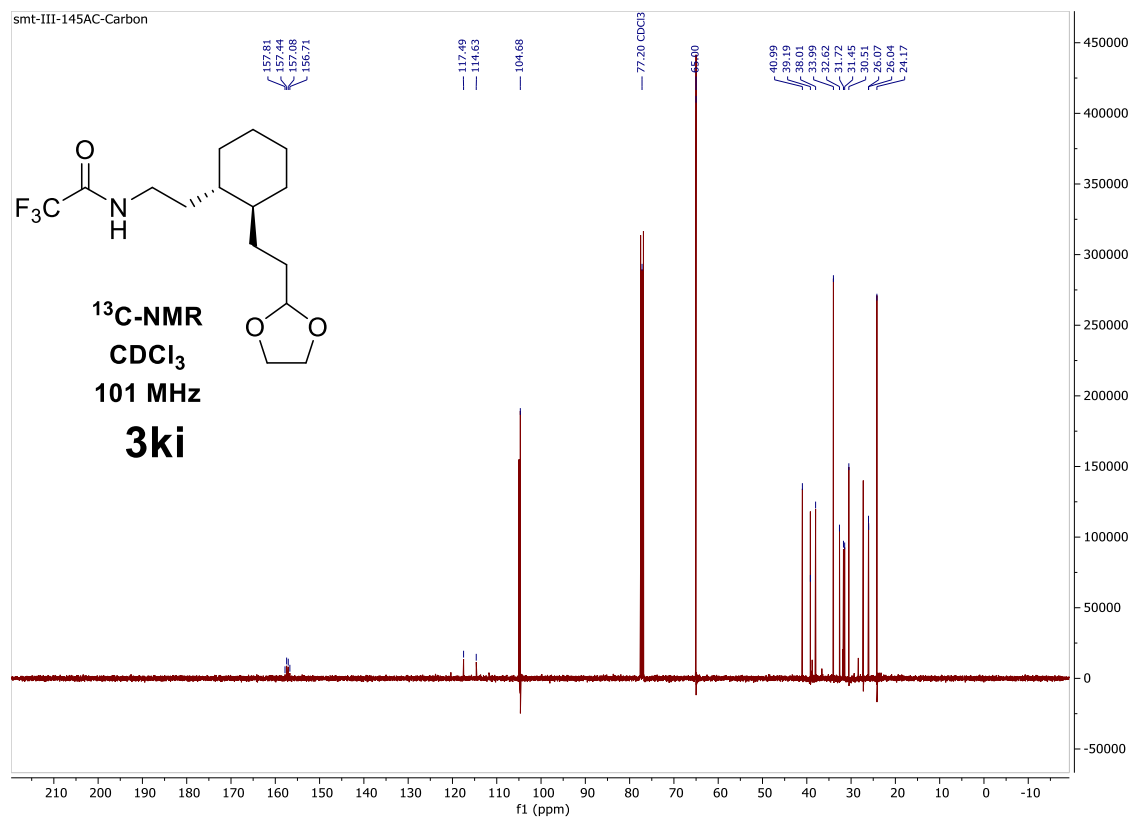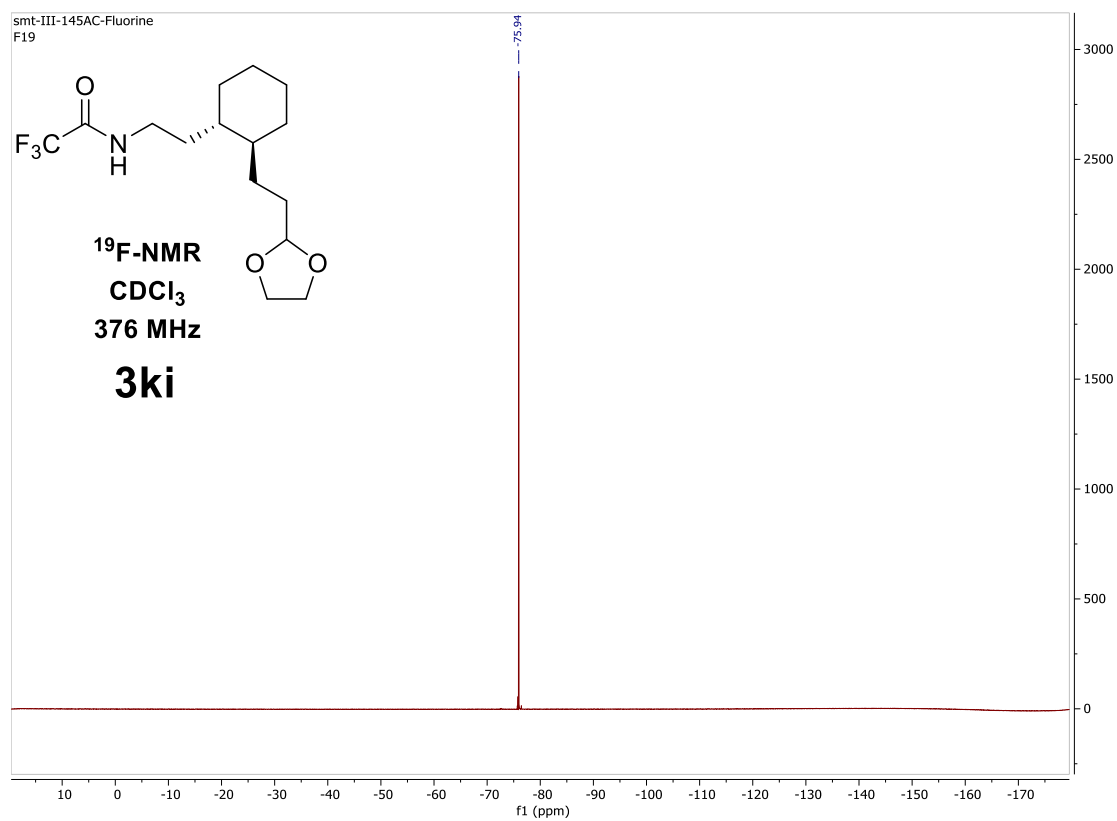

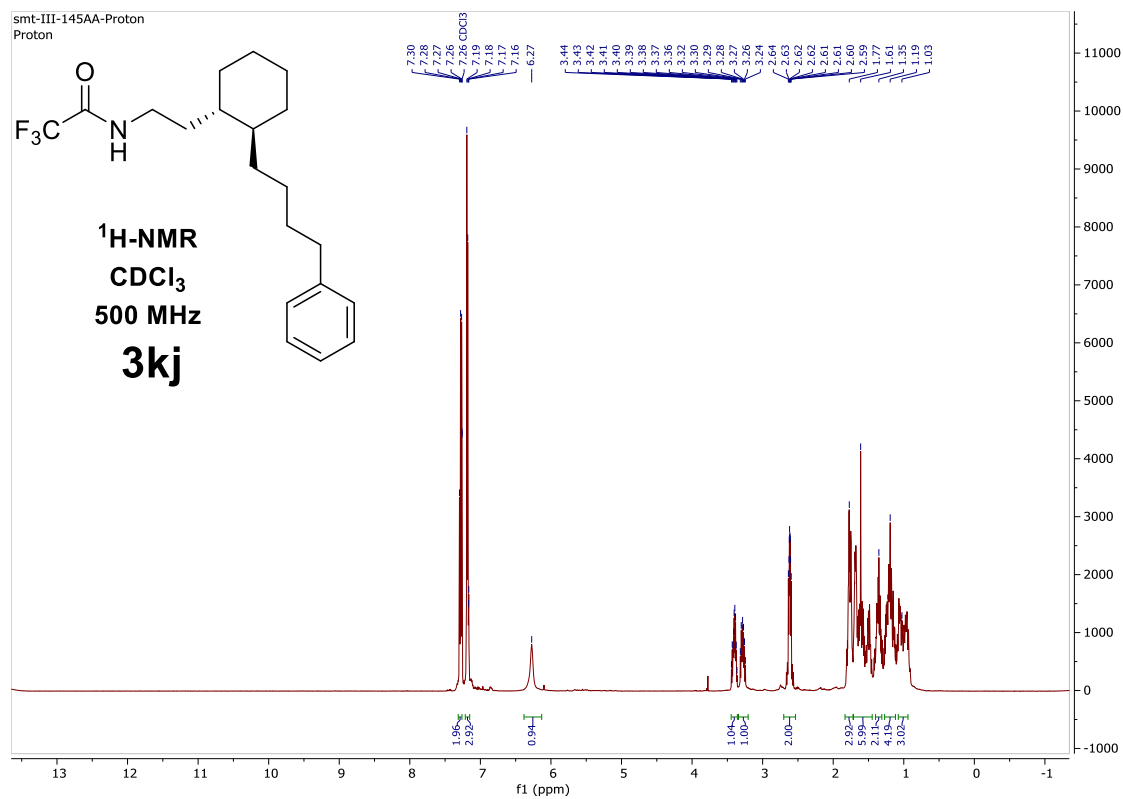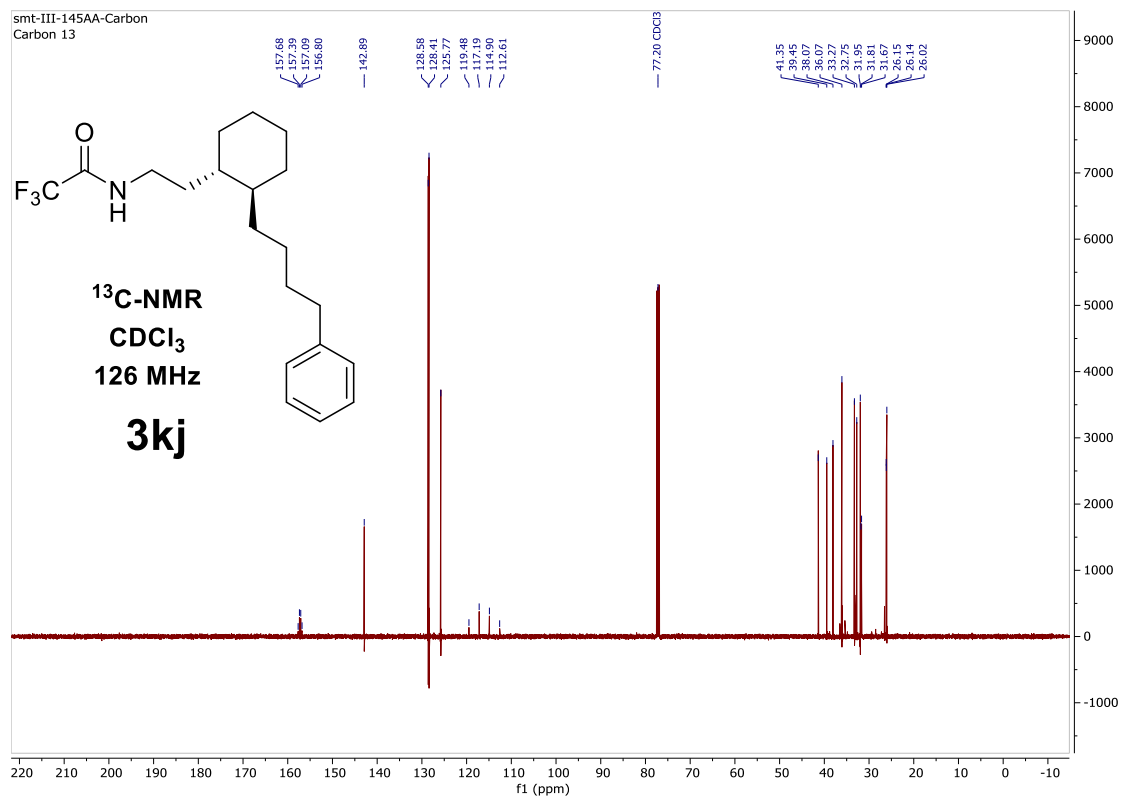

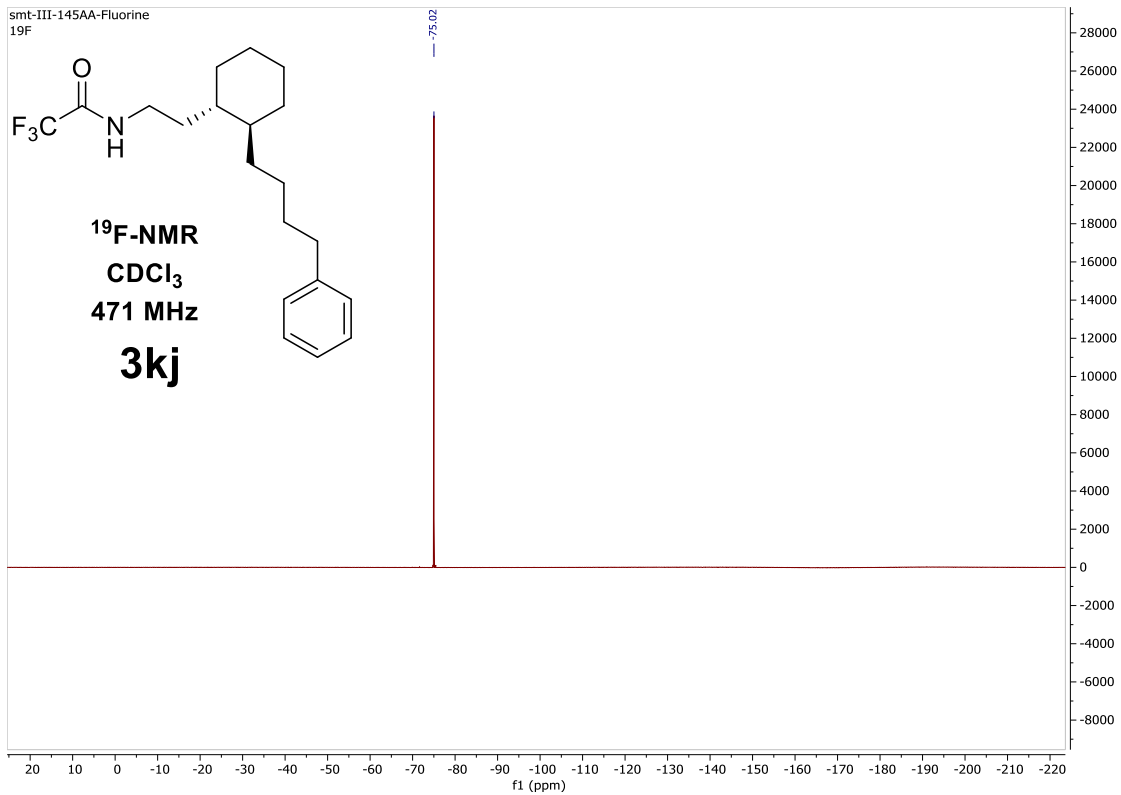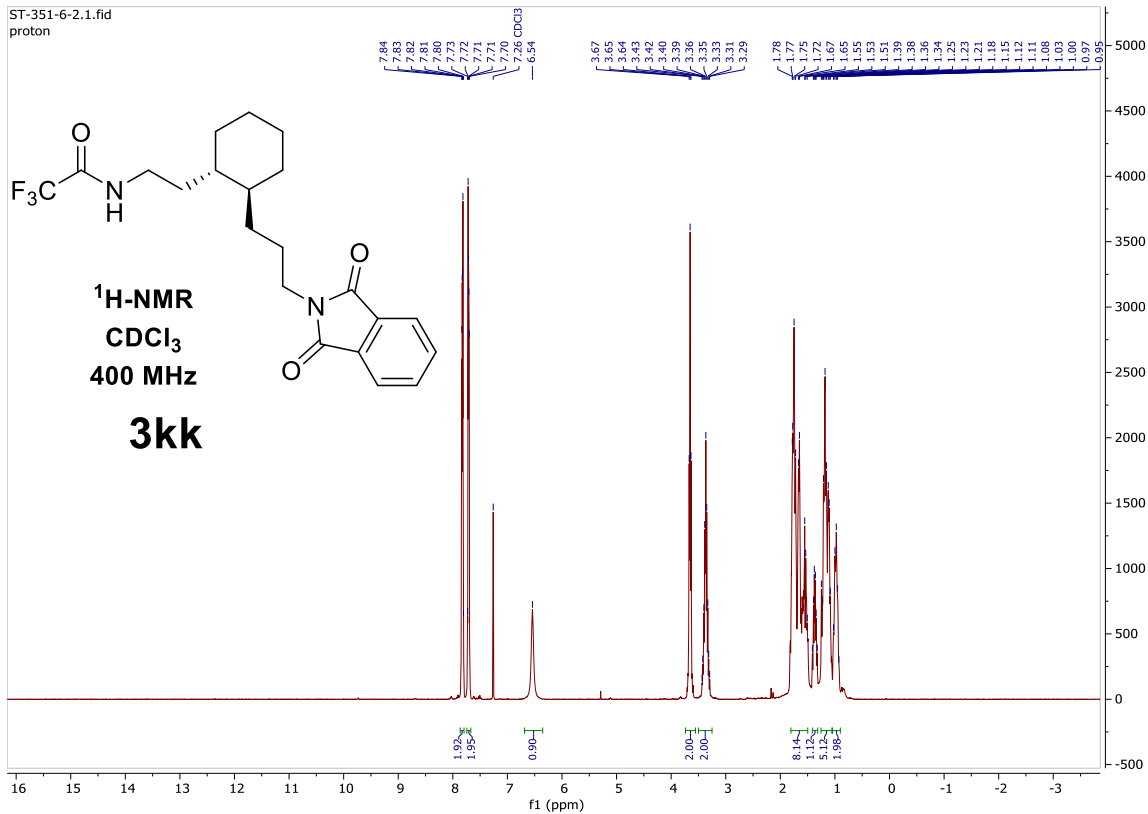

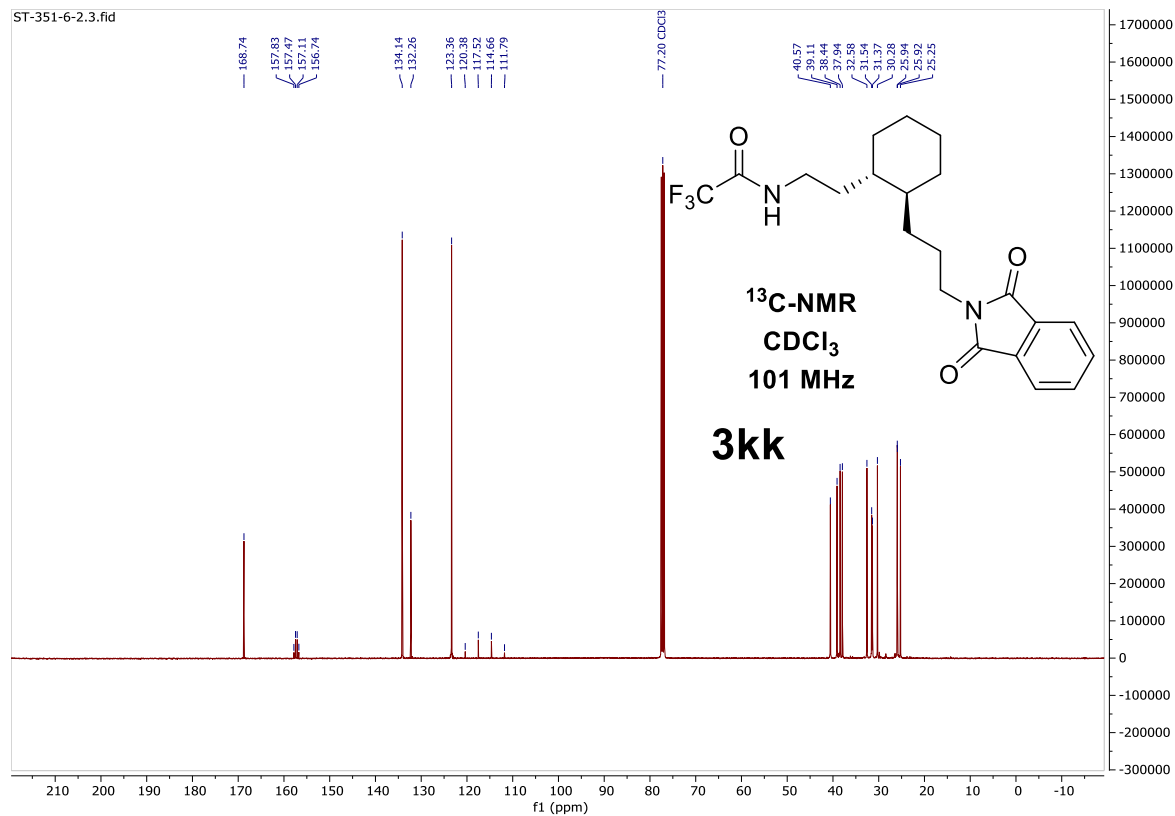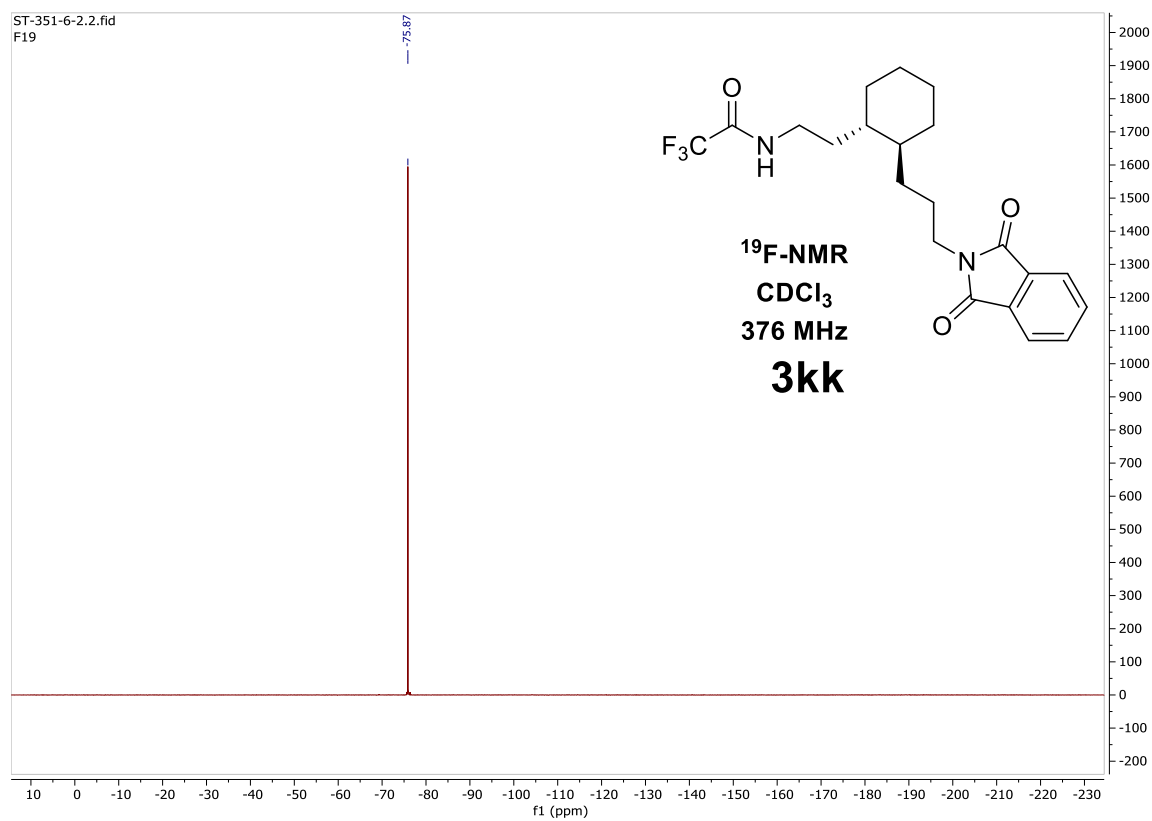





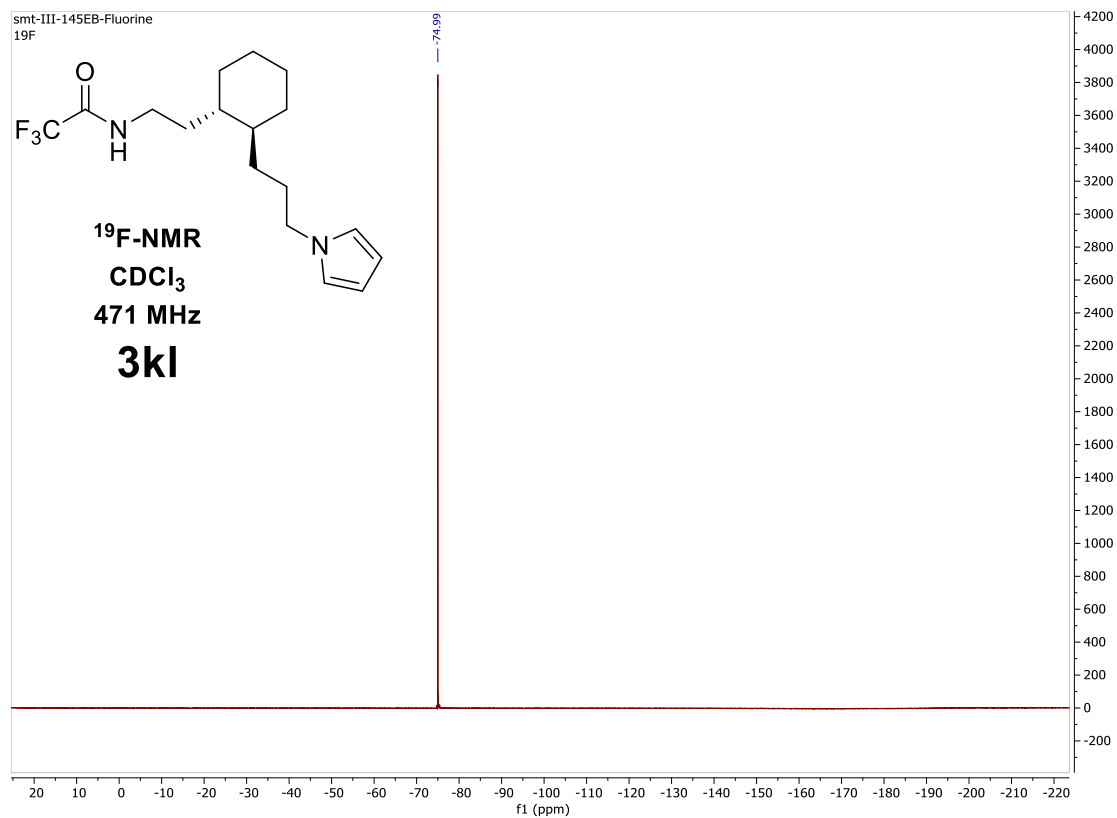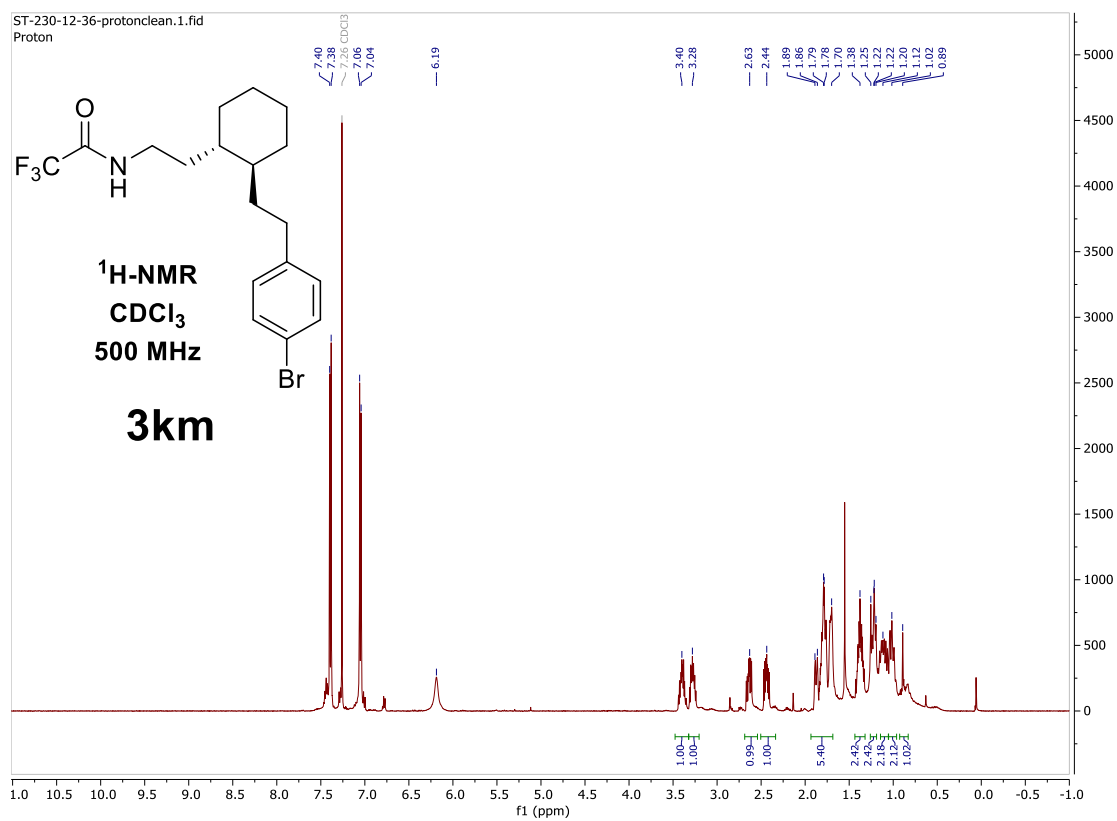

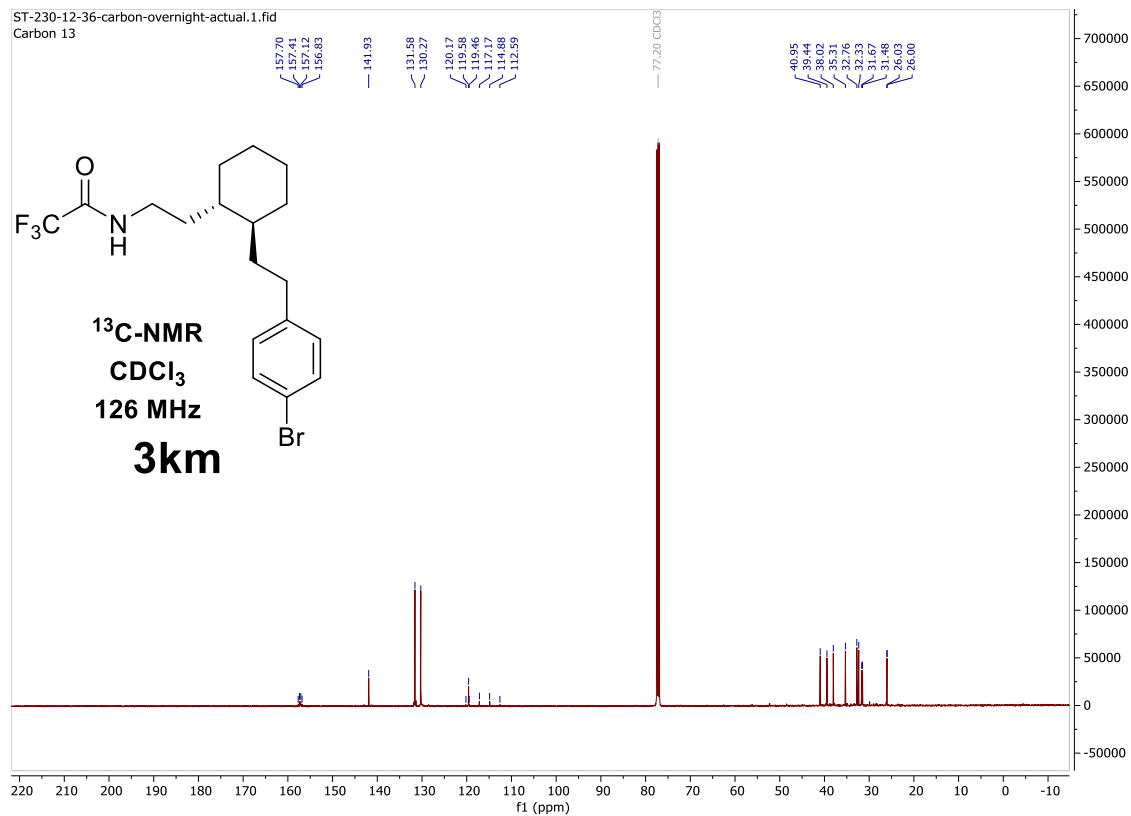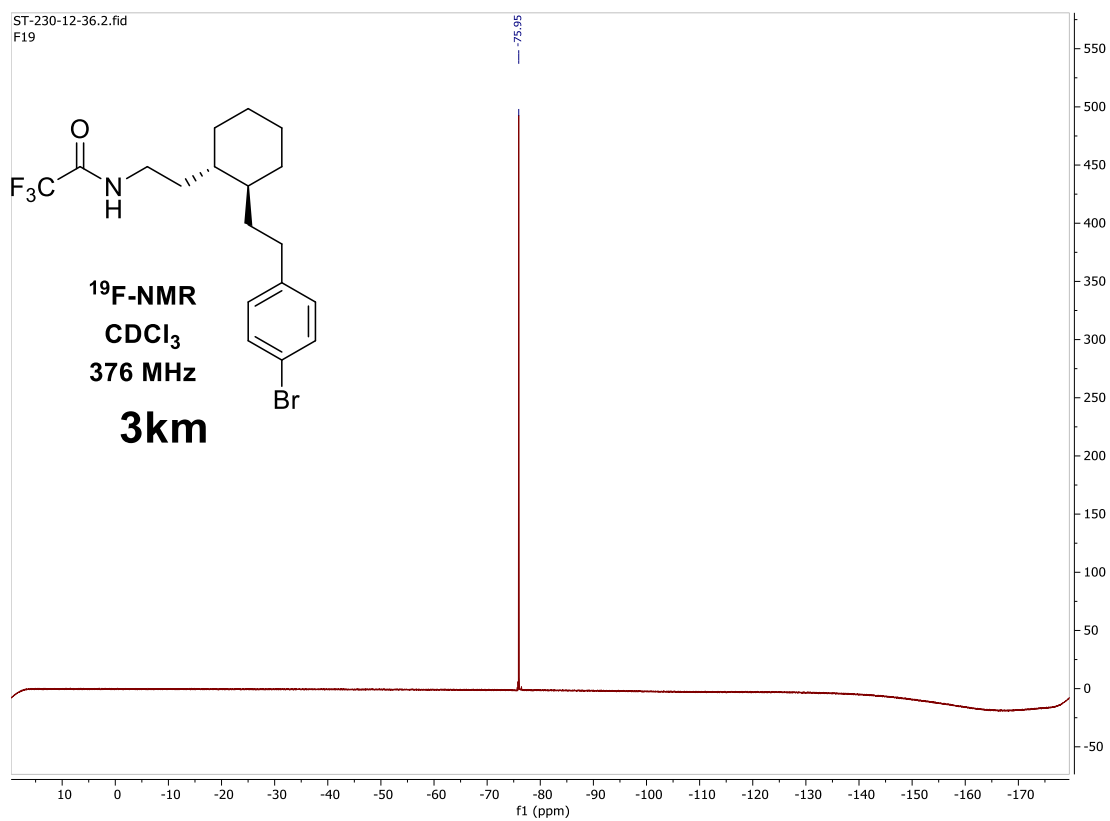

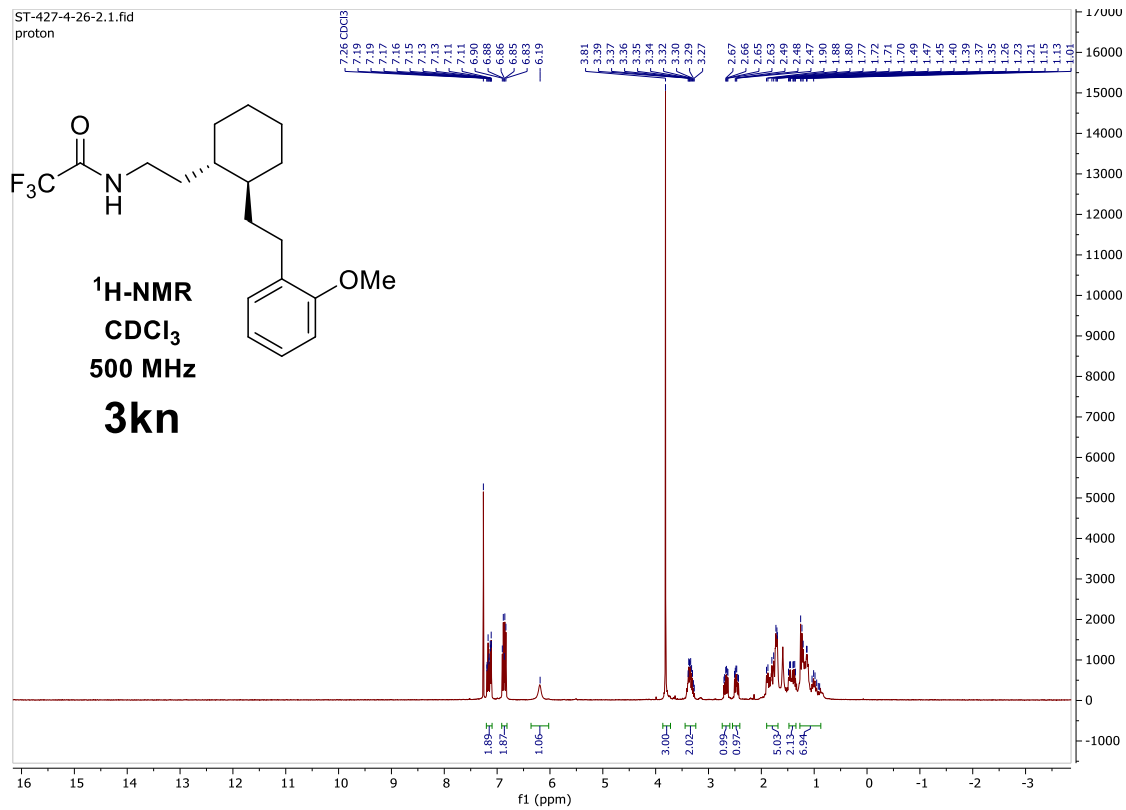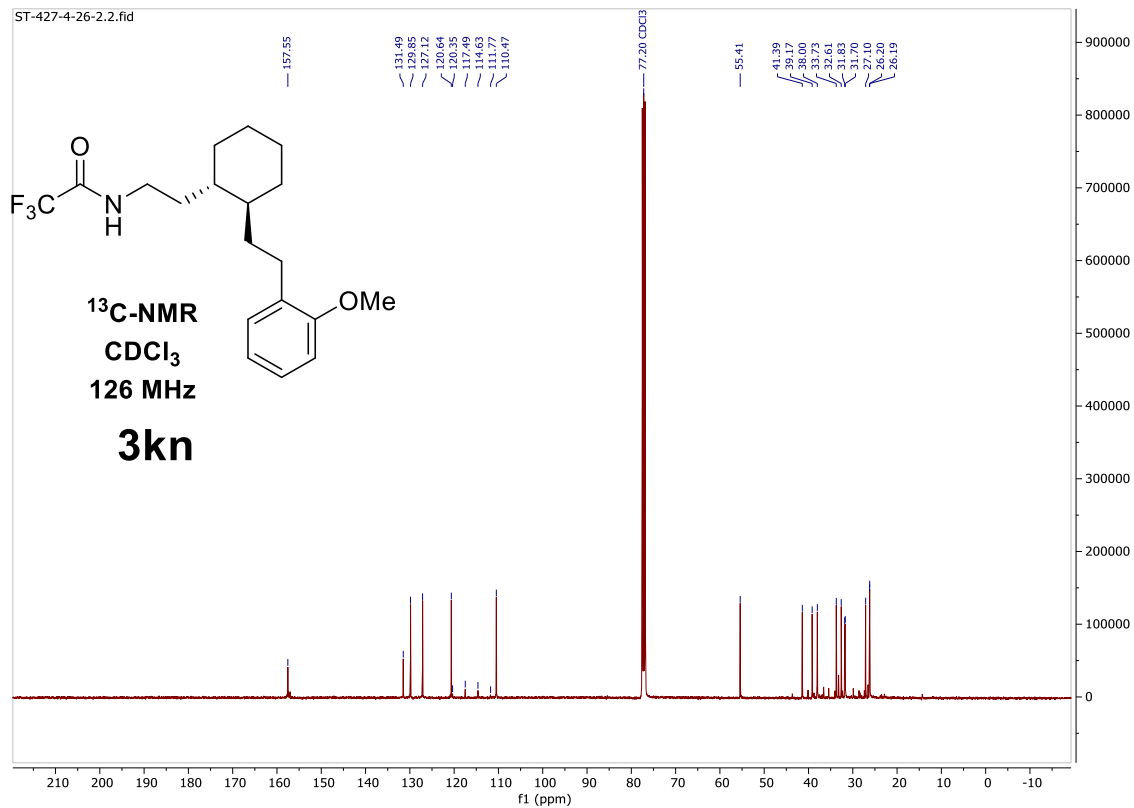

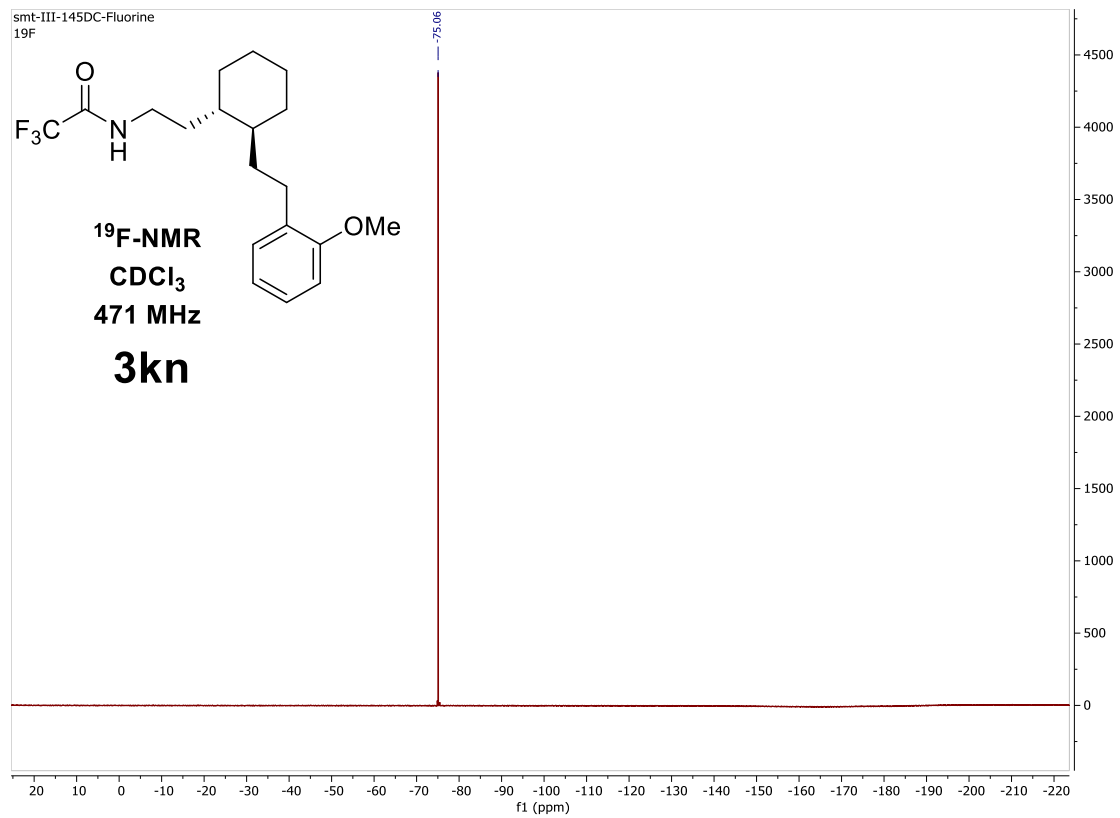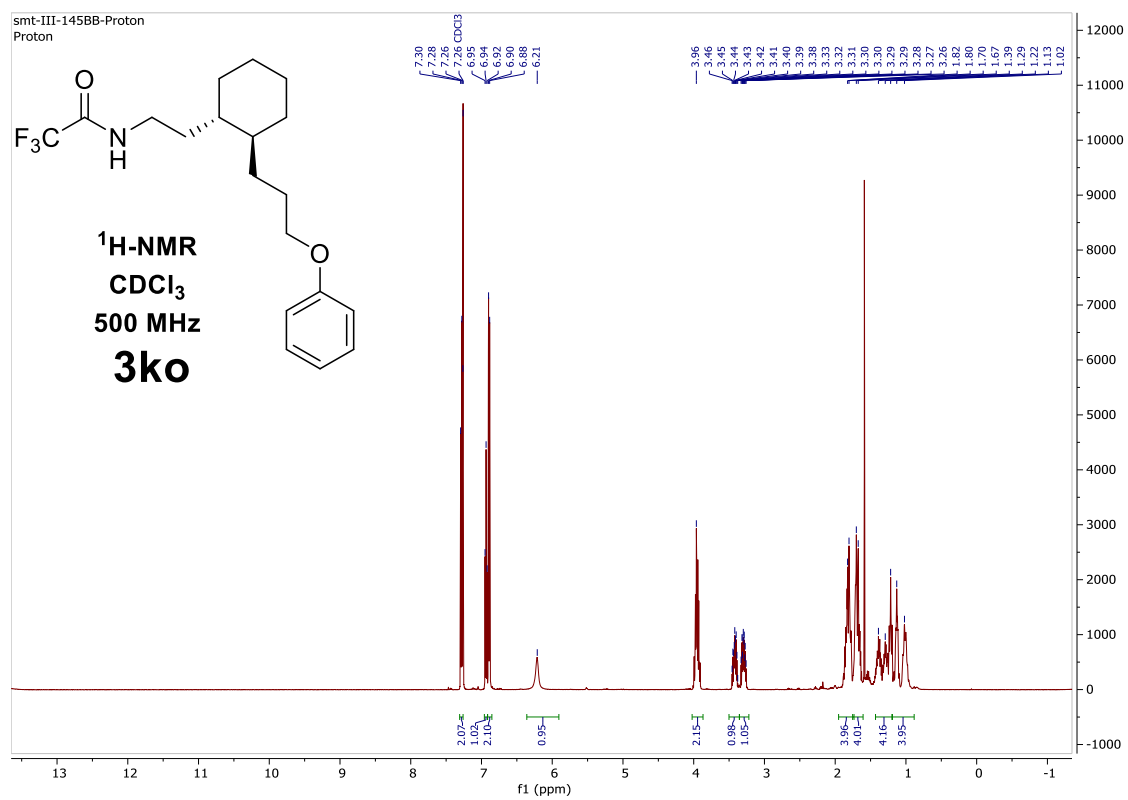

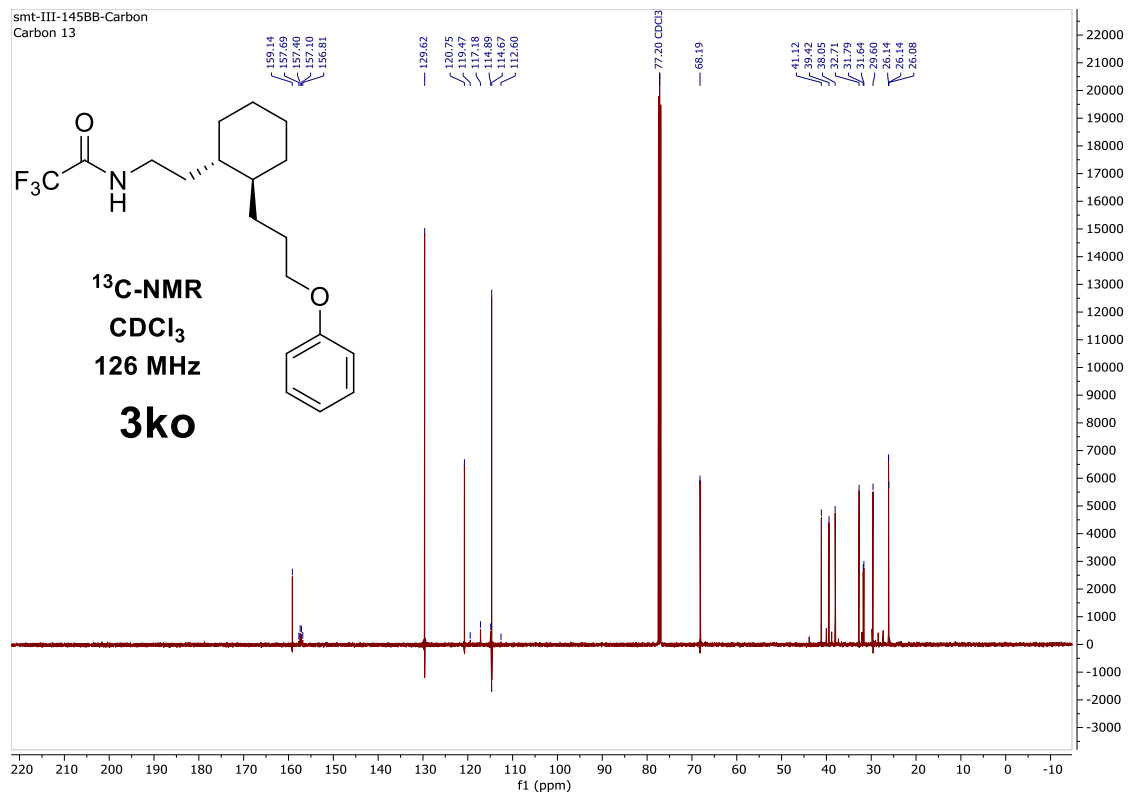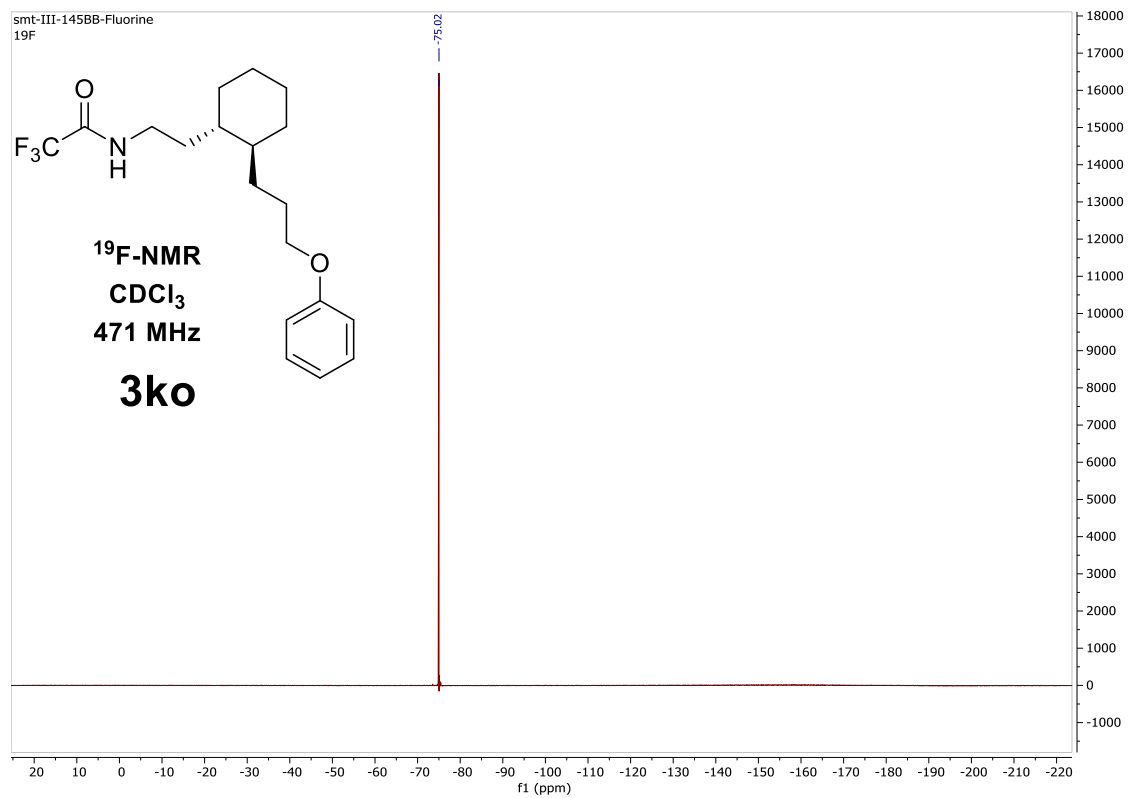



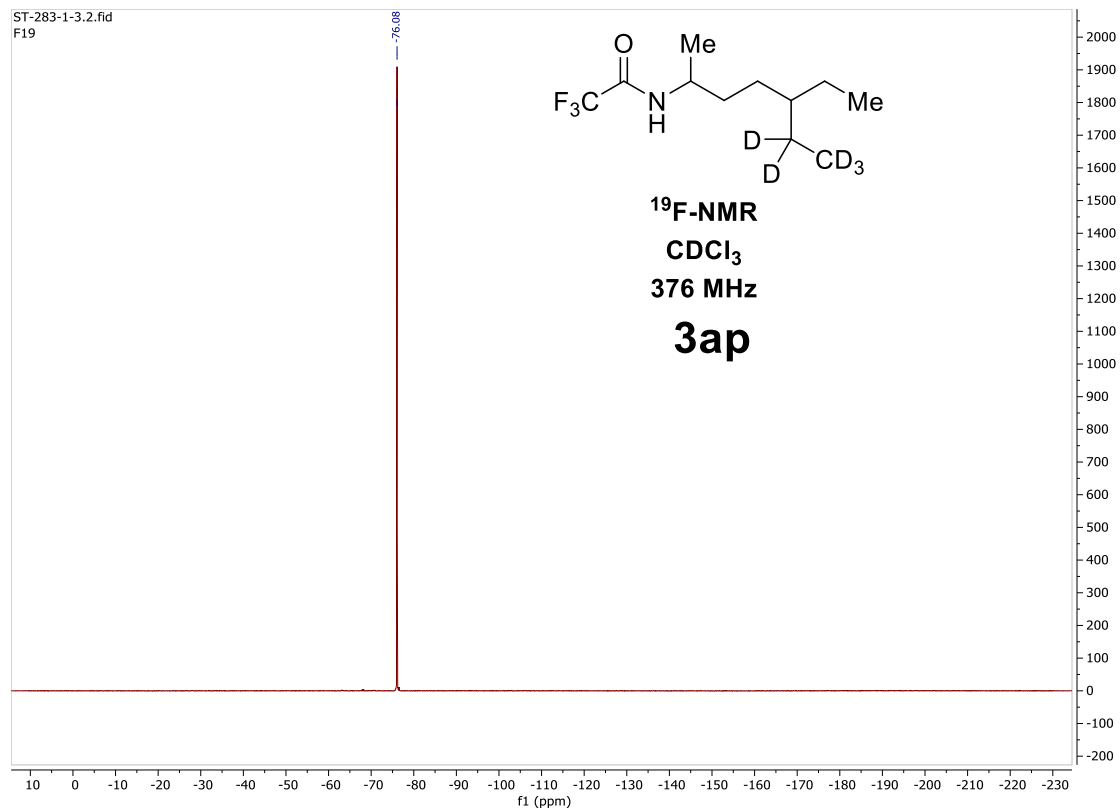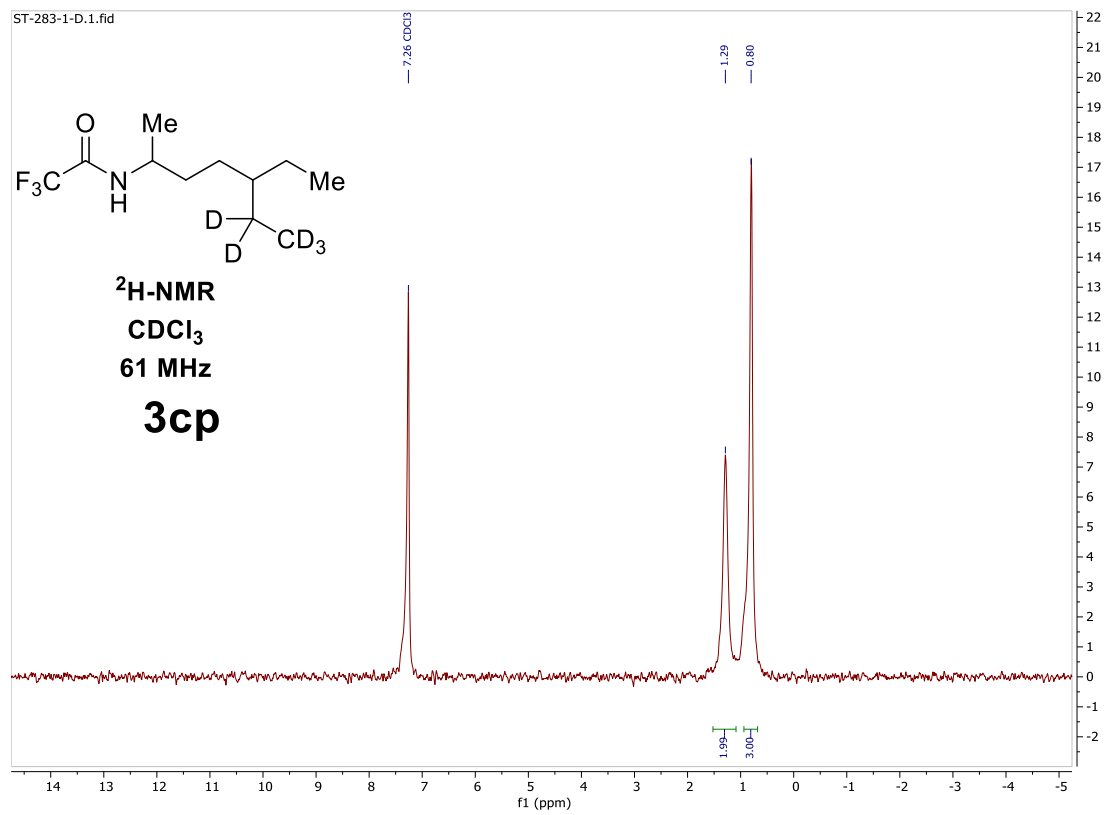



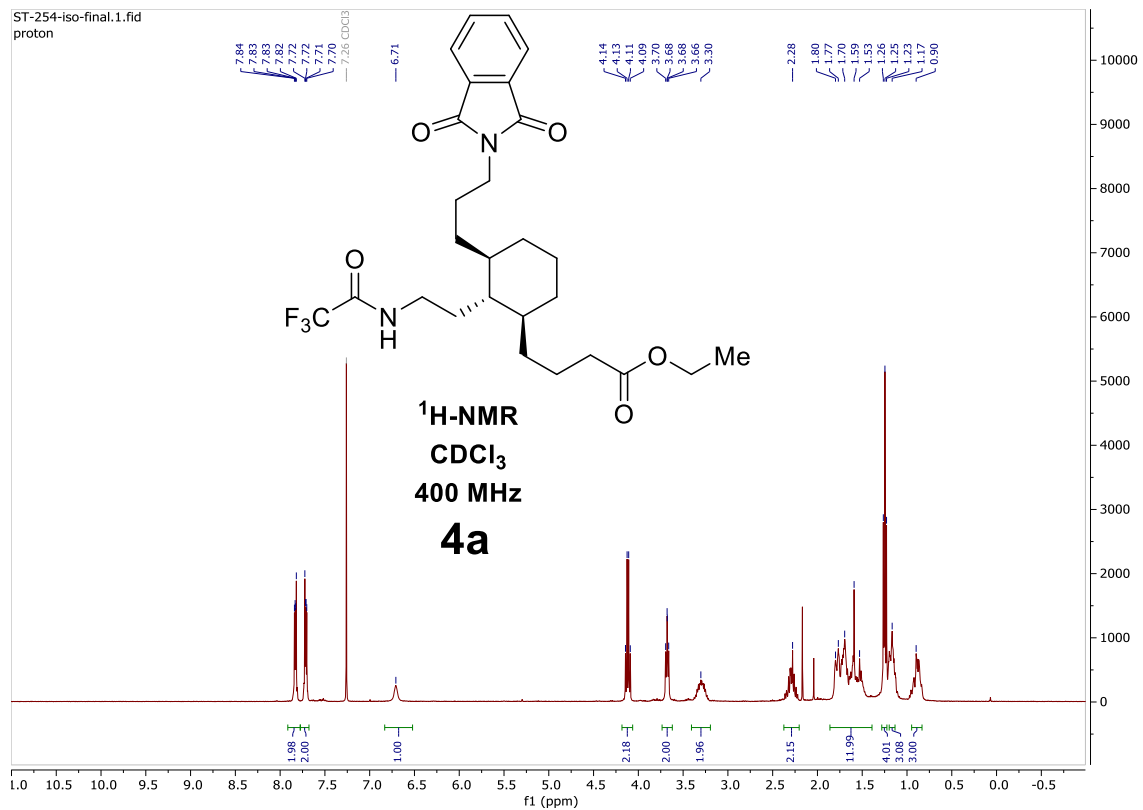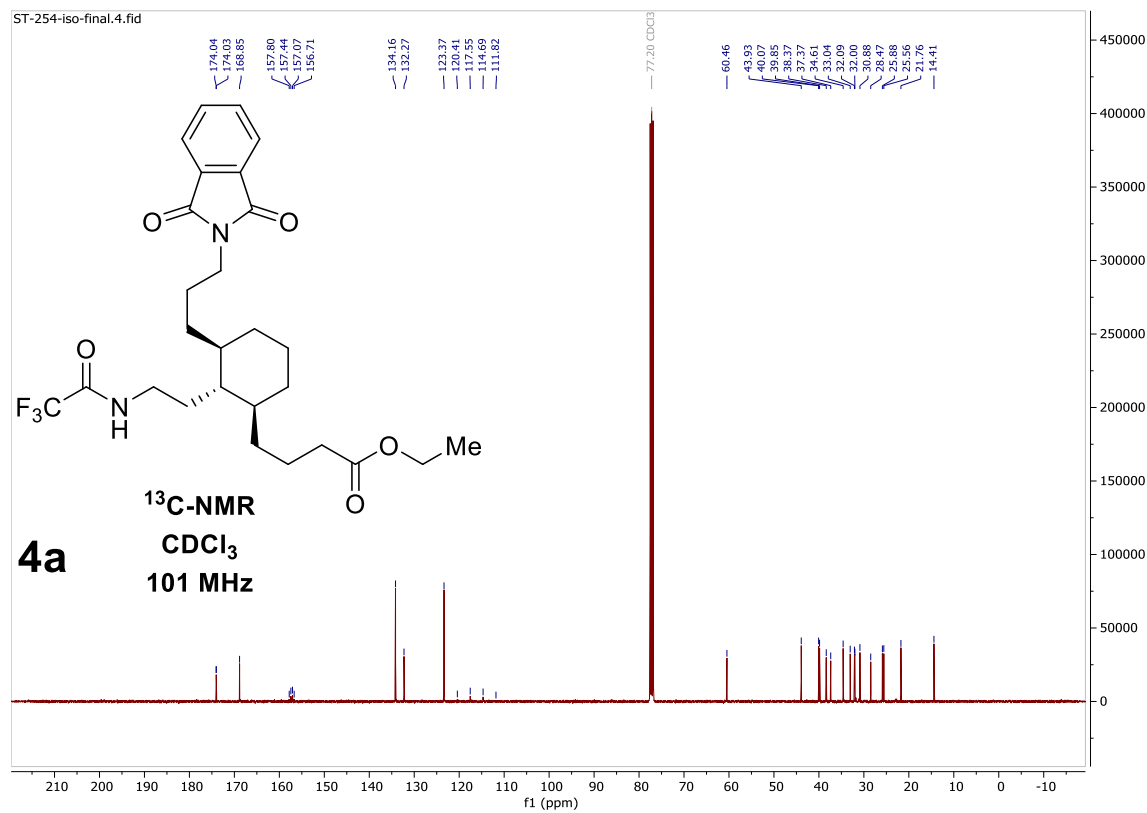

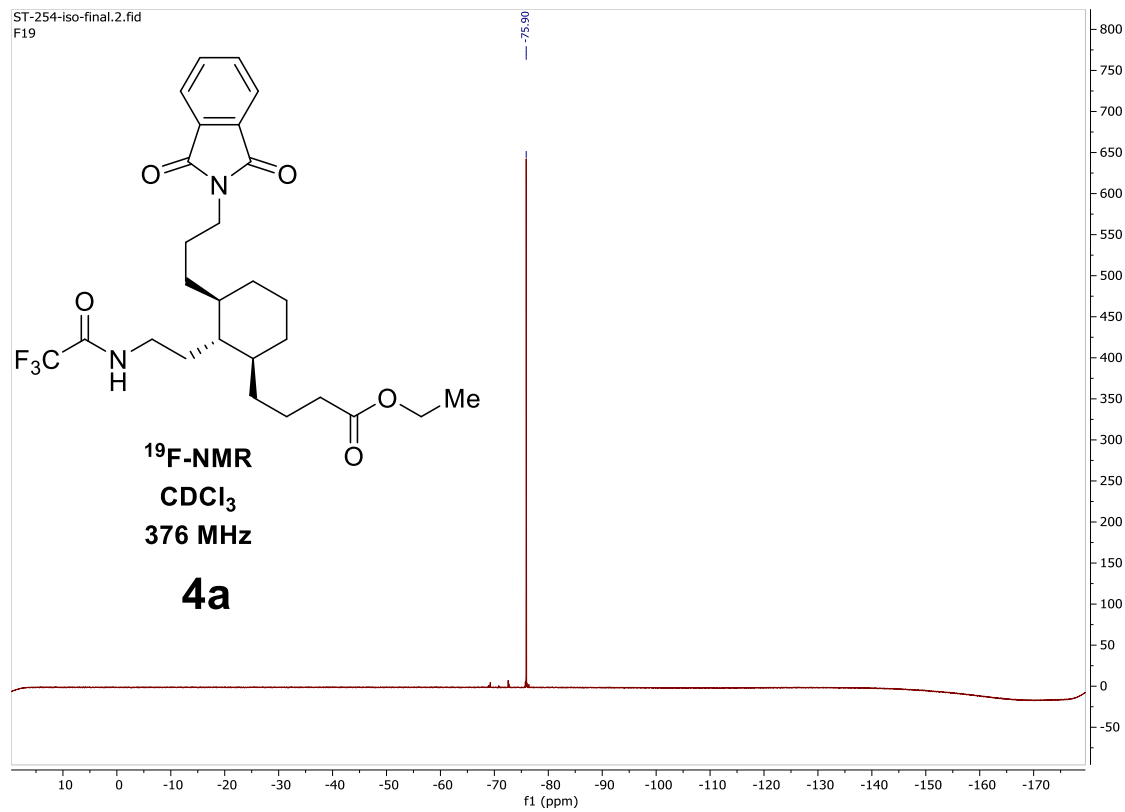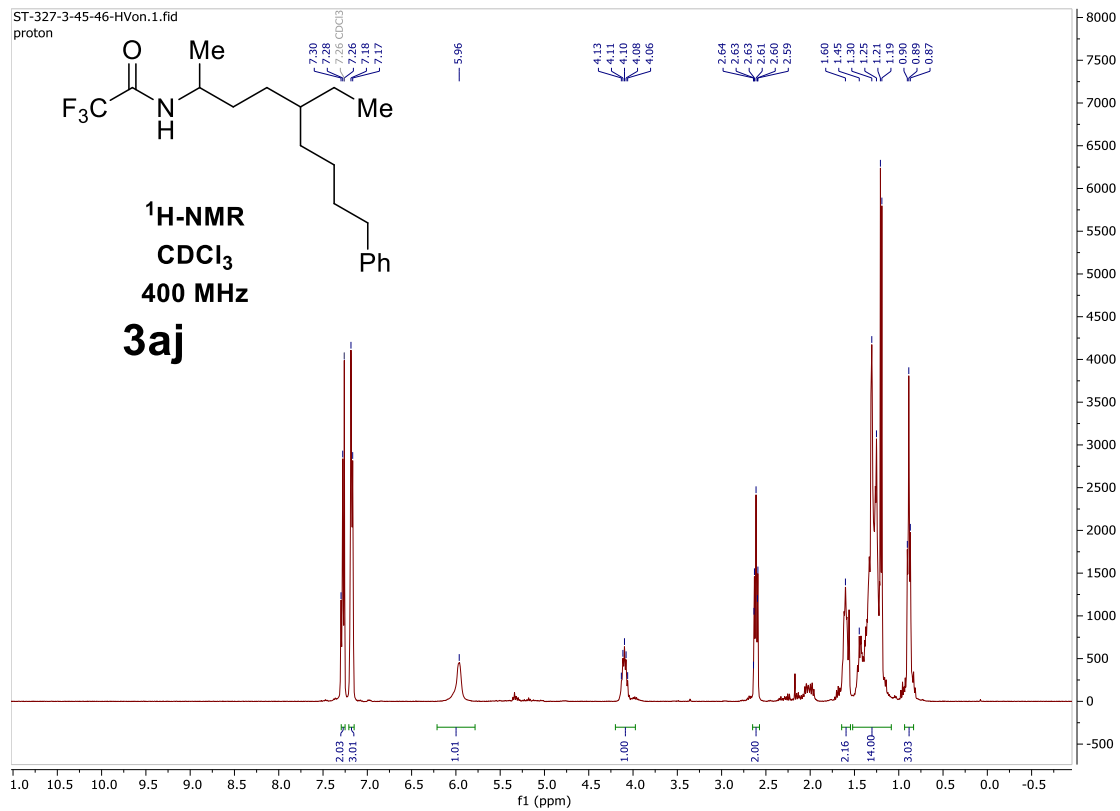

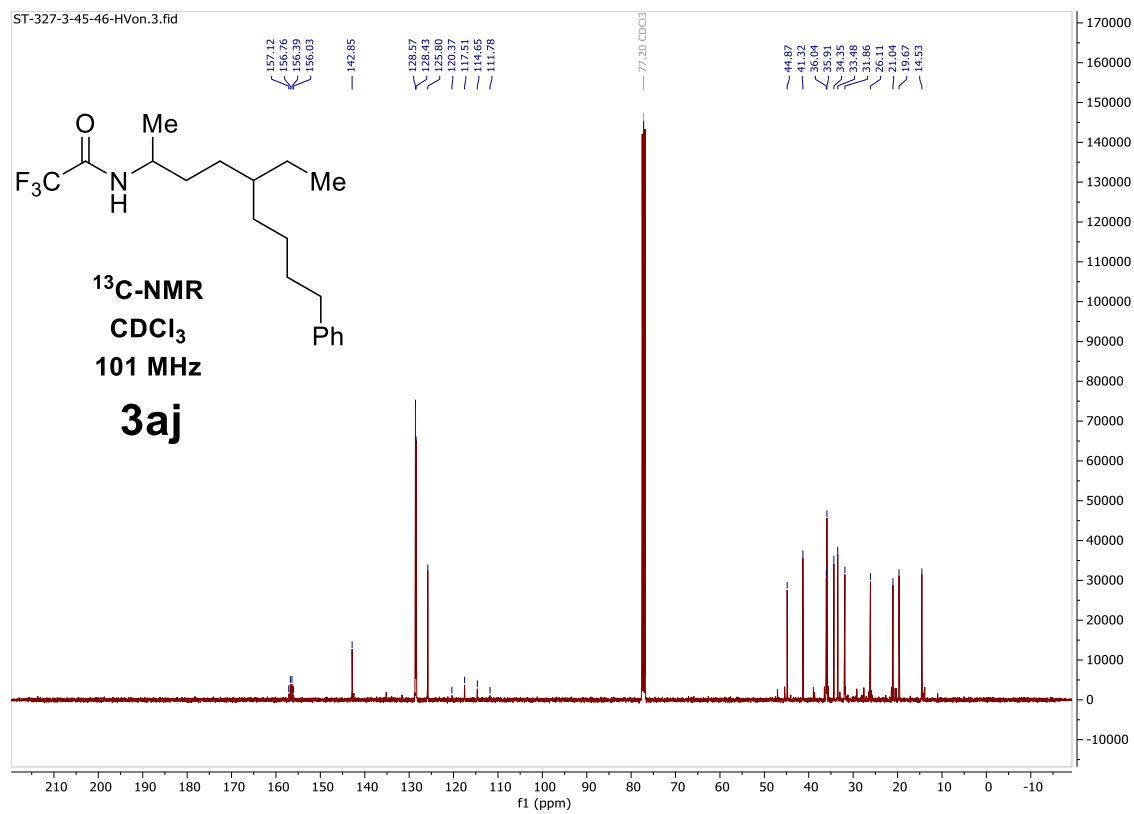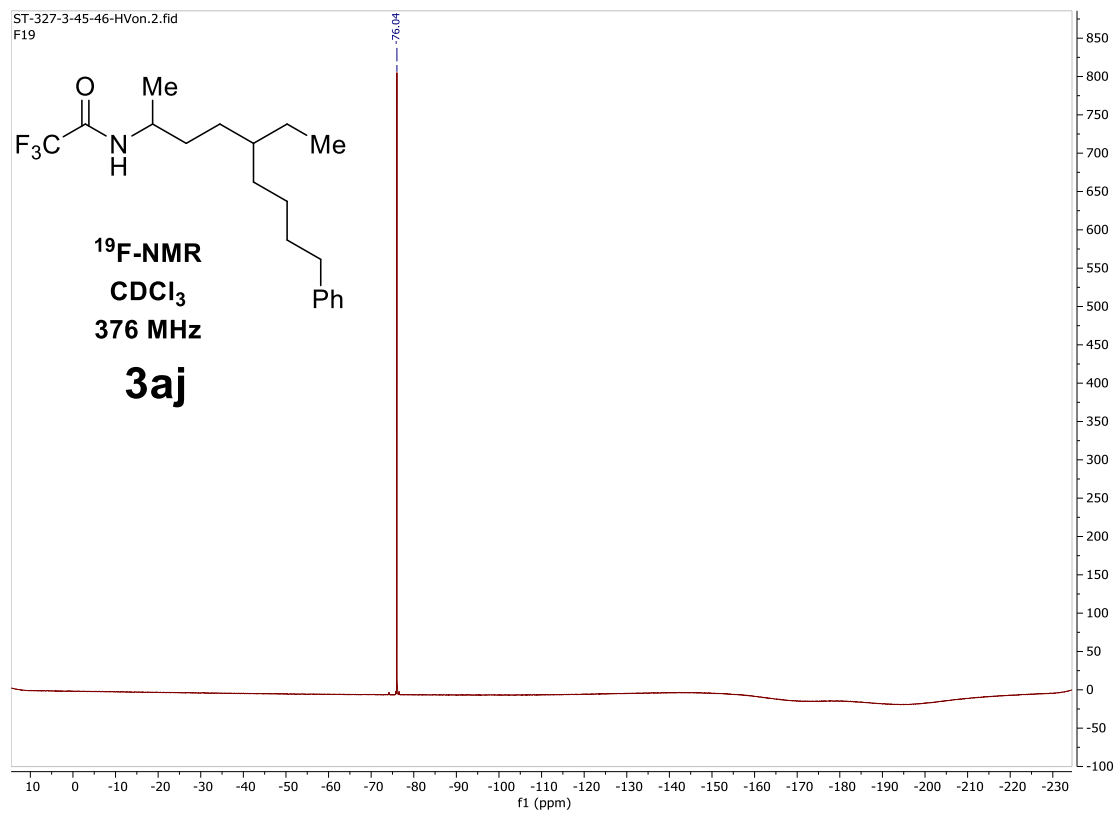

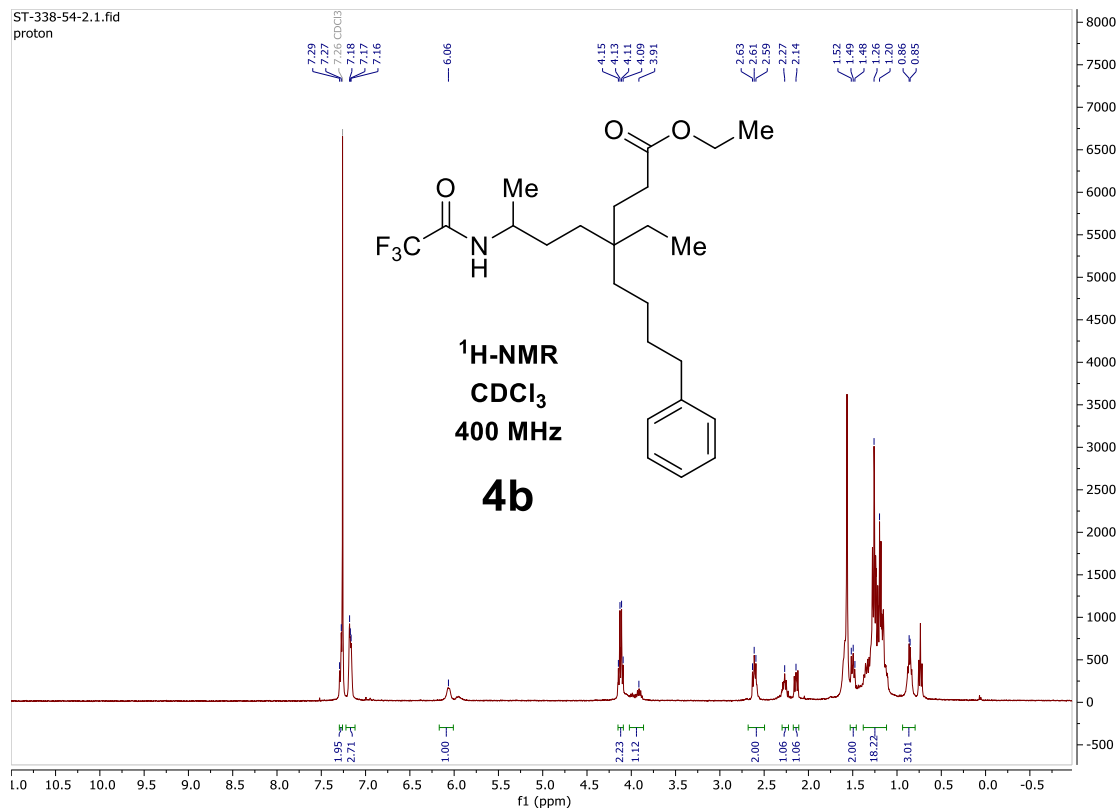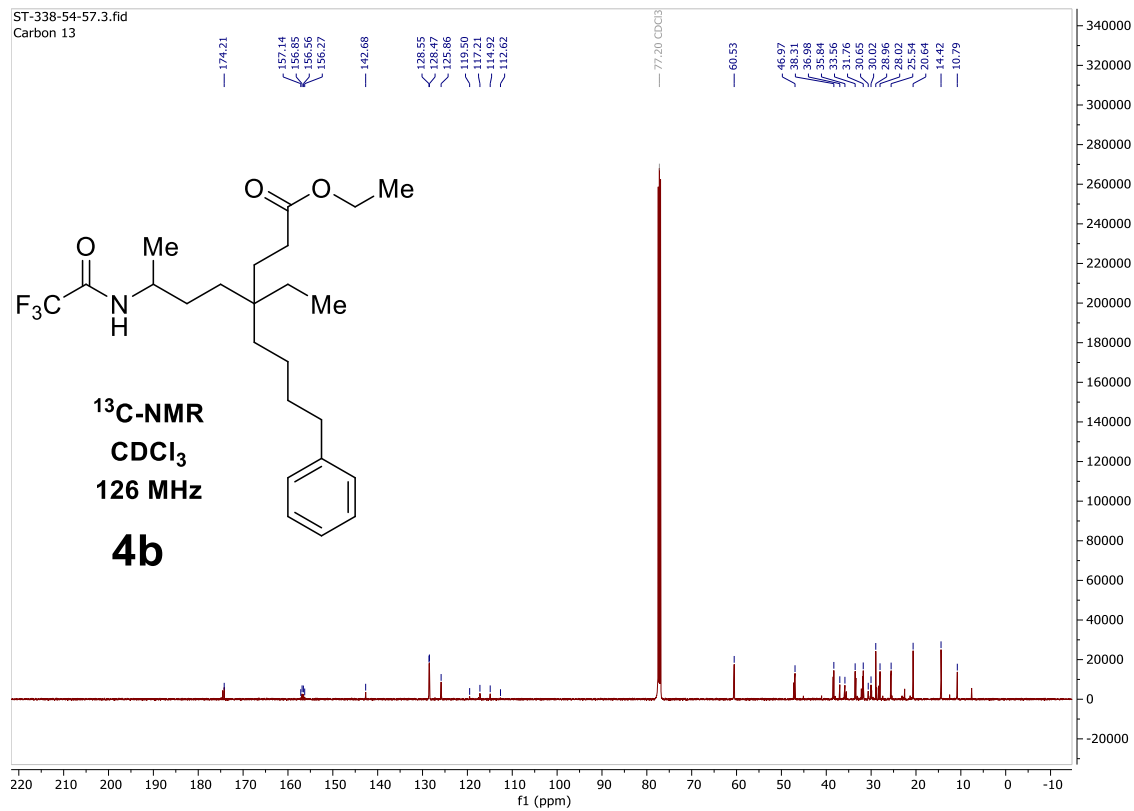

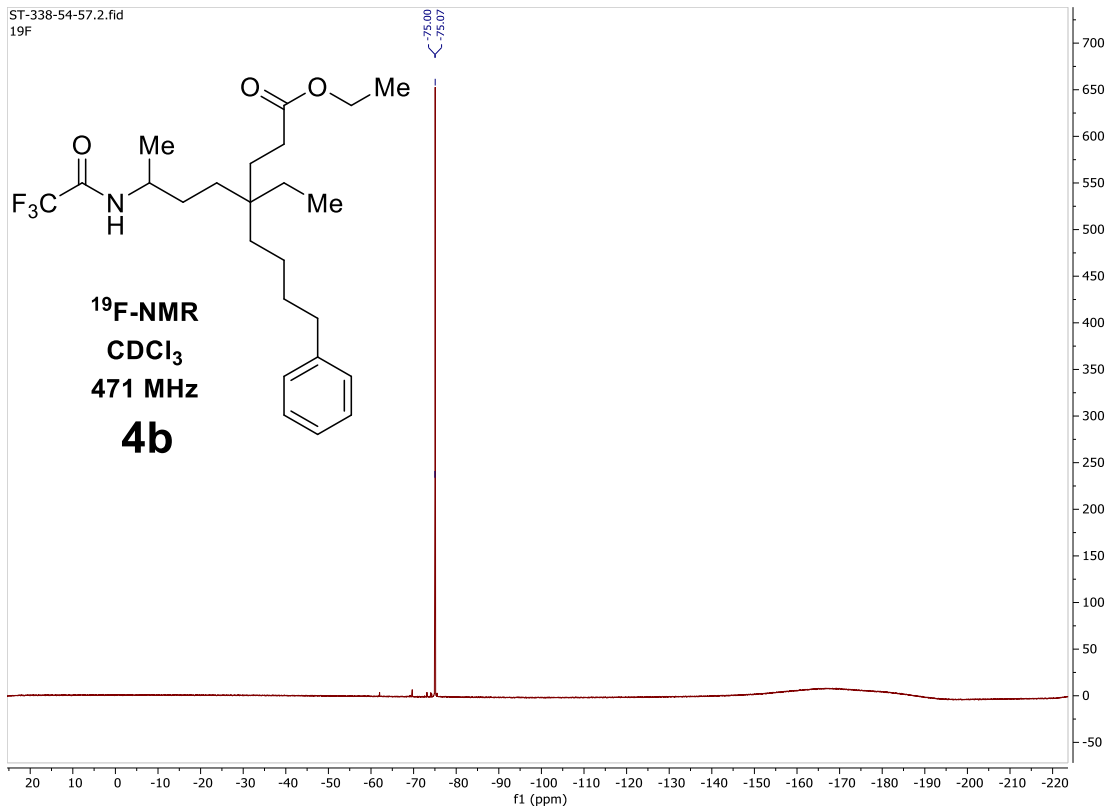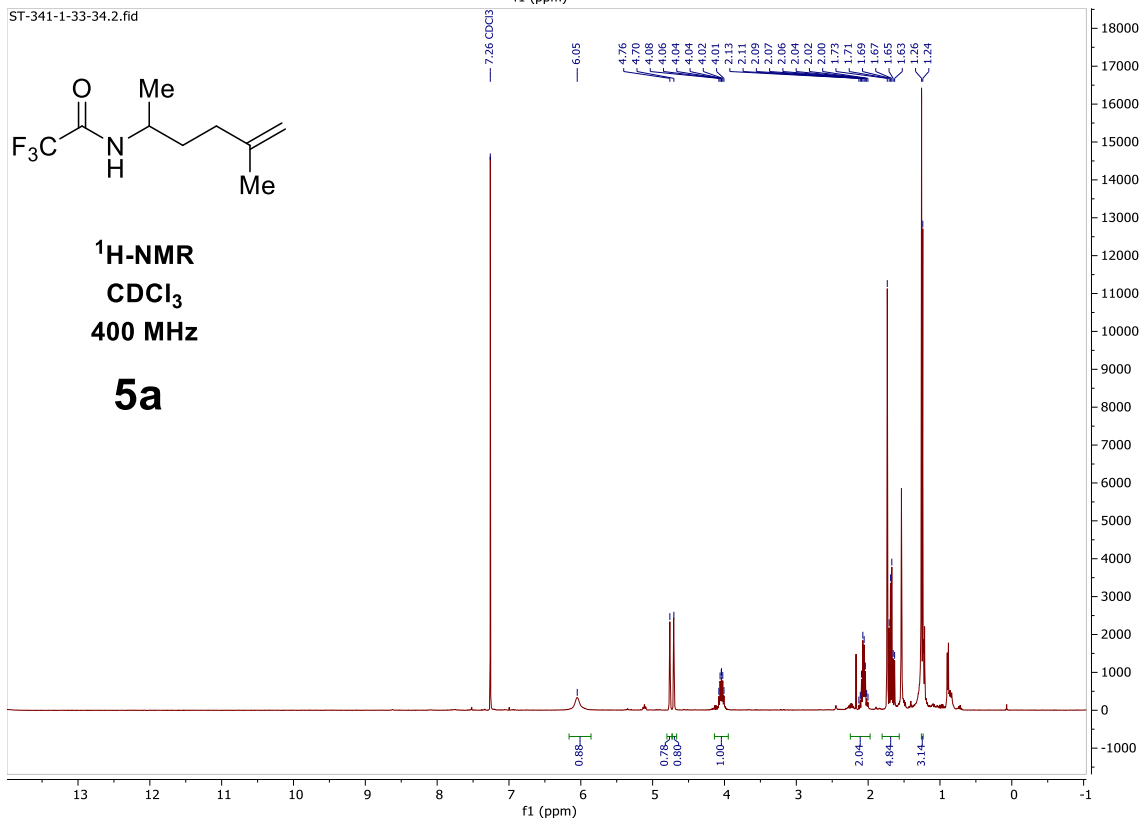

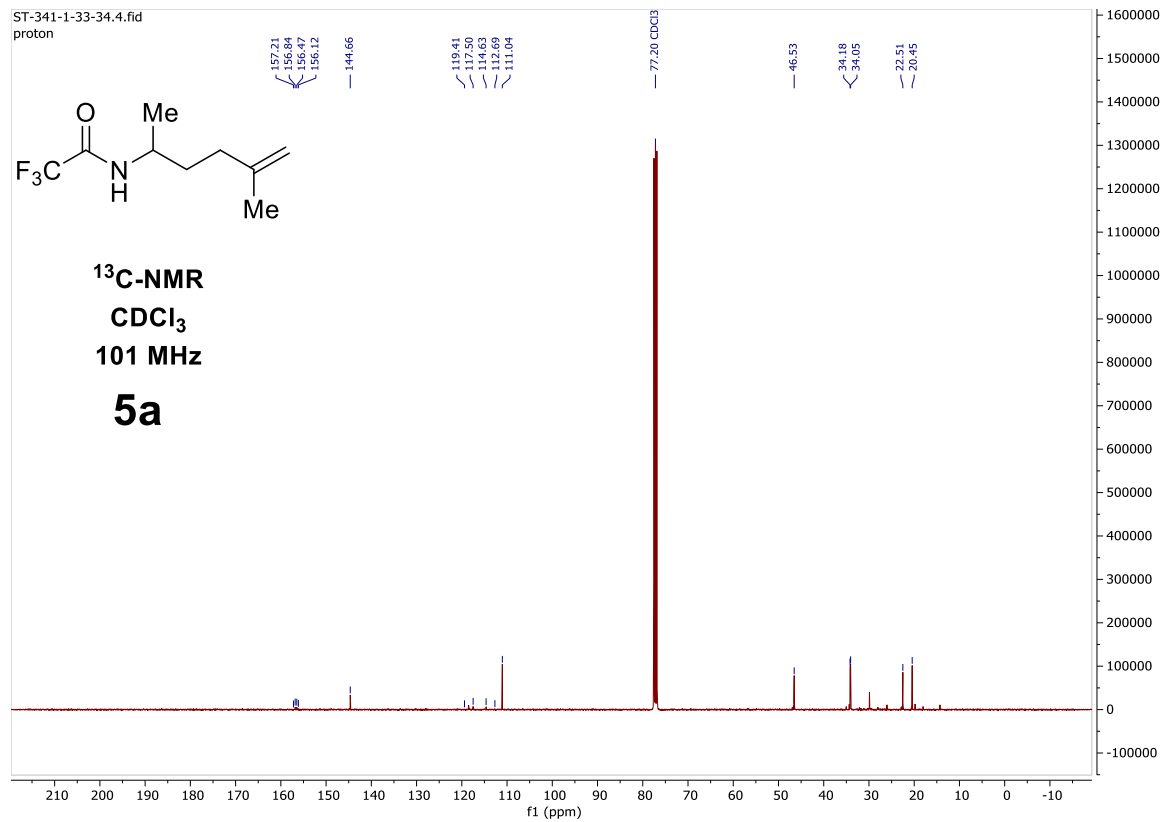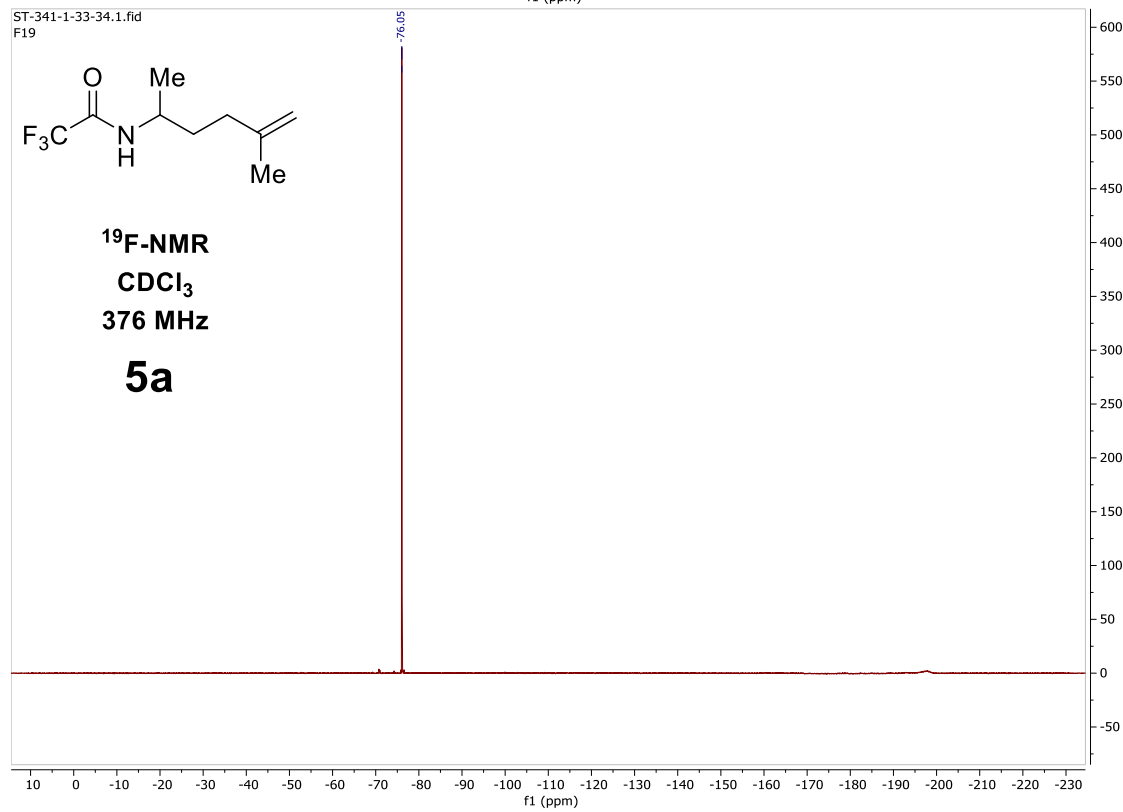

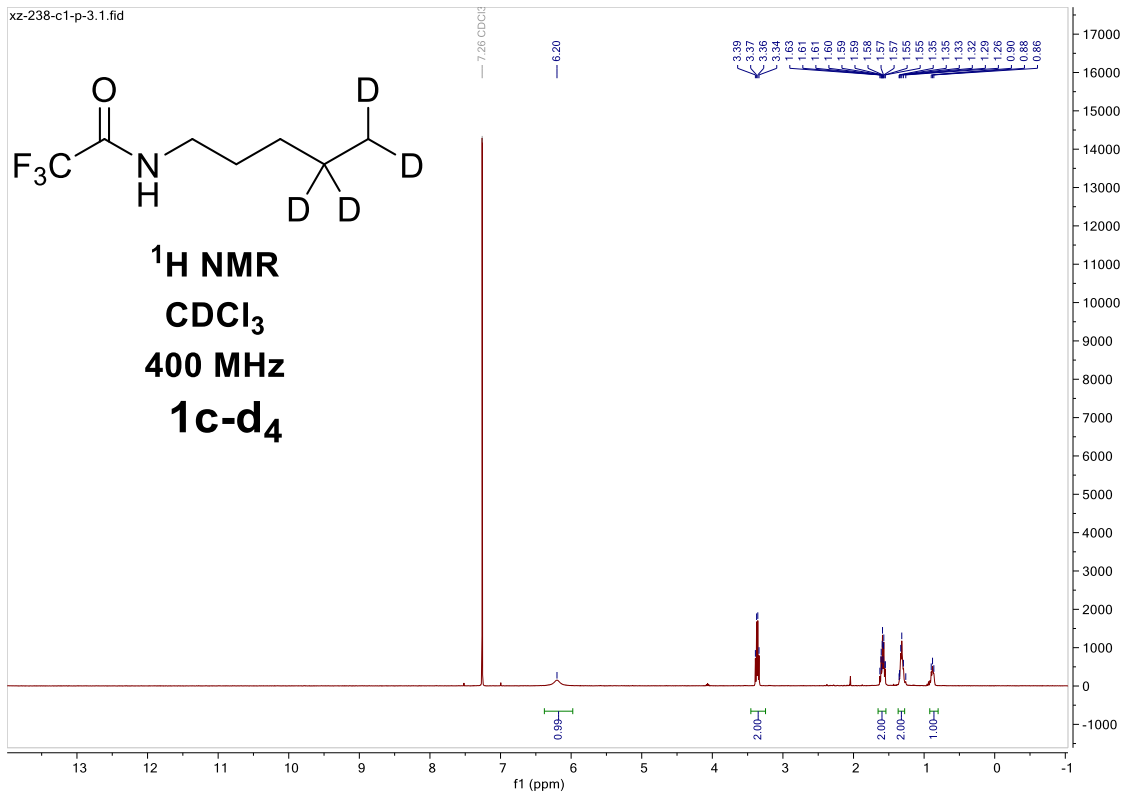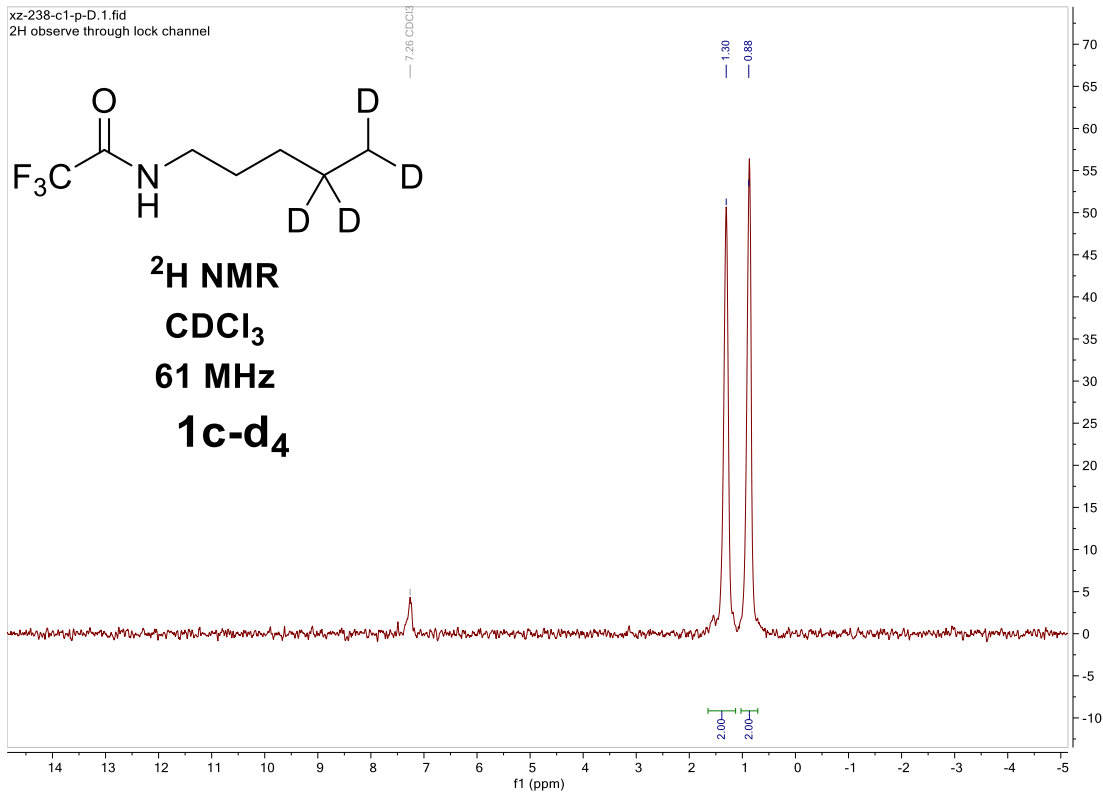

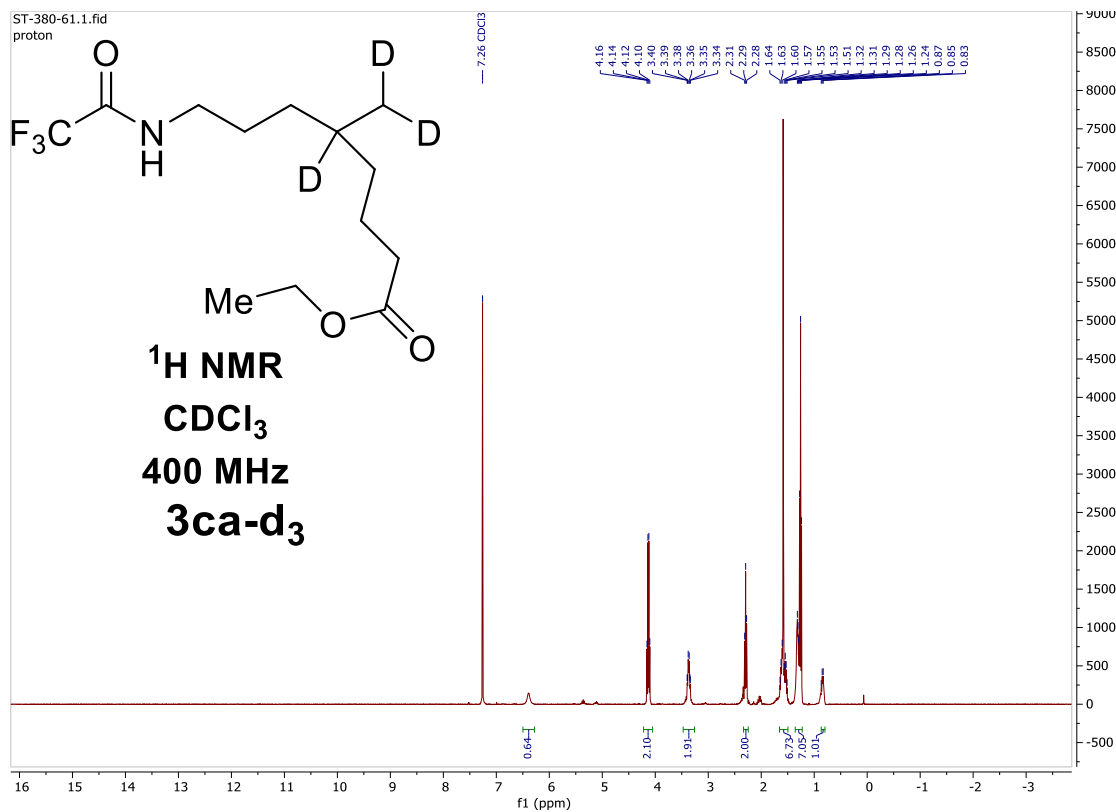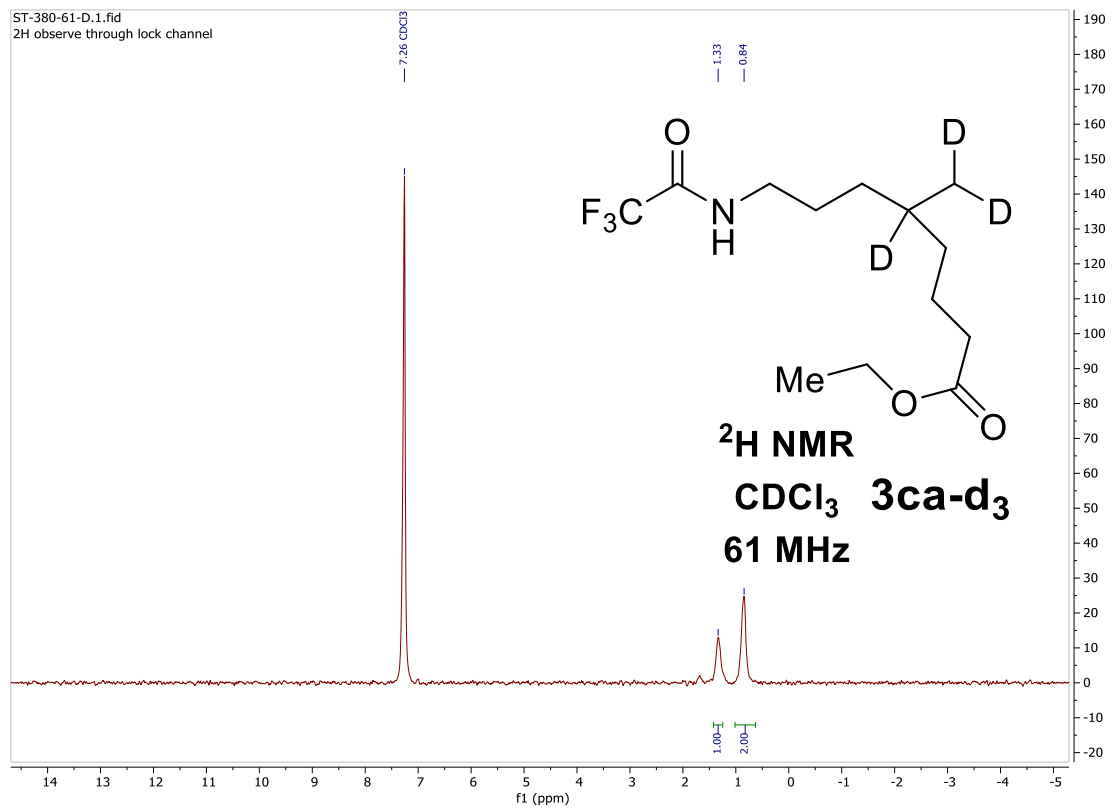

Supplement: NIHMS1556512-supplement-SI.pdf [file NIHMS1556512-supplement-SI.pdf]
